# Supplementary material for: Management of possible serious bacterial infection in young infants closer to home when referral is not feasible: Lessons from implementation research in Himachal Pradesh, India
Source: PubMed Central journal article supplement (PMC7755274; doi:10.1371/journal.pone.0243724), 2020-12-22
Supplement: pone.0243724.s001.pdf [file pone.0243724.s001.pdf]

Country ID:

Site ID

Line-list ID:

Implementation Research on Management of Possible Serious Bacterial Infection (PSBI) in Young Infants (0-59 Days)
Where Referral is Not Feasible

1.CHC 2. PHC 3. SC 4. ASHA's Name 5. ANM's Name

Table with 22 columns: 6. No, 7. Name of the pregnant woman, 8. Age (Yrs), 9. Husband's Name, 10. Village/Address, 11. LMP Date, 12. Expected date of birth (EDD), 13. Date of pregnancy registration, 14. ANC Visits (1st, 2nd, 3rd, 4th), 15. Pregnancy outcome, 16. Date of pregnancy outcome, 17. Place of birth/miscarriage, 18. Birth attendant, 19. Status of mother, 20. Status of newborn, 21. Date of outcome documentation, 22. Date of outcome verification.

CODES:

Collected By, Checked by, Entered by (Initial of name only) and Date (dd/mm/yyyy) fields.

Legend table for codes: 15 Pregnancy outcome, 17 Place of birth/miscarriage, 18 Birth attendant, 19 Status of mother, 20 Status of newborn.
