# Supplementary material for: Management of possible serious bacterial infection in young infants closer to home when referral is not feasible: Lessons from implementation research in Himachal Pradesh, India
Source: PubMed Central journal article supplement (PMC7755274; doi:10.1371/journal.pone.0243724), 2020-12-22
Supplement: pone.0243724.s002.pdf [file pone.0243724.s002.pdf]

Country ID:

Site ID:

FORM ID:

POSTNATAL (HBPNC) HOME VISIT RECORD

2

## Implementation Research On Management Of Possible Serious Bacterial Infection (PSBI) In Young Infants (0-59 Days) Where Referral Is Not Feasible

|            |                |                                            |                      |
|------------|----------------|--------------------------------------------|----------------------|
| 1. PHC -   | 2. Sub-centre- | 3. Village-                                | 4. ASHA -            |
| 5. Mother- | 6. Father-     | 7. Religion- Hindu / Muslim / Sikh / Other | 8. Caste- SC / Other |

|                                              |                                                                                                             |                                                          |
|----------------------------------------------|-------------------------------------------------------------------------------------------------------------|----------------------------------------------------------|
| 9. Visit for Pregnancy preparation- / /      | 10. Ph. No of preg. lady - / / / / / / / / /                                                                | 11. Date of admission for delivery - / / /               |
| 12. Date of Delivery -                       | 13. Place of delivery – Dist. Hospital. / CHC / PHC / Sub-centre / Pvt. / home / road / other / NC          | 14. Type of delivery- Normal / Caesarean / assisted / NC |
| 15. Time of Delivery / AM/PM                 | 16. Outcome - live birth / Still birth / died after birth / NC / NAS                                        | 17. Birth weight (in grms)-                              |
| 18. Sex of Child - Male / Female/ Other / NC | 19. When infant breastfed for first time- First hour / first day / after 1 <sup>st</sup> day / did not / NC | 20. Hospital discharge date (Mother)- / /                |
| 21. Hospital discharge date (Child) - / /    | 22. Child's MCTS No; / / / / / / / / / / / / /                                                              | 23. Mother's MCTS No- / / / / / / / / / / / / /          |
| 24. Infants Name(Ask):                       |                                                                                                             |                                                          |

## (Q 25 to Q 27: TO be filled if any supervision visits were made for this infant)

|                                  |                                |                              |
|----------------------------------|--------------------------------|------------------------------|
| 25. Supervisory visit – Yes / No | 26. Designation of Supervisor– | 27. Date of supervision- / / |
|----------------------------------|--------------------------------|------------------------------|

## Description of assessment by ASHAs during HBPNC visit

(Code Abbreviation= NC = Not captured; R= Right ; W = Wrong)

| Visit number                                                     | 28. Visit 1   | 29. Visit 2   | 30. Visit 3   | 31. Visit 4   | 32. Visit 5   | 33. Visit 6   | 34. Visit 7   | 35. Visit 8          | 36. Sup. Visit (fill up, if visit is made) |
|------------------------------------------------------------------|---------------|---------------|---------------|---------------|---------------|---------------|---------------|----------------------|--------------------------------------------|
| Day after delivery                                               | 1day          | 3rd day       | 7th day       | 14th Day      | 21st day      | 28th day      | 42nd day      | 59 <sup>th</sup> Day |                                            |
| I. Date of visit                                                 | / /           | / /           | / /           | / /           | / /           | / /           | / /           | / /                  |                                            |
| II. Baby alive ( If response yes , skip to V)                    | Yes / No / NC | Yes / No / NC | Yes / No / NC | Yes / No / NC | Yes / No / NC | Yes / No / NC | Yes / No / NC | Yes / No / NC        | R / W / NC                                 |
| III. If Died, date of death                                      | / /           | / /           | / /           | / /           | / /           | / /           | / /           | / /                  | R / W / NC                                 |
| IV. Place of Death ( Institutional / Private/ other - elaborate) |               |               |               |               |               |               |               |                      | R / W / NC                                 |
| V. Infant was clothed according to weather?                      | Yes / No / NC | Yes / No / NC | Yes / No / NC | Yes / No / NC | Yes / No / NC | Yes / No / NC | Yes / No / NC | Yes / No / NC        | R / W / NC                                 |
| VI. Bathed?                                                      | Yes / No / NC |               |               |               |               |               |               |                      | R / W / NC                                 |
| VII. Supplementary feeding?                                      | Yes / No / NC | Yes / No / NC | Yes / No / NC | Yes / No / NC | Yes / No / NC | Yes / No / NC | Yes / No / NC | Yes / No / NC        | R / W / NC                                 |

Country ID:

Site ID:

FORM ID:

POSTNATAL (HBPNC) HOME VISIT RECORD

2

## Implementation Research On Management Of Possible Serious Bacterial Infection (PSBI) In Young Infants (0-59 Days) Where Referral Is Not Feasible

| Visit number                                                                                                                                                     | 28.Visit 1    | 29.Visit 2    | 30.Visit 3    | 31.Visit 4    | 32.Visit 5    | 33.Visit 6    | 34.Visit 7    | 35.Visit 8    | 36.Sup. Visit |
|------------------------------------------------------------------------------------------------------------------------------------------------------------------|---------------|---------------|---------------|---------------|---------------|---------------|---------------|---------------|---------------|
| VIII. Complete breast feeding ( 5-6 times in day and 3/4 times in night)                                                                                         | Yes / No / NC | Yes / No / NC | Yes / No / NC | Yes / No / NC | Yes / No / NC | Yes / No / NC | Yes / No / NC | Yes / No / NC | R / W / NC    |
| IX. Weight of the infant, in grams ( write 9999 if not documented)                                                                                               |               |               |               |               |               |               |               |               | R / W / NC    |
| X. Temperature of the infant, in° F (write 999.9 if not documented)                                                                                              |               |               |               |               |               |               |               |               | R / W / NC    |
| XI. Counted respiratory rate/min ( write 99 if not documented)                                                                                                   |               |               |               |               |               |               |               |               | R / W / NC    |
| XII. Was umbilicus draining pus?                                                                                                                                 | Yes / No / NC | Yes / No / NC | Yes / No / NC | Yes / No / NC | Yes / No / NC | Yes / No / NC | Yes / No / NC | Yes / No / NC | R / W / NC    |
| XIII. Was Eyes draining pus?                                                                                                                                     | Yes / No / NC | Yes / No / NC | Yes / No / NC | Yes / No / NC | Yes / No / NC | Yes / No / NC | Yes / No / NC | Yes / No / NC | R / W / NC    |
| XIV. < 10 skin pustules?                                                                                                                                         | Yes / No / NC | Yes / No / NC | Yes / No / NC | Yes / No / NC | Yes / No / NC | Yes / No / NC | Yes / No / NC | Yes / No / NC | R / W / NC    |
| <b>(If following signs were present ASHAs are mandated to inform ANM /MOs OR immediately call 102 ambulance and refer the infant to nearest health facility)</b> |               |               |               |               |               |               |               |               |               |
| XV. Convulsions?                                                                                                                                                 | Yes / No / NC | Yes / No / NC | Yes / No / NC | Yes / No / NC | Yes / No / NC | Yes / No / NC | Yes / No / NC | Yes / No / NC | R / W / NC    |
| XVI. Respiratory rate $\geq$ 60 (Fast breathing)                                                                                                                 | Yes / No / NC | Yes / No / NC | Yes / No / NC | Yes / No / NC | Yes / No / NC | Yes / No / NC | Yes / No / NC | Yes / No / NC | R / W / NC    |
| XVII. Chest indrawing?                                                                                                                                           | Yes / No / NC | Yes / No / NC | Yes / No / NC | Yes / No / NC | Yes / No / NC | Yes / No / NC | Yes / No / NC | Yes / No / NC | R / W / NC    |
| XVIII. Stopped feeding/ unable to feed well?                                                                                                                     | Yes / No / NC | Yes / No / NC | Yes / No / NC | Yes / No / NC | Yes / No / NC | Yes / No / NC | Yes / No / NC | Yes / No / NC | R / W / NC    |
| XIX. Body temp. $\geq$ 99° F OR < 95° F                                                                                                                          | Yes / No / NC | Yes / No / NC | Yes / No / NC | Yes / No / NC | Yes / No / NC | Yes / No / NC | Yes / No / NC | Yes / No / NC | R / W / NC    |
| XX. Movement on simulation/ No movement / less movement                                                                                                          | Yes / No / NC | Yes / No / NC | Yes / No / NC | Yes / No / NC | Yes / No / NC | Yes / No / NC | Yes / No / NC | Yes / No / NC | R / W / NC    |
| XXI. Low body weight                                                                                                                                             | < 2000gms     |               | < 2100gms     | < 2100gms     | < 2200gms     | <2300gms      | <2500gms      | <2500gms      | <2500gms      |
|                                                                                                                                                                  | Yes / No / NC | Yes / No / NC | Yes / No / NC | Yes / No / NC | Yes / No / NC | Yes / No / NC | Yes / No / NC | Yes / No / NC | R / W / NC    |
| XXII. $\geq$ 10 Skin pustules Or a big Boil                                                                                                                      | Yes / No / NC | Yes / No / NC | Yes / No / NC | Yes / No / NC | Yes / No / NC | Yes / No / NC | Yes / No / NC | Yes / No / NC | R / W / NC    |
| XXIII. Palms/soles/ body yellow?                                                                                                                                 | Yes / No / NC | Yes / No / NC | Yes / No / NC | Yes / No / NC | Yes / No / NC | Yes / No / NC | Yes / No / NC | Yes / No / NC | R / W / NC    |
| XXIV. Lips/ face/ Body became blue                                                                                                                               | Yes / No / NC | Yes / No / NC | Yes / No / NC | Yes / No / NC | Yes / No / NC | Yes / No / NC | Yes / No / NC | Yes / No / NC | R / W / NC    |
| XXV. Umbilicus bleeding                                                                                                                                          | Yes / No / NC | Yes / No / NC | Yes / No / NC | Yes / No / NC | Yes / No / NC | Yes / No / NC | Yes / No / NC | Yes / No / NC | R / W / NC    |
| XXVI. Did not urinate within 24 hrs of birth                                                                                                                     | Yes / No / NC |               |               |               |               |               |               |               | R / W / NC    |
| XXVII. Did not passed stool within 48 hrs of birth                                                                                                               | Yes / No / NC | Yes / No / NC |               |               |               |               |               |               | R / W / NC    |
| XVIII. Blood in stool                                                                                                                                            | Yes / No / NC | Yes / No / NC | Yes / No / NC | Yes / No / NC | Yes / No / NC | Yes / No / NC | Yes / No / NC | Yes / No / NC | R / W / NC    |
| XXIX. Watery diaherroea more than 3 times in a day with symptoms of dehydration                                                                                  | Yes / No / NC | Yes / No / NC | Yes / No / NC | Yes / No / NC | Yes / No / NC | Yes / No / NC | Yes / No / NC | Yes / No / NC | R / W / NC    |

Country ID:

Site ID:

FORM ID:

POSTNATAL (HBPNC) HOME VISIT RECORD

2

Implementation Research On Management Of Possible Serious Bacterial Infection (PSBI) In Young Infants (0-59 Days) Where Referral Is Not Feasible

Fill this section if the infant is referred By ASHA and the information is documented in HBPNC form

| 37. Did ASHA refer the infant? | 38. If yes, date of referral | 39. Place of referral | 40. Was the infant taken for treatment | 41. If yes, did the family use 102 service? | 42. If yes, where was he infant taken for treatment? | 43. If not, what was the reason                                                  | 44. Outcome                | 45. Supervisor's check |
|--------------------------------|------------------------------|-----------------------|----------------------------------------|---------------------------------------------|------------------------------------------------------|----------------------------------------------------------------------------------|----------------------------|------------------------|
| Yes / No / NC                  | / /                          |                       | Yes / No<br>( if no, skip to 45)       | Yes/ No                                     | SNCU / Other<br>Govt. Institution/<br>Private/ other | Ambulance not available/<br>can not decide / lack of<br>cash/ home remedy/ other | Healthy/ Sick/<br>died/ NC | R/ W / NC              |
|                                |                              |                       |                                        |                                             |                                                      |                                                                                  |                            |                        |

## Verification of ASHA's HBNC Visits

| Verification |                                                                         | 46. Pre delivery visit Verification | 47. Day 1 Verification | 48. Day 3 Verification | 49. Day 7 Verification | 50. Day 14 Verification | 51. Day 21 Verification | 52. Day 28 Verification | 53. Day 42 Verification | 54. Day 59 Verification | 55. Supervisor's check |
|--------------|-------------------------------------------------------------------------|-------------------------------------|------------------------|------------------------|------------------------|-------------------------|-------------------------|-------------------------|-------------------------|-------------------------|------------------------|
| I.           | Signed by Mother                                                        | Yes / No                            | Yes / No               | Yes / No               | Yes / No               | Yes / No                | Yes / No                | Yes / No                | Yes / No                | Yes / No                | R/ W / NC              |
| II.          | Date of verification by mother<br>( write 99/99/99 if no date)          | / /                                 | / /                    | / /                    | / /                    | / /                     | / /                     | / /                     | / /                     | / /                     |                        |
| III.         | Signed by ASHA supervisor                                               | Yes / No                            | Yes / No               | Yes / No               | Yes / No               | Yes / No                | Yes / No                | Yes / No                | Yes / No                | Yes / No                |                        |
| IV.          | Date of verification by ASHA supervisor<br>( write 99/99/99 if no date) | / /                                 | / /                    | / /                    | / /                    | / /                     | / /                     | / /                     | / /                     | / /                     |                        |

## Fill this section if the Family moved away

|                         |                        |                                   |                                           |
|-------------------------|------------------------|-----------------------------------|-------------------------------------------|
| 56. Migrated – Yes / No | 57. Date of Migration- | 58. Place of Migration (ADDRESS)- | 59. Name of the HH head (where migrated)- |
|-------------------------|------------------------|-----------------------------------|-------------------------------------------|

|                  |                                                |                   |                      |                |                                                |                   |                      |
|------------------|------------------------------------------------|-------------------|----------------------|----------------|------------------------------------------------|-------------------|----------------------|
| 60. Completed by | <input type="text"/><br>(Initial of name only) | Date (dd/mm/yyyy) | <input type="text"/> | 61. Entered by | <input type="text"/><br>(Initial of name only) | Date (dd/mm/yyyy) | <input type="text"/> |
| 62. Checked by   | <input type="text"/><br>(Initial of name only) | Date (dd/mm/yyyy) | <input type="text"/> | 63. Entered by | <input type="text"/><br>(Initial of name only) | Date (dd/mm/yyyy) | <input type="text"/> |
