# Supplementary material for: Management of possible serious bacterial infection in young infants closer to home when referral is not feasible: Lessons from implementation research in Himachal Pradesh, India
Source: PubMed Central journal article supplement (PMC7755274; doi:10.1371/journal.pone.0243724), 2020-12-22
Supplement: pone.0243724.s003.pdf [file pone.0243724.s003.pdf]

**Implementation Research on Management of Possible Serious Bacterial Infection (PSBI) in Young Infants (0-59 Days) where Referral is Not Feasible**

|                                              |                                                                                                                                                                                                                                                           |                       |
|----------------------------------------------|-----------------------------------------------------------------------------------------------------------------------------------------------------------------------------------------------------------------------------------------------------------|-----------------------|
| A. Infants Name .....                        | B. Mother's Name .....                                                                                                                                                                                                                                    | C. Father's Name..... |
| D. Village.....                              | E. Family Phone No <input type="text"/> | F. ASHAs Name:.....   |
| F. Assessor's Name .....                     | G. Infant's problems (as mentioned by mother/caregiver).....                                                                                                                                                                                              |                       |
| (This section NOT to be entered in database) |                                                                                                                                                                                                                                                           |                       |

|                                                |                                                                                                                    |                                                         |                                                                                   |
|------------------------------------------------|--------------------------------------------------------------------------------------------------------------------|---------------------------------------------------------|-----------------------------------------------------------------------------------|
| 1. Infant's ID Number:                         | 2. Age: <input type="text"/> <input type="text"/> days                                                             | 3. Weight: <input type="text"/> <input type="text"/> kg | 4. Temperature: <input type="text"/> <input type="text"/> <input type="text"/> °C |
| 5. First visit for this illness - Yes / No     | 6. Assesment by - MO / Nurse / ANM / Others                                                                        |                                                         | Others-                                                                           |
| 7. Place of Assessment - Home / PHC / CHC / DH | 8. PHC -                                                                                                           | 9. SC -                                                 |                                                                                   |
| 10. Assessment date - / /                      | 11. Assessment time - <input type="text"/> <input type="text"/> . <input type="text"/> <input type="text"/> AM/ PM |                                                         |                                                                                   |

**SECTION A**  
*This section will capture information on the signs which health worker documented to assess and classify sick newborn. The signs which are mentioned below, are also mentioned in " Treatment card: Management of Sepsis in Young Infant*

| <b>A 1. Checked For Possible Serious Bacterial Infection</b> |                                                                               |                                                                                                                                                                                       |
|--------------------------------------------------------------|-------------------------------------------------------------------------------|---------------------------------------------------------------------------------------------------------------------------------------------------------------------------------------|
|                                                              | <b>Assess</b>                                                                 | <b>Encircle the response</b>                                                                                                                                                          |
| 12.                                                          | Not able to feed or No breast attachment or not suckling at all               | Yes / No                                                                                                                                                                              |
| 13.                                                          | Less than normal movement                                                     | Yes / No                                                                                                                                                                              |
| 14.                                                          | Lethargic or unconscious                                                      | Yes / No                                                                                                                                                                              |
| 15.                                                          | Convulsions (fits)                                                            | Yes / No                                                                                                                                                                              |
| 16.                                                          | Fast breathing (> 60/min)                                                     | Yes / No                                                                                                                                                                              |
| 17.                                                          | Severe chest indrawing                                                        | Yes / No                                                                                                                                                                              |
| 18.                                                          | Nasal flaring?                                                                | Yes / No                                                                                                                                                                              |
| 19.                                                          | Grunting?                                                                     | Yes / No                                                                                                                                                                              |
| 20.                                                          | More than 10 skin postules or a big boil                                      | Yes / No                                                                                                                                                                              |
| 21.                                                          | Axillary temperature ≥ 37.5 °C OR temperature < 35.5°C                        | Yes / No                                                                                                                                                                              |
| 22.                                                          | Blood in stool                                                                | Yes / No                                                                                                                                                                              |
| 23.                                                          | Infant classified as<br>( As mentioned in Annexure section of Treatment card) | Critically ill.....01<br>Severe Clinical Infection.....02<br>Severe Pneumonia.....03<br>Pneumonia.....04<br>Local Infection.....05<br>None of the above.....06<br>Not captured.....99 |

**SECTION B**  
*The section gets populated, if Health workers /medical officer are using IMNCI assessment form to classify cases as per the state mandate.*

|                                                |            |                       |
|------------------------------------------------|------------|-----------------------|
| 24. Did the assessor use IMNCI recording form? | Yes.....01 |                       |
|                                                | No.....02  | <b>Skip to Sec. C</b> |

| <b>B- 1. Checked For PSBI OR Very Severe Disease and Local Infection</b> |                                            |                                                                              |              |
|--------------------------------------------------------------------------|--------------------------------------------|------------------------------------------------------------------------------|--------------|
|                                                                          | <b>Assess</b>                              | <b>Encircle the response</b>                                                 | <b>Skips</b> |
| 25.                                                                      | Is the infant having difficulty in feeding | Yes / No                                                                     |              |
| 26.                                                                      | Convulsions                                | Yes / No                                                                     |              |
| 27.                                                                      | Breath count (RR) in one minute            | <input type="text"/> <input type="text"/> ( write 99 if not captured)        |              |
| 28.                                                                      | Repeat breath count                        | <input type="text"/> <input type="text"/> ( write 99 if not captured)        |              |
| 29.                                                                      | Severe chest indrawing                     | Yes / No                                                                     |              |
| 30.                                                                      | Nasal Flaring                              | Yes / No                                                                     |              |
| 31.                                                                      | Grunting                                   | Yes / No                                                                     |              |
| 32.                                                                      | Body temperature                           | Fever (≥ 37.5°C ) <sub>1</sub> / low temp. (< 35.5°C ) <sub>2</sub>          |              |
| 33.                                                                      | Look at Infant's movement                  | Moves on own / When shimulated / No movement /less than normal / Unconscious |              |

**Implementation Research on Management of Possible Serious Bacterial Infection (PSBI) in Young Infants (0-59 Days) where Referral is Not Feasible**

|                                                                                                                                                                  |                                                                             |                                                                                                                                                                   |
|------------------------------------------------------------------------------------------------------------------------------------------------------------------|-----------------------------------------------------------------------------|-------------------------------------------------------------------------------------------------------------------------------------------------------------------|
| <b>34.</b>                                                                                                                                                       | Umbilicus draining pus                                                      | Yes / No                                                                                                                                                          |
| <b>35.</b>                                                                                                                                                       | Umbilicus is red                                                            | Yes / No                                                                                                                                                          |
| <b>36.</b>                                                                                                                                                       | Skin pustules                                                               | Yes / No                                                                                                                                                          |
| <b>37.</b>                                                                                                                                                       | Skin pustules                                                               | ≥10 / One Big pustule / < 10                                                                                                                                      |
| <b>38.</b>                                                                                                                                                       | Was infant also classified for local infection                              | Only PSBI Or VSD .....01<br>Only Local Infection.....02<br>Both PSBI and LI.....03<br>Fast Breathing.....04<br>PSBI OR LI unlikely.....05<br>Not captured .....99 |
| <b>B-2. Checked For Jaundice</b>                                                                                                                                 |                                                                             |                                                                                                                                                                   |
| <b>Assess</b>                                                                                                                                                    |                                                                             | <b>Encircle the response</b>                                                                                                                                      |
| <b>39.</b>                                                                                                                                                       | Did the infant assessed for jaundice?                                       | Yes / No                                                                                                                                                          |
| <b>40.</b>                                                                                                                                                       | When did the jaundice appear first?                                         | Within 24 hrs of birth / After 24 hrs of birth / Not captured                                                                                                     |
| <b>41.</b>                                                                                                                                                       | Yellow skin?                                                                | Yes / No                                                                                                                                                          |
| <b>42.</b>                                                                                                                                                       | Were palms or soles yellow?                                                 | Yes / No                                                                                                                                                          |
| <b>43.</b>                                                                                                                                                       | Was the infant classified for jaundice?                                     | Severe Jaundice.....01<br>Jaundice.....02<br>No Jaundice.....03<br>Not captured.....99                                                                            |
| <b>B-3. Asked For Diarrhoea and Looked For Dehydration (In Case Of Diarrhoea)</b>                                                                                |                                                                             |                                                                                                                                                                   |
| <b>Assess</b>                                                                                                                                                    |                                                                             | <b>Encircle the response</b>                                                                                                                                      |
| <b>44.</b>                                                                                                                                                       | Did the infant assessed for diarrhoea?                                      | Yes / No                                                                                                                                                          |
| <b>45.</b>                                                                                                                                                       | Did the infant have diarrhoea?                                              | Yes / No / Not captured                                                                                                                                           |
| <b>46.</b>                                                                                                                                                       | Did the infant has blood in stool                                           | Yes / No / Not captured                                                                                                                                           |
| <b>47.</b>                                                                                                                                                       | For how long ?                                                              | <input type="text"/> <input type="text"/> days ( 99 if not captured)                                                                                              |
| <b>48.</b>                                                                                                                                                       | How was the infant's movement?                                              | Restless or irritable / No movement / Only when stimulated / unconscious                                                                                          |
| <b>49.</b>                                                                                                                                                       | Were eyes sunken?                                                           | Yes / No                                                                                                                                                          |
| <b>50.</b>                                                                                                                                                       | Pinch the skin of the abdomen. Does it go back                              | Very slowly / Slowly                                                                                                                                              |
| <b>51.</b>                                                                                                                                                       | Was the infant classified for Dehydration?                                  | Severe dehydration.....01<br>Some dehydration.....02<br>No dehydration.....03<br>Not captured.....99                                                              |
| <b>B-4. Checked For Feeding Problem Or Low Weight For Age</b>                                                                                                    |                                                                             |                                                                                                                                                                   |
| <b>Assess</b>                                                                                                                                                    |                                                                             | <b>Encircle the response</b>                                                                                                                                      |
| <b>52.</b>                                                                                                                                                       | Did the infant assessed for feeding Prob. Or low weight?                    | Yes / No                                                                                                                                                          |
| <b>53.</b>                                                                                                                                                       | Is the infant breastfed?                                                    | Yes / No / Not captured                                                                                                                                           |
| <b>54.</b>                                                                                                                                                       | How many times in 24 hours the infant was breastfed?                        | <input type="text"/> <input type="text"/> (99 if not captured)                                                                                                    |
| <b>55.</b>                                                                                                                                                       | Does the infant usually receive any other foods/drinks?                     | Yes / No / Not captured                                                                                                                                           |
| <b>56.</b>                                                                                                                                                       | If other food/drinks, how often (in 24 hrs)?                                | <input type="text"/> <input type="text"/> (99 if not captured)                                                                                                    |
| <b>57.</b>                                                                                                                                                       | If yes, what do you use to feed the infant?                                 | Cup / Bottle / spoon / other / Not captured                                                                                                                       |
| <b>58.</b>                                                                                                                                                       | Determine weight for age. Is the weight low?                                | Very low / Low / Not low weight / NC                                                                                                                              |
| <b>59.</b>                                                                                                                                                       | Ulcers or white patches in mouth (thrush)?                                  | Yes / No                                                                                                                                                          |
| <b>60.</b>                                                                                                                                                       | Was the infant classified for having feeding problem or Low weight for age? | Very Low weight .....01<br>Feeding problem OR/and Low weight.....02<br>No feeding problem.....03<br>Not captured.....99                                           |
| <b>B-5. Assessed Breastfeeding</b>                                                                                                                               |                                                                             |                                                                                                                                                                   |
| <i>( Health workers should feel this section only if there is a feeding difficulty / taking other food or drinks /low weight for age / has no indications to</i> |                                                                             |                                                                                                                                                                   |

**Implementation Research on Management of Possible Serious Bacterial Infection (PSBI) in Young Infants (0-59 Days) where Referral is Not Feasible**

| <i>refer urgently to hospital)</i>                               |                                                                    |                   |
|------------------------------------------------------------------|--------------------------------------------------------------------|-------------------|
| Assess                                                           | Encircle the correct response                                      | Skips             |
| 61. Was the infant assess for breastfeeding?                     | Yes / No                                                           | If no, Skip to 70 |
| 62. Has the infant breastfed in the previous hour?               | Yes / No / Not captured                                            | If No, Skip to 64 |
| 63. If breastfed in previous hour, was feeding assessed further? | Yes / No                                                           | If no, Skip to 70 |
| 64. More areola seen above top lip than below bottom lip?        | Yes / No / Not captured                                            |                   |
| 65. Mouth wide open                                              | Yes / No / Not captured                                            |                   |
| 66. Lower lip turned outwards                                    | Yes / No / Not captured                                            |                   |
| 67. Chin touching breast                                         | Yes / No / Not captured                                            |                   |
| 68. How the infant was attached to breast?                       | Good / Poor / No attachment / Not captured                         |                   |
| 69. How the infant was suckling                                  | Effectively / Not effectively / Not suckling at all / Not captured |                   |

**B- 6. Check Infant's Immunization Status**

| Assess                                 | Encircle the correct response                                                                                                                             | Skips |
|----------------------------------------|-----------------------------------------------------------------------------------------------------------------------------------------------------------|-------|
| 70. BCG 0                              | Yes / No / Not captured                                                                                                                                   |       |
| 71. Hep B0                             | Yes / No / Not captured                                                                                                                                   |       |
| 72. OPV 0                              | Yes / No / Not captured                                                                                                                                   |       |
| 73. Pentavalent 1                      | Yes / No / Not captured                                                                                                                                   |       |
| 74. Hep B1                             |                                                                                                                                                           |       |
| 75. OPV 1                              | Yes / No / Not captured                                                                                                                                   |       |
| 76. Rotavirus 1                        | Yes / No / Not captured                                                                                                                                   |       |
| 77. PCV 1                              | Yes / No / Not captured                                                                                                                                   |       |
| 78. What was next date of immunization | <input type="checkbox"/> <input type="checkbox"/> / <input type="checkbox"/> <input type="checkbox"/> / <input type="checkbox"/> <input type="checkbox"/> |       |

**Section C: ( Mandatory)**

The information for this section shall be sourced from "Treatment card: Management of Sepsis in Young Infant". ANMS are mandated to refer all PSBI cases to hospitals and if they refuse referral then ANM /MO should offer an outpatient 7 days PSBI treatment regimen which should be documented in PSBI treatment card.

| Assess                                                                                            | Response                                                                                                                                                                         | Skips                                  |
|---------------------------------------------------------------------------------------------------|----------------------------------------------------------------------------------------------------------------------------------------------------------------------------------|----------------------------------------|
| 79. Advised on referral to nearest HF and care during referral?                                   | Yes / No / Not captured                                                                                                                                                          | If no, STOP Here                       |
| 80. Write the name of the facility to which referral was made ( Ask health worker)                |                                                                                                                                                                                  |                                        |
| 81. Pre-referral dose of antibiotics given                                                        | Yes / No / Not captured                                                                                                                                                          | If Yes , Skip to 84                    |
| 82. If no pre-referral dose given, ask for the reason ( ASK health worker)                        | Dose not available.....01<br>Syringe not available.....02<br>Not confident to give the dose.....03<br>Refused .....04<br>Other ..... 88                                          |                                        |
| 83. If pre-referral dose refused / other, what was the reason? ( ASK health worker)               |                                                                                                                                                                                  |                                        |
| 84. Informed young infant's condition to MO/SN                                                    | Yes / No / Not captured / NA                                                                                                                                                     |                                        |
| 85. Patient refused referral                                                                      | Yes / No / Not captured                                                                                                                                                          | If NO, STOP Here<br>If Yes, Skip to 88 |
| 86. If refused, what was the reason ( ASK health worker)                                          | Hospital is too far.....01<br>Lack of time if hospitalized.....02<br>Cannot afford transport.....03<br>Cannot afford hospitalization.....04<br>Undecided .....05<br>Other.....88 |                                        |
| 87. If other , please elaborate the reason ( ASK health worker)                                   |                                                                                                                                                                                  |                                        |
| 88. Did health-worker offered the infant 7 days Outpatient simple treatment? ( ASK health worker) | Yes / No                                                                                                                                                                         | If yes skip to 90                      |

Site ID:

Country ID:

Form ID:

Implementation Research on Management of Possible Serious Bacterial Infection (PSBI) in Young Infants (0-59 Days) where Referral is Not Feasible

|     |                                                         |          |                  |
|-----|---------------------------------------------------------|----------|------------------|
| 89. | If no, what was the reason (ASK health worker)          |          |                  |
| 90. | Did the family accept the treatment (ASK health worker) | Yes / No | If Yes STOP HERE |
| 91. | If no, what was the reason? (ASK health worker)         |          |                  |

|     |                   |                                                                  |                   |                                                                                                                                                                             |
|-----|-------------------|------------------------------------------------------------------|-------------------|-----------------------------------------------------------------------------------------------------------------------------------------------------------------------------|
| 92. | Form completed by | <input type="text"/> <input type="text"/> (Initial of name only) | Date (dd/mm/yyyy) | <input type="text"/> <input type="text"/> / <input type="text"/> <input type="text"/> / <input type="text"/> <input type="text"/> <input type="text"/> <input type="text"/> |
| 93. | Form checked by   | <input type="text"/> <input type="text"/> (Initial of name only) | Date (dd/mm/yyyy) | <input type="text"/> <input type="text"/> / <input type="text"/> <input type="text"/> / <input type="text"/> <input type="text"/> <input type="text"/> <input type="text"/> |
| 94. | Form entered by   | <input type="text"/> <input type="text"/> (Initial of name only) | Date (dd/mm/yyyy) | <input type="text"/> <input type="text"/> / <input type="text"/> <input type="text"/> / <input type="text"/> <input type="text"/> <input type="text"/> <input type="text"/> |
| 95. | Form entered by   | <input type="text"/> <input type="text"/> (Initial of name only) | Date (dd/mm/yyyy) | <input type="text"/> <input type="text"/> / <input type="text"/> <input type="text"/> / <input type="text"/> <input type="text"/> <input type="text"/> <input type="text"/> |

**END of THH FORM**
