# Supplementary material for: Management of possible serious bacterial infection in young infants closer to home when referral is not feasible: Lessons from implementation research in Himachal Pradesh, India
Source: PubMed Central journal article supplement (PMC7755274; doi:10.1371/journal.pone.0243724), 2020-12-22
Supplement: pone.0243724.s004.pdf [file pone.0243724.s004.pdf]

### Implementation Research on Management of Possible Serious Bacterial Infection (PSBI) In Young Infants (0-59 Days) Where Referral Is Not Feasible

[To be filled by the research team from the infant treatment card and register maintained at the health centre]

#### INFANT AND HEALTH WORKER IDENTIFYING INFORMATION

|        |        |               |            |               |
|--------|--------|---------------|------------|---------------|
| 1. CHC | 2. PHC | 3. Sub-Centre | 4. Village | 5. Infant ID: |
|--------|--------|---------------|------------|---------------|

| GENERAL    |                                                                          |                   |                                                            |                                                             |                                                             |                                                             |                                                                   |                                                                   |                                                                   |                                                                   |                                                                   |
|------------|--------------------------------------------------------------------------|-------------------|------------------------------------------------------------|-------------------------------------------------------------|-------------------------------------------------------------|-------------------------------------------------------------|-------------------------------------------------------------------|-------------------------------------------------------------------|-------------------------------------------------------------------|-------------------------------------------------------------------|-------------------------------------------------------------------|
| Day number |                                                                          | Day 1             | Day 2                                                      | Day 3                                                       | Day 4                                                       | Day 5                                                       | Day 6                                                             | Day 7                                                             |                                                                   |                                                                   |                                                                   |
| 6.         | Date of follow-up visit (dd/mm/yyyy)                                     |                   | / /                                                        | / /                                                         | / /                                                         | / /                                                         | / /                                                               | / /                                                               | / /                                                               |                                                                   |                                                                   |
| 7.         | Time of follow-up visit (hh:mm)                                          |                   | AM/PM                                                      | AM/PM                                                       | AM/PM                                                       | AM/PM                                                       | AM/PM                                                             | AM/PM                                                             | AM/PM                                                             | AM/PM                                                             | AM/PM                                                             |
| 8.         | Follow-up carried out at                                                 |                   | SC / PHC /<br>CHC / DH                                     | SC / PHC / CHC<br>/ DH                                      | SC / PHC /<br>CHC / DH                                      | SC / PHC /<br>CHC / DH                                      | SC / PHC /<br>CHC / DH                                            | SC / PHC /<br>CHC / DH                                            | SC / PHC /<br>CHC / DH                                            | SC / PHC /<br>CHC / DH                                            | SC / PHC /<br>CHC / DH                                            |
|            | 1                                                                        | Health facility   | Yes / No                                                   | Yes / No                                                    | Yes / No                                                    | Yes / No                                                    | Yes / No                                                          | Yes / No                                                          | Yes / No                                                          | Yes / No                                                          | Yes / No                                                          |
|            | 2                                                                        | Home              | Yes / No                                                   | Yes / No                                                    | Yes / No                                                    | Yes / No                                                    | Yes / No                                                          | Yes / No                                                          | Yes / No                                                          | Yes / No                                                          | Yes / No                                                          |
| 9.         | Visit status (home visit)<br>(one answer only)                           |                   | 1.                                                         | Infant assessed during visit                                | Yes / No                                                    | Yes / No                                                    | Yes / No                                                          | Yes / No                                                          | Yes / No                                                          | Yes / No                                                          | Yes / No                                                          |
|            |                                                                          |                   | 2                                                          | Infant temporarily away from home                           | Yes / No                                                    | Yes / No                                                    | Yes / No                                                          | Yes / No                                                          | Yes / No                                                          | Yes / No                                                          | Yes / No                                                          |
|            |                                                                          |                   | 3                                                          | Nobody at home                                              | Yes / No                                                    | Yes / No                                                    | Yes / No                                                          | Yes / No                                                          | Yes / No                                                          | Yes / No                                                          | Yes / No                                                          |
|            |                                                                          |                   | 4                                                          | Refused to be assessed                                      | Yes / No                                                    | Yes / No                                                    | Yes / No                                                          | Yes / No                                                          | Yes / No                                                          | Yes / No                                                          | Yes / No                                                          |
|            |                                                                          |                   | 5                                                          | Infant died                                                 | Yes / No                                                    | Yes / No                                                    | Yes / No                                                          | Yes / No                                                          | Yes / No                                                          | Yes / No                                                          | Yes / No                                                          |
|            |                                                                          |                   | 6                                                          | Infant is hospitalized                                      | Yes / No                                                    | Yes / No                                                    | Yes / No                                                          | Yes / No                                                          | Yes / No                                                          | Yes / No                                                          | Yes / No                                                          |
|            |                                                                          |                   | 7                                                          | Other (specify)                                             | Yes / No                                                    | Yes / No                                                    | Yes / No                                                          | Yes / No                                                          | Yes / No                                                          | Yes / No                                                          | Yes / No                                                          |
| 10.        | Adult primary respondent                                                 |                   | Father/<br>Mother<br>/Other                                | Father/ Mother<br>/Other                                    | Father/<br>Mother /Other                                    | Father/<br>Mother /Other                                    | Father/<br>Mother<br>/Other                                       | Father/<br>Mother<br>/Other                                       | Father/<br>Mother<br>/Other                                       | Father/<br>Mother<br>/Other                                       |                                                                   |
|            | 10.1.                                                                    | If other specify: |                                                            |                                                             |                                                             |                                                             |                                                                   |                                                                   |                                                                   |                                                                   |                                                                   |
| 11.        | How is the infant today? (Respondent's perception of infant's condition) |                   | Same / Better<br>/Worsened/<br>Cured / Died/<br>Don't know | Same / Better<br>/Worsened /<br>Cured / Died/<br>Don't know | Same / Better<br>/Worsened /<br>Cured / Died/<br>Don't know | Same / Better<br>/Worsened /<br>Cured / Died/<br>Don't know | Same /<br>Better<br>/Worsened /<br>Cured /<br>Died/ Don't<br>know | Same /<br>Better<br>/Worsened<br>/ Cured /<br>Died/ Don't<br>know | Same /<br>Better<br>/Worsened /<br>Cured /<br>Died/ Don't<br>know | Same /<br>Better<br>/Worsened /<br>Cured /<br>Died/ Don't<br>know | Same /<br>Better<br>/Worsened /<br>Cured /<br>Died/ Don't<br>know |

| Day number                                                                                                                    |                                                                                                                                                                                                                                                                  | Day 1      | Day 2                                                                                                                                                                    | Day 3                                          | Day 4                                          | Day 5                                          | Day 6                                          | Day 7                                          |                                                |                                                |                                                |
|-------------------------------------------------------------------------------------------------------------------------------|------------------------------------------------------------------------------------------------------------------------------------------------------------------------------------------------------------------------------------------------------------------|------------|--------------------------------------------------------------------------------------------------------------------------------------------------------------------------|------------------------------------------------|------------------------------------------------|------------------------------------------------|------------------------------------------------|------------------------------------------------|------------------------------------------------|------------------------------------------------|------------------------------------------------|
| <b>SIGNS OF PSBI ( Y = Yes , N= No , NC = Not captured)</b>                                                                   |                                                                                                                                                                                                                                                                  |            |                                                                                                                                                                          |                                                |                                                |                                                |                                                |                                                |                                                |                                                |                                                |
| 12.                                                                                                                           | Not able to feed or No breast attachment or not suckling at all                                                                                                                                                                                                  | Y / N / NC | Y / N / NC                                                                                                                                                               | Y / N / NC                                     | Y / N / NC                                     | Y / N / NC                                     | Y / N / NC                                     | Y / N / NC                                     | Y / N / NC                                     | Y / N / NC                                     |                                                |
| 13.                                                                                                                           | Less than normal movement                                                                                                                                                                                                                                        | Y / N / NC | Y / N / NC                                                                                                                                                               | Y / N / NC                                     | Y / N / NC                                     | Y / N / NC                                     | Y / N / NC                                     | Y / N / NC                                     | Y / N / NC                                     | Y / N / NC                                     |                                                |
| 14.                                                                                                                           | Lethargic or unconscious                                                                                                                                                                                                                                         | Y / N / NC | Y / N / NC                                                                                                                                                               | Y / N / NC                                     | Y / N / NC                                     | Y / N / NC                                     | Y / N / NC                                     | Y / N / NC                                     | Y / N / NC                                     | Y / N / NC                                     |                                                |
| 15.                                                                                                                           | Convulsions (fits)                                                                                                                                                                                                                                               | Y / N / NC | Y / N / NC                                                                                                                                                               | Y / N / NC                                     | Y / N / NC                                     | Y / N / NC                                     | Y / N / NC                                     | Y / N / NC                                     | Y / N / NC                                     | Y / N / NC                                     |                                                |
| 16.                                                                                                                           | Fast breathing ( $\geq 60$ /mins)                                                                                                                                                                                                                                | Y / N / NC | Y / N / NC                                                                                                                                                               | Y / N / NC                                     | Y / N / NC                                     | Y / N / NC                                     | Y / N / NC                                     | Y / N / NC                                     | Y / N / NC                                     | Y / N / NC                                     |                                                |
| 17.                                                                                                                           | Severe chest indrawing                                                                                                                                                                                                                                           | Y / N / NC | Y / N / NC                                                                                                                                                               | Y / N / NC                                     | Y / N / NC                                     | Y / N / NC                                     | Y / N / NC                                     | Y / N / NC                                     | Y / N / NC                                     | Y / N / NC                                     |                                                |
| 18.                                                                                                                           | Nasal Flaring                                                                                                                                                                                                                                                    | Y / N / NC | Y / N / NC                                                                                                                                                               | Y / N / NC                                     | Y / N / NC                                     | Y / N / NC                                     | Y / N / NC                                     | Y / N / NC                                     | Y / N / NC                                     | Y / N / NC                                     |                                                |
| 19.                                                                                                                           | Grunting                                                                                                                                                                                                                                                         | Y / N / NC | Y / N / NC                                                                                                                                                               | Y / N / NC                                     | Y / N / NC                                     | Y / N / NC                                     | Y / N / NC                                     | Y / N / NC                                     | Y / N / NC                                     | Y / N / NC                                     |                                                |
| 20.                                                                                                                           | More than 10 skin pustules or a big boil                                                                                                                                                                                                                         | Y / N / NC | Y / N / NC                                                                                                                                                               | Y / N / NC                                     | Y / N / NC                                     | Y / N / NC                                     | Y / N / NC                                     | Y / N / NC                                     | Y / N / NC                                     | Y / N / NC                                     |                                                |
| 21.                                                                                                                           | Axillary temperature $\geq 37.5$ °C OR temperature $< 35.5$ °C                                                                                                                                                                                                   | Y / N / NC | Y / N / NC                                                                                                                                                               | Y / N / NC                                     | Y / N / NC                                     | Y / N / NC                                     | Y / N / NC                                     | Y / N / NC                                     | Y / N / NC                                     | Y / N / NC                                     |                                                |
| 22.                                                                                                                           | Blood in stool                                                                                                                                                                                                                                                   | Y / N / NC | Y / N / NC                                                                                                                                                               | Y / N / NC                                     | Y / N / NC                                     | Y / N / NC                                     | Y / N / NC                                     | Y / N / NC                                     | Y / N / NC                                     | Y / N / NC                                     |                                                |
| <b>SIMPLIFIED ANTIBIOTIC TREATMENT GIVEN</b>                                                                                  |                                                                                                                                                                                                                                                                  |            |                                                                                                                                                                          |                                                |                                                |                                                |                                                |                                                |                                                |                                                |                                                |
| <b>IF TREATMENT FAILURE OR SEVERE ADVERSE EVENT NEEDING REFERRAL/CHANGE OF THERAPY PUT DOUBLE LINE THROUGH REMAINING DAYS</b> |                                                                                                                                                                                                                                                                  |            |                                                                                                                                                                          |                                                |                                                |                                                |                                                |                                                |                                                |                                                |                                                |
| 23.                                                                                                                           | Gentamicin                                                                                                                                                                                                                                                       | Dose       | <input type="text"/> <input type="text"/> <input type="text"/> <input type="text"/> mL                                                                                   | Y / N / Partially / DNK                        | Y / N / Partially / DNK                        | Y / N / Partially / DNK                        | Y / N / Partially / DNK                        | Y / N / Partially / DNK                        | Y / N / Partially / DNK                        | Y / N / Partially / DNK                        | Y / N / Partially / DNK                        |
| 24.                                                                                                                           | Ampicillin                                                                                                                                                                                                                                                       | Dose       | <input type="text"/> <input type="text"/> <input type="text"/> <input type="text"/> mL                                                                                   | Y / N / Partially / DNK                        | Y / N / Partially / DNK                        | Y / N / Partially / DNK                        | Y / N / Partially / DNK                        | Y / N / Partially / DNK                        | Y / N / Partially / DNK                        | Y / N / Partially / DNK                        | Y / N / Partially / DNK                        |
| 25.                                                                                                                           | Ampicillin                                                                                                                                                                                                                                                       | Dose       | <input type="text"/> <input type="text"/> <input type="text"/> <input type="text"/> mL                                                                                   | Y / N / Partially / DNK                        | Y / N / Partially / DNK                        | Y / N / Partially / DNK                        | Y / N / Partially / DNK                        | Y / N / Partially / DNK                        | Y / N / Partially / DNK                        | Y / N / Partially / DNK                        | Y / N / Partially / DNK                        |
| 26.                                                                                                                           | Amoxicillin                                                                                                                                                                                                                                                      | Dose       | Syrup <input type="text"/> <input type="text"/> <input type="text"/> <input type="text"/> mL<br>Distab <input type="text"/> <input type="text"/> <input type="text"/> mg | Y / N / Partially / DNK                        | Y / N / Partially / DNK                        | Y / N / Partially / DNK                        | Y / N / Partially / DNK                        | Y / N / Partially / DNK                        | Y / N / Partially / DNK                        | Y / N / Partially / DNK                        | Y / N / Partially / DNK                        |
| 27.                                                                                                                           | Amoxicillin                                                                                                                                                                                                                                                      | Dose       | Syrup <input type="text"/> <input type="text"/> <input type="text"/> <input type="text"/> mL<br>Distab <input type="text"/> <input type="text"/> <input type="text"/> mg | Given/ Partially Given/ Not given/ do not know | Given/ Partially Given/ Not given/ do not know | Given/ Partially Given/ Not given/ do not know | Given/ Partially Given/ Not given/ do not know | Given/ Partially Given/ Not given/ do not know | Given/ Partially Given/ Not given/ do not know | Given/ Partially Given/ Not given/ do not know | Given/ Partially Given/ Not given/ do not know |
| 28.                                                                                                                           | For how many days did the infant receive A. Inj. Gentamicin <input type="text"/> <input type="text"/> B. Inj. Ampicillin <input type="text"/> <input type="text"/> C. Syrup Amoxicillin <input type="text"/> <input type="text"/> ( write N/A if not applicable) |            |                                                                                                                                                                          |                                                |                                                |                                                |                                                |                                                |                                                |                                                |                                                |

Country ID

Site ID

Form ID

FACILITY FOLLOW UP FORM

4

|     |                                                |                    |                      |                      |                    |                      |                      |                      |                      |                      |                                |
|-----|------------------------------------------------|--------------------|----------------------|----------------------|--------------------|----------------------|----------------------|----------------------|----------------------|----------------------|--------------------------------|
| 29. | How many complete doses did the infant receive | A. Inj. Gentamicin | <input type="text"/> | <input type="text"/> | B. Inj. Ampicillin | <input type="text"/> | <input type="text"/> | C. Syrup Amoxicillin | <input type="text"/> | <input type="text"/> | ( write N/A if not applicable) |
|-----|------------------------------------------------|--------------------|----------------------|----------------------|--------------------|----------------------|----------------------|----------------------|----------------------|----------------------|--------------------------------|

| Day number                                                 |                          | 1         | 2         | 3         | 4         | 5         | 6         | 7         |           |           |
|------------------------------------------------------------|--------------------------|-----------|-----------|-----------|-----------|-----------|-----------|-----------|-----------|-----------|
| <b>ADVERSE EVENTS ( Y = Yes ; N= No; DNK= Do not Know)</b> |                          |           |           |           |           |           |           |           |           |           |
| 30.                                                        | Diarrhea                 | Y/ N/ DNK | Y/ N/ DNK | Y/ N/ DNK | Y/ N/ DNK | Y/ N/ DNK | Y/ N/ DNK | Y/ N/ DNK | Y/ N/ DNK | Y/ N/ DNK |
| 31.                                                        | Reduced urine output     | Y/ N/ DNK | Y/ N/ DNK | Y/ N/ DNK | Y/ N/ DNK | Y/ N/ DNK | Y/ N/ DNK | Y/ N/ DNK | Y/ N/ DNK | Y/ N/ DNK |
| 32.                                                        | Injection site infection | Y/ N/ DNK | Y/ N/ DNK | Y/ N/ DNK | Y/ N/ DNK | Y/ N/ DNK | Y/ N/ DNK | Y/ N/ DNK | Y/ N/ DNK | Y/ N/ DNK |
| 33.                                                        | Injection site abscess   | Y/ N/ DNK | Y/ N/ DNK | Y/ N/ DNK | Y/ N/ DNK | Y/ N/ DNK | Y/ N/ DNK | Y/ N/ DNK | Y/ N/ DNK | Y/ N/ DNK |
| 34.                                                        | Any other                | Y/ N/ DNK | Y/ N/ DNK | Y/ N/ DNK | Y/ N/ DNK | Y/ N/ DNK | Y/ N/ DNK | Y/ N/ DNK | Y/ N/ DNK | Y/ N/ DNK |
| 35.                                                        | (If Other, specify)      |           |           |           |           |           |           |           |           |           |

| <b>OUTCOME OF THIS VISIT</b> |                                                                                   |                                                              |                                                              |                                                              |                                                              |                                                              |                                                              |                                                              |                                                              |                                                              |
|------------------------------|-----------------------------------------------------------------------------------|--------------------------------------------------------------|--------------------------------------------------------------|--------------------------------------------------------------|--------------------------------------------------------------|--------------------------------------------------------------|--------------------------------------------------------------|--------------------------------------------------------------|--------------------------------------------------------------|--------------------------------------------------------------|
| 36.                          | What is infants' condition since previous assessment? (Health workers assessment) | Same / Better / Worsened / Cured / Died / Don't know         | Same / Better / Worsened / Cured / Died / Don't know         | Same / Better / Worsened / Cured / Died / Don't know         | Same / Better / Worsened / Cured / Died / Don't know         | Same / Better / Worsened / Cured / Died / Don't know         | Same / Better / Worsened / Cured / Died / Don't know         | Same / Better / Worsened / Cured / Died / Don't know         | Same / Better / Worsened / Cured / Died / Don't know         | Same / Better / Worsened / Cured / Died / Don't know         |
| 37.                          | <b>ACTION TAKEN BY HEALTH WORKER</b>                                              | Treatment continuing; / Referred /patient left / Cured/ Died | Treatment continuing; / Referred /patient left / Cured/ Died | Treatment continuing; / Referred /patient left / Cured/ Died | Treatment continuing; / Referred /patient left / Cured/ Died | Treatment continuing; / Referred /patient left / Cured/ Died | Treatment continuing; / Referred /patient left / Cured/ Died | Treatment continuing; / Referred /patient left / Cured/ Died | Treatment continuing; / Referred /patient left / Cured/ Died | Treatment continuing; / Referred /patient left / Cured/ Died |
| 38.                          | <b>If referred to higher facility, Name and address of the facility</b>           |                                                              |                                                              |                                                              |                                                              |                                                              |                                                              |                                                              |                                                              |                                                              |

|     |                   |                      |                      |                        |                   |                      |                      |                      |                      |                      |                      |
|-----|-------------------|----------------------|----------------------|------------------------|-------------------|----------------------|----------------------|----------------------|----------------------|----------------------|----------------------|
| 39. | Form completed by | <input type="text"/> | <input type="text"/> | (Initial of name only) | Date (dd/mm/yyyy) | <input type="text"/> | <input type="text"/> | <input type="text"/> | <input type="text"/> | <input type="text"/> | <input type="text"/> |
| 40. | Form checked by   | <input type="text"/> | <input type="text"/> | (Initial of name only) | Date (dd/mm/yyyy) | <input type="text"/> | <input type="text"/> | <input type="text"/> | <input type="text"/> | <input type="text"/> | <input type="text"/> |
| 41. | Form entered by   | <input type="text"/> | <input type="text"/> | (Initial of name only) | Date (dd/mm/yyyy) | <input type="text"/> | <input type="text"/> | <input type="text"/> | <input type="text"/> | <input type="text"/> | <input type="text"/> |
| 42. | Form entered by   | <input type="text"/> | <input type="text"/> | (Initial of name only) | Date (dd/mm/yyyy) | <input type="text"/> | <input type="text"/> | <input type="text"/> | <input type="text"/> | <input type="text"/> | <input type="text"/> |
