# Supplementary material for: Management of possible serious bacterial infection in young infants closer to home when referral is not feasible: Lessons from implementation research in Himachal Pradesh, India
Source: PubMed Central journal article supplement (PMC7755274; doi:10.1371/journal.pone.0243724), 2020-12-22
Supplement: pone.0243724.s005.pdf [file pone.0243724.s005.pdf]

Country ID:

State ID:

Form ID:

Sick Newborn Home Visit

5

## Implementation Research on Management of Possible Serious Bacterial Infection (PSBI) In Young Infants (0-59 Days) Where Referral Is Not Feasible

## A. Infant Identification

|            |              |         |
|------------|--------------|---------|
| 1. CHC     | 2. PHC       | 3. SC   |
| 4. Village | 5. Infant ID | 6. ASHA |

## B. First contact ( Fill Q. 7 to Q. 18)

| Sl. no. | Questions                                                                  | Response                                                                                                                                                                    | Skip / Remark |
|---------|----------------------------------------------------------------------------|-----------------------------------------------------------------------------------------------------------------------------------------------------------------------------|---------------|
| 7.      | First contact Date<br>(dd/mm/yyyy)                                         | <input type="text"/> <input type="text"/> / <input type="text"/> <input type="text"/> / <input type="text"/> <input type="text"/> <input type="text"/> <input type="text"/> |               |
| 8.      | Status of the infant at the time of first contact (one answer only)        | Infant is available.....01                                                                                                                                                  |               |
|         |                                                                            | Infant died .....02                                                                                                                                                         |               |
|         |                                                                            | Infant is hospitalized.....03                                                                                                                                               |               |
|         |                                                                            | Refused to give information..... 04                                                                                                                                         |               |
|         |                                                                            | Other .....88<br>(Specify )                                                                                                                                                 |               |
| 9.      | Adult primary respondent ( First contact)                                  | Father.....01                                                                                                                                                               |               |
|         |                                                                            | Mother.....02                                                                                                                                                               |               |
|         |                                                                            | Other .....88<br>(Specify )                                                                                                                                                 |               |
| 10.     | When did the child fall sick?<br>(Date of onset – current illness episode) | <input type="text"/> <input type="text"/> / <input type="text"/> <input type="text"/> / <input type="text"/> <input type="text"/> <input type="text"/> <input type="text"/> |               |
| 11.     | Who noticed/ told you that the child was sick?                             | Mother noticed.....01                                                                                                                                                       |               |
|         |                                                                            | Other family member.....02                                                                                                                                                  |               |
|         |                                                                            | ASHA.....03                                                                                                                                                                 |               |
|         |                                                                            | ANM.....04                                                                                                                                                                  |               |
|         |                                                                            | Other.....88<br>(Specify)                                                                                                                                                   |               |

| Sl. no. | Questions                                               | Response                                                                                                                                                                    | Skip / Remark            |
|---------|---------------------------------------------------------|-----------------------------------------------------------------------------------------------------------------------------------------------------------------------------|--------------------------|
| 12.     | Who suggested you the place for treatment first?        | Self/Family decision .....01                                                                                                                                                |                          |
|         |                                                         | ANM.....02                                                                                                                                                                  |                          |
|         |                                                         | ASHA.....03                                                                                                                                                                 |                          |
|         |                                                         | RMP.....04                                                                                                                                                                  |                          |
|         |                                                         | Other .....88<br>(Specify)                                                                                                                                                  |                          |
| 13.     | Initially, where did you take your child for treatment? | Government Hospital.....01                                                                                                                                                  |                          |
|         |                                                         | CHC.....02                                                                                                                                                                  |                          |
|         |                                                         | PHC.....03                                                                                                                                                                  |                          |
|         |                                                         | Sub-centre /ANM.....04                                                                                                                                                      |                          |
|         |                                                         | Private Hospital/Clinic.....05                                                                                                                                              | Name                     |
|         |                                                         | RMP.....06                                                                                                                                                                  | Name                     |
|         |                                                         | Other .....88<br>(specify )                                                                                                                                                 |                          |
| 14.     | When did the treatment start?                           | <input type="text"/> <input type="text"/> / <input type="text"/> <input type="text"/> / <input type="text"/> <input type="text"/> <input type="text"/> <input type="text"/> | (except home remedies)   |
| 15.     | Is your child under treatment today?                    | Yes .....01                                                                                                                                                                 | <b>Skip to Section D</b> |
|         |                                                         | No.....02                                                                                                                                                                   |                          |
| 16.     | If no, why you stopped treatment?                       | Child died.....01                                                                                                                                                           |                          |
|         |                                                         | No improvement.....02                                                                                                                                                       |                          |
|         |                                                         | Distance to facility was issue.....03                                                                                                                                       |                          |
|         |                                                         | No one to accompany.....04                                                                                                                                                  |                          |
|         |                                                         | Child is fine now.....05                                                                                                                                                    |                          |
|         |                                                         | Treatment was costly.....06                                                                                                                                                 |                          |
|         |                                                         | Other.....88<br>(Specify)                                                                                                                                                   |                          |

Country ID:

State ID:

Form ID:

Sick Newborn Home Visit

5

**B. First contact (Contd.....)**

| Sl. no. | Questions                                                             | Response                                    | Skip / Remark     |
|---------|-----------------------------------------------------------------------|---------------------------------------------|-------------------|
| 17.     | Is the current place of treatment same where treatment started first? | Yes .....01                                 | Skip to Section D |
|         |                                                                       | No.....02                                   |                   |
|         |                                                                       | Not applicable .....66<br>( if infant died) | Skip to section D |
| 18.     | If no, why have you changed the place?                                | Referred by provider.....01                 |                   |
|         |                                                                       | No improvement .....02                      |                   |
|         |                                                                       | Distance was issue .....03                  |                   |
|         |                                                                       | No one to accompany.....04                  |                   |
|         |                                                                       | Treatment was costly.....06                 |                   |
|         |                                                                       | Other.....88<br>(Specify)                   |                   |

**C. Second Contact with Family (Please fill this section during second contact)**

| Sl. no. | Questions                                                  | Response                                                                                                                                                                    | Skips |
|---------|------------------------------------------------------------|-----------------------------------------------------------------------------------------------------------------------------------------------------------------------------|-------|
| 19.     | Second contact Date<br>(dd/mm/yyyy)                        | <input type="text"/> <input type="text"/> / <input type="text"/> <input type="text"/> / <input type="text"/> <input type="text"/> <input type="text"/> <input type="text"/> |       |
| 20.     | Status of the infant on first contact<br>(one answer only) | Infant is available.....01                                                                                                                                                  |       |
|         |                                                            | Infant died .....02                                                                                                                                                         |       |
|         |                                                            | Infant is hospitalized.....03                                                                                                                                               |       |
|         |                                                            | Refused to give information..... 04                                                                                                                                         |       |
|         |                                                            | Other .....88<br>(Specify )                                                                                                                                                 |       |
| 21.     | Adult primary respondent<br>( second contact)              | Father.....01                                                                                                                                                               |       |
|         |                                                            | Mother.....02                                                                                                                                                               |       |
|         |                                                            | Other .....88<br>(Specify )                                                                                                                                                 |       |

(In case of first contact with family, field worker will go to section D directly after filling question no 18)

Country ID:

State ID:

Form ID:

Sick Newborn Home Visit

5

**D. Details of Care Seeking and Follow up by Health Staff at Home** (Add additional sheet in case of treatment more than 8 days)

|     |                                                                 | Day 1                                                                                                                                                                                                                                                                                       | Day 2                                                                                                                                                                                                                                                                                       | Day3                                                                                                                                                                                                                                                                                        | Day 4                                                                                                                                                                                                                                                                                       | Day 5                                                                                                                                                                                                                                                                                       | Day 6                                                                                                                                                                                                                                                                                       | Day 7                                                                                                                                                                                                                                                                                       | Day 8                                                                                                                                                                                                                                                                                       |                                                                                                                                                                                                                                                                                             |
|-----|-----------------------------------------------------------------|---------------------------------------------------------------------------------------------------------------------------------------------------------------------------------------------------------------------------------------------------------------------------------------------|---------------------------------------------------------------------------------------------------------------------------------------------------------------------------------------------------------------------------------------------------------------------------------------------|---------------------------------------------------------------------------------------------------------------------------------------------------------------------------------------------------------------------------------------------------------------------------------------------|---------------------------------------------------------------------------------------------------------------------------------------------------------------------------------------------------------------------------------------------------------------------------------------------|---------------------------------------------------------------------------------------------------------------------------------------------------------------------------------------------------------------------------------------------------------------------------------------------|---------------------------------------------------------------------------------------------------------------------------------------------------------------------------------------------------------------------------------------------------------------------------------------------|---------------------------------------------------------------------------------------------------------------------------------------------------------------------------------------------------------------------------------------------------------------------------------------------|---------------------------------------------------------------------------------------------------------------------------------------------------------------------------------------------------------------------------------------------------------------------------------------------|---------------------------------------------------------------------------------------------------------------------------------------------------------------------------------------------------------------------------------------------------------------------------------------------|
| 22. | Date DD/MM/YY                                                   | <input type="text"/>                                                                                                                                                                                                                                                                        | <input type="text"/>                                                                                                                                                                                                                                                                        | <input type="text"/>                                                                                                                                                                                                                                                                        | <input type="text"/>                                                                                                                                                                                                                                                                        | <input type="text"/>                                                                                                                                                                                                                                                                        | <input type="text"/>                                                                                                                                                                                                                                                                        | <input type="text"/>                                                                                                                                                                                                                                                                        | <input type="text"/>                                                                                                                                                                                                                                                                        |                                                                                                                                                                                                                                                                                             |
| 23. | How your child was treated?<br>(Tick one)                       | Inpatient <input type="checkbox"/><br>Out patient <input type="checkbox"/><br>At Home <input type="checkbox"/>                                                                                                                                                                              | Inpatient <input type="checkbox"/><br>Out patient <input type="checkbox"/><br>At home <input type="checkbox"/>                                                                                                                                                                              | Inpatient <input type="checkbox"/><br>Out patient <input type="checkbox"/><br>At home <input type="checkbox"/>                                                                                                                                                                              | Inpatient <input type="checkbox"/><br>Out patient <input type="checkbox"/><br>At home <input type="checkbox"/>                                                                                                                                                                              | Inpatient <input type="checkbox"/><br>Out patient <input type="checkbox"/><br>At home <input type="checkbox"/>                                                                                                                                                                              | Inpatient <input type="checkbox"/><br>Out patient <input type="checkbox"/><br>At home <input type="checkbox"/>                                                                                                                                                                              | Inpatient <input type="checkbox"/><br>Out patient <input type="checkbox"/><br>At home <input type="checkbox"/>                                                                                                                                                                              | Inpatient <input type="checkbox"/><br>Out patient <input type="checkbox"/><br>At home <input type="checkbox"/>                                                                                                                                                                              |                                                                                                                                                                                                                                                                                             |
| 24. | Who assessed your child health on that day?<br>( Tick)          | Doctor <input type="checkbox"/><br>Nurse <input type="checkbox"/><br>ANM <input type="checkbox"/><br>RMP <input type="checkbox"/><br>Other <input type="checkbox"/>                                                                                                                         | Doctor <input type="checkbox"/><br>Nurse <input type="checkbox"/><br>ANM <input type="checkbox"/><br>RMP <input type="checkbox"/><br>No One <input type="checkbox"/><br>Other <input type="checkbox"/>                                                                                      | Doctor <input type="checkbox"/><br>Nurse <input type="checkbox"/><br>ANM <input type="checkbox"/><br>RMP <input type="checkbox"/><br>No One <input type="checkbox"/><br>Other <input type="checkbox"/>                                                                                      | Doctor <input type="checkbox"/><br>Nurse <input type="checkbox"/><br>ANM <input type="checkbox"/><br>RMP <input type="checkbox"/><br>No One <input type="checkbox"/><br>Other <input type="checkbox"/>                                                                                      | Doctor <input type="checkbox"/><br>Nurse <input type="checkbox"/><br>ANM <input type="checkbox"/><br>RMP <input type="checkbox"/><br>No One <input type="checkbox"/><br>Other <input type="checkbox"/>                                                                                      | Doctor <input type="checkbox"/><br>Nurse <input type="checkbox"/><br>ANM <input type="checkbox"/><br>RMP <input type="checkbox"/><br>No One <input type="checkbox"/><br>Other <input type="checkbox"/>                                                                                      | Doctor <input type="checkbox"/><br>Nurse <input type="checkbox"/><br>ANM <input type="checkbox"/><br>RMP <input type="checkbox"/><br>No One <input type="checkbox"/><br>Other <input type="checkbox"/>                                                                                      | Doctor <input type="checkbox"/><br>Nurse <input type="checkbox"/><br>ANM <input type="checkbox"/><br>RMP <input type="checkbox"/><br>No One <input type="checkbox"/><br>Other <input type="checkbox"/>                                                                                      | Doctor <input type="checkbox"/><br>Nurse <input type="checkbox"/><br>ANM <input type="checkbox"/><br>RMP <input type="checkbox"/><br>No One <input type="checkbox"/><br>Other <input type="checkbox"/>                                                                                      |
|     |                                                                 | If other , Specify                                                                                                                                                                                                                                                                          | If other , Specify                                                                                                                                                                                                                                                                          | If other , Specify                                                                                                                                                                                                                                                                          | If other , Specify                                                                                                                                                                                                                                                                          | If other , Specify                                                                                                                                                                                                                                                                          | If other , Specify                                                                                                                                                                                                                                                                          | If other , Specify                                                                                                                                                                                                                                                                          | If other , Specify                                                                                                                                                                                                                                                                          |                                                                                                                                                                                                                                                                                             |
| 25. | Did your infant given injection?<br>( Tick one)                 | Yes <input type="checkbox"/><br>No <input type="checkbox"/><br>Do not know <input type="checkbox"/>                                                                                                                                                                                         | Yes <input type="checkbox"/><br>No <input type="checkbox"/><br>Do not know <input type="checkbox"/>                                                                                                                                                                                         | Yes <input type="checkbox"/><br>No <input type="checkbox"/><br>Do not know <input type="checkbox"/>                                                                                                                                                                                         | Yes <input type="checkbox"/><br>No <input type="checkbox"/><br>Do not know <input type="checkbox"/>                                                                                                                                                                                         | Yes <input type="checkbox"/><br>No <input type="checkbox"/><br>Do not know <input type="checkbox"/>                                                                                                                                                                                         | Yes <input type="checkbox"/><br>No <input type="checkbox"/><br>Do not know <input type="checkbox"/>                                                                                                                                                                                         | Yes <input type="checkbox"/><br>No <input type="checkbox"/><br>Do not know <input type="checkbox"/>                                                                                                                                                                                         | Yes <input type="checkbox"/><br>No <input type="checkbox"/><br>Do not know <input type="checkbox"/>                                                                                                                                                                                         |                                                                                                                                                                                                                                                                                             |
| 26. | Where did child receive treatment?<br>(INJECTION)<br>(Tick one) | DH <input type="checkbox"/><br>CHC <input type="checkbox"/><br>PHC <input type="checkbox"/><br>Sub Centre <input type="checkbox"/><br>Pvt Hospital <input type="checkbox"/><br>RMP Clinic <input type="checkbox"/><br>Don't Know <input type="checkbox"/><br>Other <input type="checkbox"/> | DH <input type="checkbox"/><br>CHC <input type="checkbox"/><br>PHC <input type="checkbox"/><br>Sub Centre <input type="checkbox"/><br>Pvt Hospital <input type="checkbox"/><br>RMP Clinic <input type="checkbox"/><br>Don't Know <input type="checkbox"/><br>Other <input type="checkbox"/> | DH <input type="checkbox"/><br>CHC <input type="checkbox"/><br>PHC <input type="checkbox"/><br>Sub Centre <input type="checkbox"/><br>Pvt Hospital <input type="checkbox"/><br>RMP Clinic <input type="checkbox"/><br>Don't Know <input type="checkbox"/><br>Other <input type="checkbox"/> | DH <input type="checkbox"/><br>CHC <input type="checkbox"/><br>PHC <input type="checkbox"/><br>Sub Centre <input type="checkbox"/><br>Pvt Hospital <input type="checkbox"/><br>RMP Clinic <input type="checkbox"/><br>Don't Know <input type="checkbox"/><br>Other <input type="checkbox"/> | DH <input type="checkbox"/><br>CHC <input type="checkbox"/><br>PHC <input type="checkbox"/><br>Sub Centre <input type="checkbox"/><br>Pvt Hospital <input type="checkbox"/><br>RMP Clinic <input type="checkbox"/><br>Don't Know <input type="checkbox"/><br>Other <input type="checkbox"/> | DH <input type="checkbox"/><br>CHC <input type="checkbox"/><br>PHC <input type="checkbox"/><br>Sub Centre <input type="checkbox"/><br>Pvt Hospital <input type="checkbox"/><br>RMP Clinic <input type="checkbox"/><br>Don't Know <input type="checkbox"/><br>Other <input type="checkbox"/> | DH <input type="checkbox"/><br>CHC <input type="checkbox"/><br>PHC <input type="checkbox"/><br>Sub Centre <input type="checkbox"/><br>Pvt Hospital <input type="checkbox"/><br>RMP Clinic <input type="checkbox"/><br>Don't Know <input type="checkbox"/><br>Other <input type="checkbox"/> | DH <input type="checkbox"/><br>CHC <input type="checkbox"/><br>PHC <input type="checkbox"/><br>Sub Centre <input type="checkbox"/><br>Pvt Hospital <input type="checkbox"/><br>RMP Clinic <input type="checkbox"/><br>Don't Know <input type="checkbox"/><br>Other <input type="checkbox"/> | DH <input type="checkbox"/><br>CHC <input type="checkbox"/><br>PHC <input type="checkbox"/><br>Sub Centre <input type="checkbox"/><br>Pvt Hospital <input type="checkbox"/><br>RMP Clinic <input type="checkbox"/><br>Don't Know <input type="checkbox"/><br>Other <input type="checkbox"/> |
|     |                                                                 | If other , Specify                                                                                                                                                                                                                                                                          | If other , Specify                                                                                                                                                                                                                                                                          | If other , Specify                                                                                                                                                                                                                                                                          | If other , Specify                                                                                                                                                                                                                                                                          | If other , Specify                                                                                                                                                                                                                                                                          | If other , Specify                                                                                                                                                                                                                                                                          | If other , Specify                                                                                                                                                                                                                                                                          | If other , Specify                                                                                                                                                                                                                                                                          |                                                                                                                                                                                                                                                                                             |

Country ID:

State ID:

Form ID:

Sick Newborn Home Visit

|     |                                                                                                | Day 1                                                                                                                                                                            | Day 2                                                                                                                                                                                                         | Day3                                                                                                                                                                                                          | Day 4                                                                                                                                                                                                         | Day 5                                                                                                                                                                                                         | Day 6                                                                                                                                                                                                         | Day 7                                                                                                                                                                                                         | Day 8                                                                                                                                                                                                         |                                                                                                                                                                                  |
|-----|------------------------------------------------------------------------------------------------|----------------------------------------------------------------------------------------------------------------------------------------------------------------------------------|---------------------------------------------------------------------------------------------------------------------------------------------------------------------------------------------------------------|---------------------------------------------------------------------------------------------------------------------------------------------------------------------------------------------------------------|---------------------------------------------------------------------------------------------------------------------------------------------------------------------------------------------------------------|---------------------------------------------------------------------------------------------------------------------------------------------------------------------------------------------------------------|---------------------------------------------------------------------------------------------------------------------------------------------------------------------------------------------------------------|---------------------------------------------------------------------------------------------------------------------------------------------------------------------------------------------------------------|---------------------------------------------------------------------------------------------------------------------------------------------------------------------------------------------------------------|----------------------------------------------------------------------------------------------------------------------------------------------------------------------------------|
| 27. | Who administered the injection?<br><br>(Tick one)                                              | Doctor <input type="checkbox"/><br>Nurse / ANM <input type="checkbox"/><br>RMP <input type="checkbox"/><br>Don't Know <input type="checkbox"/><br>Other <input type="checkbox"/> | Doctor <input type="checkbox"/><br>Nurse / ANM <input type="checkbox"/><br>RMP <input type="checkbox"/><br>Don't know <input type="checkbox"/><br>Other <input type="checkbox"/>                              | Doctor <input type="checkbox"/><br>Nurse / ANM <input type="checkbox"/><br>RMP <input type="checkbox"/><br>Don't know <input type="checkbox"/><br>Other <input type="checkbox"/>                              | Doctor <input type="checkbox"/><br>Nurse / ANM <input type="checkbox"/><br>RMP <input type="checkbox"/><br>Don't know <input type="checkbox"/><br>Other <input type="checkbox"/>                              | Doctor <input type="checkbox"/><br>Nurse / ANM <input type="checkbox"/><br>RMP <input type="checkbox"/><br>Don't know <input type="checkbox"/><br>Other <input type="checkbox"/>                              | Doctor <input type="checkbox"/><br>Nurse / ANM <input type="checkbox"/><br>RMP <input type="checkbox"/><br>Don't know <input type="checkbox"/><br>Other <input type="checkbox"/>                              | Doctor <input type="checkbox"/><br>Nurse / ANM <input type="checkbox"/><br>RMP <input type="checkbox"/><br>Don't Know <input type="checkbox"/><br>Other <input type="checkbox"/>                              | Doctor <input type="checkbox"/><br>Nurse / ANM <input type="checkbox"/><br>RMP <input type="checkbox"/><br>Don't Know <input type="checkbox"/><br>Other <input type="checkbox"/>                              | Doctor <input type="checkbox"/><br>Nurse / ANM <input type="checkbox"/><br>RMP <input type="checkbox"/><br>Don't know <input type="checkbox"/><br>Other <input type="checkbox"/> |
|     |                                                                                                | If other , Specify                                                                                                                                                               | If other , Specify                                                                                                                                                                                            | If other , Specify                                                                                                                                                                                            | If other , Specify                                                                                                                                                                                            | If other , Specify                                                                                                                                                                                            | If other , Specify                                                                                                                                                                                            | If other , Specify                                                                                                                                                                                            | If other , Specify                                                                                                                                                                                            |                                                                                                                                                                                  |
| 28. | Was your child given any syrup<br><br>(Tick one)                                               | Yes <input type="checkbox"/><br>No <input type="checkbox"/><br>Do not know <input type="checkbox"/>                                                                              | Yes <input type="checkbox"/><br>No <input type="checkbox"/><br>Do not know <input type="checkbox"/>                                                                                                           | Yes <input type="checkbox"/><br>No <input type="checkbox"/><br>Do not know <input type="checkbox"/>                                                                                                           | Yes <input type="checkbox"/><br>No <input type="checkbox"/><br>Do not know <input type="checkbox"/>                                                                                                           | Yes <input type="checkbox"/><br>No <input type="checkbox"/><br>Do not know <input type="checkbox"/>                                                                                                           | Yes <input type="checkbox"/><br>No <input type="checkbox"/><br>Do not know <input type="checkbox"/>                                                                                                           | Yes <input type="checkbox"/><br>No <input type="checkbox"/><br>Do not know <input type="checkbox"/>                                                                                                           | Yes <input type="checkbox"/><br>No <input type="checkbox"/><br>Do not know <input type="checkbox"/>                                                                                                           |                                                                                                                                                                                  |
| 29. | Where was your child given syrup?<br><br>(Tick)                                                | At Facility <input type="checkbox"/><br>At home <input type="checkbox"/>                                                                                                         | At Facility <input type="checkbox"/><br>At home <input type="checkbox"/>                                                                                                                                      | At Facility <input type="checkbox"/><br>At home <input type="checkbox"/>                                                                                                                                      | At Facility <input type="checkbox"/><br>At home <input type="checkbox"/>                                                                                                                                      | At Facility <input type="checkbox"/><br>At home <input type="checkbox"/>                                                                                                                                      | At Facility <input type="checkbox"/><br>At home <input type="checkbox"/>                                                                                                                                      | At Facility <input type="checkbox"/><br>At home <input type="checkbox"/>                                                                                                                                      | At Facility <input type="checkbox"/><br>At home <input type="checkbox"/>                                                                                                                                      |                                                                                                                                                                                  |
| 30. | Did any health worker visit home to observe condition of child<br><br>(Tick)                   | ANM <input type="checkbox"/><br>ASHA <input type="checkbox"/><br>No one <input type="checkbox"/><br>Other <input type="checkbox"/>                                               | ANM <input type="checkbox"/><br>ASHA <input type="checkbox"/><br>No one <input type="checkbox"/><br>Other <input type="checkbox"/>                                                                            | ANM <input type="checkbox"/><br>ASHA <input type="checkbox"/><br>No one <input type="checkbox"/><br>Other <input type="checkbox"/>                                                                            | ANM <input type="checkbox"/><br>ASHA <input type="checkbox"/><br>No one <input type="checkbox"/><br>Other <input type="checkbox"/>                                                                            | ANM <input type="checkbox"/><br>ASHA <input type="checkbox"/><br>No one <input type="checkbox"/><br>Other <input type="checkbox"/>                                                                            | ANM <input type="checkbox"/><br>ASHA <input type="checkbox"/><br>No one <input type="checkbox"/><br>Other <input type="checkbox"/>                                                                            | ANM <input type="checkbox"/><br>ASHA <input type="checkbox"/><br>No one <input type="checkbox"/><br>Other <input type="checkbox"/>                                                                            | ANM <input type="checkbox"/><br>ASHA <input type="checkbox"/><br>No one <input type="checkbox"/><br>Other <input type="checkbox"/>                                                                            |                                                                                                                                                                                  |
|     |                                                                                                | If other , Specify                                                                                                                                                               | If other , Specify                                                                                                                                                                                            | If other , Specify                                                                                                                                                                                            | If other , Specify                                                                                                                                                                                            | If other , Specify                                                                                                                                                                                            | If other , Specify                                                                                                                                                                                            | If other , Specify                                                                                                                                                                                            | If other , Specify                                                                                                                                                                                            |                                                                                                                                                                                  |
| 31. | What was the condition of your child compared to last day?<br>( Perception )<br><br>(Tick one) |                                                                                                                                                                                  | Same <input type="checkbox"/><br>Better <input type="checkbox"/><br>Worsen <input type="checkbox"/><br>Cured <input type="checkbox"/><br>Died <input type="checkbox"/><br>Don't Know <input type="checkbox"/> | Same <input type="checkbox"/><br>Better <input type="checkbox"/><br>Worsen <input type="checkbox"/><br>Cured <input type="checkbox"/><br>Died <input type="checkbox"/><br>Don't Know <input type="checkbox"/> | Same <input type="checkbox"/><br>Better <input type="checkbox"/><br>Worsen <input type="checkbox"/><br>Cured <input type="checkbox"/><br>Died <input type="checkbox"/><br>Don't Know <input type="checkbox"/> | Same <input type="checkbox"/><br>Better <input type="checkbox"/><br>Worsen <input type="checkbox"/><br>Cured <input type="checkbox"/><br>Died <input type="checkbox"/><br>Don't Know <input type="checkbox"/> | Same <input type="checkbox"/><br>Better <input type="checkbox"/><br>Worsen <input type="checkbox"/><br>Cured <input type="checkbox"/><br>Died <input type="checkbox"/><br>Don't Know <input type="checkbox"/> | Same <input type="checkbox"/><br>Better <input type="checkbox"/><br>Worsen <input type="checkbox"/><br>Cured <input type="checkbox"/><br>Died <input type="checkbox"/><br>Don't Know <input type="checkbox"/> | Same <input type="checkbox"/><br>Better <input type="checkbox"/><br>Worsen <input type="checkbox"/><br>Cured <input type="checkbox"/><br>Died <input type="checkbox"/><br>Don't Know <input type="checkbox"/> |                                                                                                                                                                                  |

Country ID:

State ID:

Form ID:

E. Serious Adverse Event ( As reported by mother/caregiver)

|     |                                                                                                | Day 1                                                                                                                                                                                                                                     | Day 2                                                                                                                                                                                                                                     | Day3                                                                                                                                                                                                                                      | Day 4                                                                                                                                                                                                                                     | Day 5                                                                                                                                                                                                                                     | Day 6                                                                                                                                                                                                                                     | Day 7                                                                                                                                                                                                                                     | Day 8                                                                                                                                                                                                                                     |
|-----|------------------------------------------------------------------------------------------------|-------------------------------------------------------------------------------------------------------------------------------------------------------------------------------------------------------------------------------------------|-------------------------------------------------------------------------------------------------------------------------------------------------------------------------------------------------------------------------------------------|-------------------------------------------------------------------------------------------------------------------------------------------------------------------------------------------------------------------------------------------|-------------------------------------------------------------------------------------------------------------------------------------------------------------------------------------------------------------------------------------------|-------------------------------------------------------------------------------------------------------------------------------------------------------------------------------------------------------------------------------------------|-------------------------------------------------------------------------------------------------------------------------------------------------------------------------------------------------------------------------------------------|-------------------------------------------------------------------------------------------------------------------------------------------------------------------------------------------------------------------------------------------|-------------------------------------------------------------------------------------------------------------------------------------------------------------------------------------------------------------------------------------------|
| 32. | Did the infant has diarrhoea? (passed ≥3 stools which is looser than normal or watery stools ) | Yes <input type="checkbox"/><br>NO <input type="checkbox"/>                                                                                                                                                                               | Yes <input type="checkbox"/><br>NO <input type="checkbox"/>                                                                                                                                                                               | Yes <input type="checkbox"/><br>NO <input type="checkbox"/>                                                                                                                                                                               | Yes <input type="checkbox"/><br>NO <input type="checkbox"/>                                                                                                                                                                               | Yes <input type="checkbox"/><br>NO <input type="checkbox"/>                                                                                                                                                                               | Yes <input type="checkbox"/><br>NO <input type="checkbox"/>                                                                                                                                                                               | Yes <input type="checkbox"/><br>NO <input type="checkbox"/>                                                                                                                                                                               | Yes <input type="checkbox"/><br>NO <input type="checkbox"/>                                                                                                                                                                               |
| 33. | Did the infant has any skin rash (SKIN RASH)                                                   | Yes <input type="checkbox"/><br>NO <input type="checkbox"/>                                                                                                                                                                               | Yes <input type="checkbox"/><br>NO <input type="checkbox"/>                                                                                                                                                                               | Yes <input type="checkbox"/><br>NO <input type="checkbox"/>                                                                                                                                                                               | Yes <input type="checkbox"/><br>NO <input type="checkbox"/>                                                                                                                                                                               | Yes <input type="checkbox"/><br>NO <input type="checkbox"/>                                                                                                                                                                               | Yes <input type="checkbox"/><br>NO <input type="checkbox"/>                                                                                                                                                                               | Yes <input type="checkbox"/><br>NO <input type="checkbox"/>                                                                                                                                                                               | Yes <input type="checkbox"/><br>NO <input type="checkbox"/>                                                                                                                                                                               |
| 34. | Did the infant not pass urine for 24 hours?                                                    | Yes <input type="checkbox"/><br>NO <input type="checkbox"/>                                                                                                                                                                               | Yes <input type="checkbox"/><br>NO <input type="checkbox"/>                                                                                                                                                                               | Yes <input type="checkbox"/><br>NO <input type="checkbox"/>                                                                                                                                                                               | Yes <input type="checkbox"/><br>NO <input type="checkbox"/>                                                                                                                                                                               | Yes <input type="checkbox"/><br>NO <input type="checkbox"/>                                                                                                                                                                               | Yes <input type="checkbox"/><br>NO <input type="checkbox"/>                                                                                                                                                                               | Yes <input type="checkbox"/><br>NO <input type="checkbox"/>                                                                                                                                                                               | Yes <input type="checkbox"/><br>NO <input type="checkbox"/>                                                                                                                                                                               |
| 35. | Did the infant pass urine lesser than normal? ( Freq./ quantity)                               | Yes <input type="checkbox"/><br>NO <input type="checkbox"/><br>Not sure <input type="checkbox"/>                                                                                                                                          | Yes <input type="checkbox"/><br>NO <input type="checkbox"/><br>Not sure <input type="checkbox"/>                                                                                                                                          | Yes <input type="checkbox"/><br>NO <input type="checkbox"/><br>Not sure <input type="checkbox"/>                                                                                                                                          | Yes <input type="checkbox"/><br>NO <input type="checkbox"/><br>Not sure <input type="checkbox"/>                                                                                                                                          | Yes <input type="checkbox"/><br>NO <input type="checkbox"/><br>Not sure <input type="checkbox"/>                                                                                                                                          | Yes <input type="checkbox"/><br>NO <input type="checkbox"/><br>Not sure <input type="checkbox"/>                                                                                                                                          | Yes <input type="checkbox"/><br>NO <input type="checkbox"/><br>Not sure <input type="checkbox"/>                                                                                                                                          | Yes <input type="checkbox"/><br>NO <input type="checkbox"/><br>Not sure <input type="checkbox"/>                                                                                                                                          |
| 36. | Did the infant has swellings with redness /puss at injection site?                             | Yes <input type="checkbox"/><br>NO <input type="checkbox"/>                                                                                                                                                                               | Yes <input type="checkbox"/><br>NO <input type="checkbox"/>                                                                                                                                                                               | Yes <input type="checkbox"/><br>NO <input type="checkbox"/>                                                                                                                                                                               | Yes <input type="checkbox"/><br>NO <input type="checkbox"/>                                                                                                                                                                               | Yes <input type="checkbox"/><br>NO <input type="checkbox"/>                                                                                                                                                                               | Yes <input type="checkbox"/><br>NO <input type="checkbox"/>                                                                                                                                                                               | Yes <input type="checkbox"/><br>NO <input type="checkbox"/>                                                                                                                                                                               | Yes <input type="checkbox"/><br>NO <input type="checkbox"/>                                                                                                                                                                               |
| 37. | In your knowledge, was any change introduced in treatment by the treatment provider?           | Stopped Med <input type="checkbox"/><br>Changed Med <input type="checkbox"/><br>Reduced dose <input type="checkbox"/><br>Change Freq. <input type="checkbox"/><br>No change <input type="checkbox"/><br>Not Sure <input type="checkbox"/> | Stopped Med <input type="checkbox"/><br>Changed Med <input type="checkbox"/><br>Reduced dose <input type="checkbox"/><br>Change Freq. <input type="checkbox"/><br>No change <input type="checkbox"/><br>Not Sure <input type="checkbox"/> | Stopped Med <input type="checkbox"/><br>Changed Med <input type="checkbox"/><br>Reduced dose <input type="checkbox"/><br>Change Freq. <input type="checkbox"/><br>No change <input type="checkbox"/><br>Not Sure <input type="checkbox"/> | Stopped Med <input type="checkbox"/><br>Changed Med <input type="checkbox"/><br>Reduced dose <input type="checkbox"/><br>Change Freq. <input type="checkbox"/><br>No change <input type="checkbox"/><br>Not Sure <input type="checkbox"/> | Stopped Med <input type="checkbox"/><br>Changed Med <input type="checkbox"/><br>Reduced dose <input type="checkbox"/><br>Change Freq. <input type="checkbox"/><br>No change <input type="checkbox"/><br>Not Sure <input type="checkbox"/> | Stopped Med <input type="checkbox"/><br>Changed Med <input type="checkbox"/><br>Reduced dose <input type="checkbox"/><br>Change Freq. <input type="checkbox"/><br>No change <input type="checkbox"/><br>Not Sure <input type="checkbox"/> | Stopped Med <input type="checkbox"/><br>Changed Med <input type="checkbox"/><br>Reduced dose <input type="checkbox"/><br>Change Freq. <input type="checkbox"/><br>No change <input type="checkbox"/><br>Not Sure <input type="checkbox"/> | Stopped Med <input type="checkbox"/><br>Changed Med <input type="checkbox"/><br>Reduced dose <input type="checkbox"/><br>Change Freq. <input type="checkbox"/><br>No change <input type="checkbox"/><br>Not Sure <input type="checkbox"/> |

Country ID:

State ID:

Form ID:

F. Illness Narrative

|     |                                                                                                                                                                  |
|-----|------------------------------------------------------------------------------------------------------------------------------------------------------------------|
| 38. | Give a brief narrative account of the onset of illness, care seeking, issues faced, treatment received ( Please put dates and experience as described by mother) |
|     |                                                                                                                                                                  |

|     |                   |                                                                  |                   |                                                                                                                                                                             |
|-----|-------------------|------------------------------------------------------------------|-------------------|-----------------------------------------------------------------------------------------------------------------------------------------------------------------------------|
| 39. | Form completed by | <input type="text"/> <input type="text"/> (Initial of name only) | Date (dd/mm/yyyy) | <input type="text"/> <input type="text"/> / <input type="text"/> <input type="text"/> / <input type="text"/> <input type="text"/> <input type="text"/> <input type="text"/> |
| 40. | Form checked by   | <input type="text"/> <input type="text"/> (Initial of name only) | Date (dd/mm/yyyy) | <input type="text"/> <input type="text"/> / <input type="text"/> <input type="text"/> / <input type="text"/> <input type="text"/> <input type="text"/> <input type="text"/> |
| 41. | Form entered by   | <input type="text"/> <input type="text"/> (Initial of name only) | Date (dd/mm/yyyy) | <input type="text"/> <input type="text"/> / <input type="text"/> <input type="text"/> / <input type="text"/> <input type="text"/> <input type="text"/> <input type="text"/> |
| 42. | Form entered by   | <input type="text"/> <input type="text"/> (Initial of name only) | Date (dd/mm/yyyy) | <input type="text"/> <input type="text"/> / <input type="text"/> <input type="text"/> / <input type="text"/> <input type="text"/> <input type="text"/> <input type="text"/> |
