# Supplementary material for: Management of possible serious bacterial infection in young infants closer to home when referral is not feasible: Lessons from implementation research in Himachal Pradesh, India
Source: PubMed Central journal article supplement (PMC7755274; doi:10.1371/journal.pone.0243724), 2020-12-22
Supplement: pone.0243724.s007.pdf [file pone.0243724.s007.pdf]

## Health Facility Survey: Sub Centre

### 1. Identification

|                                              |      |        |       |
|----------------------------------------------|------|--------|-------|
| State                                        |      |        |       |
| District                                     |      |        |       |
| Block                                        |      |        |       |
| Name of Sub center                           |      |        |       |
| Date of Assessment                           | Day: | Month: | Year: |
| Name and signature of person collecting data |      |        |       |

### 2. Services

| S.No.        |                                                                                                                                         |                                                                        |
|--------------|-----------------------------------------------------------------------------------------------------------------------------------------|------------------------------------------------------------------------|
| <b>2.1</b>   | <b>Population covered (in numbers)</b>                                                                                                  |                                                                        |
| <b>2.2</b>   | <b>MCH Care including Family Planning</b>                                                                                               |                                                                        |
| <b>2.2.1</b> | <b>Service availability</b>                                                                                                             | <b>(Yes<sub>1</sub> / No<sub>2</sub>)</b>                              |
| A            | Ante-natal care                                                                                                                         | [ ]                                                                    |
| B            | Intranatal care                                                                                                                         | [ ]                                                                    |
| C            | Post-natal care                                                                                                                         | [ ]                                                                    |
| D            | New born Care                                                                                                                           | [ ]                                                                    |
| E            | Child care including immunization                                                                                                       | [ ]                                                                    |
| F            | Family Planning and contraception                                                                                                       | [ ]                                                                    |
| G            | Adolescent health care                                                                                                                  | [ ]                                                                    |
| H            | Assistance to school health services                                                                                                    | [ ]                                                                    |
| I            | Facilities under Janani Suraksha Yojana                                                                                                 | [ ]                                                                    |
| J            | Treatment of minor ailments                                                                                                             | [ ]                                                                    |
| K            | First aid (specify)                                                                                                                     | [ ]                                                                    |
| <b>2.2.2</b> | <b>Availability of specific services</b>                                                                                                | <b>(Yes<sub>1</sub> / No<sub>2</sub> / Not Applicable<sub>9</sub>)</b> |
| A            | Does the doctor visit the Sub center at least once in a month?                                                                          | [ ]                                                                    |
| B            | Is the day and time of this visit fixed?                                                                                                | [ ]                                                                    |
| C            | Are the residents of the village aware of the timings of the doctor's visit?                                                            | [ ]                                                                    |
| D            | Does the Health Assistant (male) or LHV visit the Sub Centre at least once a week?                                                      | [ ]                                                                    |
| E            | Is the Antenatal care (Inj. T.T, IFA tablets, weight and BP checkup) provided by those in the Sub center?                               | [ ]                                                                    |
| F            | Is the facility for referral of complicated cases of pregnancy / delivery available at Sub center for 24 hours?                         | [ ]                                                                    |
| G            | Does the ANM/any trained personnel accompany the woman in labor to the referred care facility at the time of referral?                  | [ ]                                                                    |
| H            | Are the Immunization services as per Government schedule provided by the Sub center                                                     | [ ]                                                                    |
| I            | Is the ORS for prevention of diarrhea and dehydration available in the Subcenter?                                                       | [ ]                                                                    |
| J            | Is the treatment of minor illness like fever, cough, cold, worm disinfestation etc. available in the Sub center                         | [ ]                                                                    |
| K            | Are the contraceptive services like insertion of Copper-T, distributing Oral contraceptive pills or condoms provided by the Sub center? | [ ]                                                                    |
| <b>2.3</b>   | <b>Monitoring and Supervision activities</b>                                                                                            | <b>(Yes<sub>1</sub> / No<sub>2</sub>)</b>                              |
| A            | Training of traditional birth attendants and ASHA                                                                                       | [ ]                                                                    |

|   |                                                                                     |     |
|---|-------------------------------------------------------------------------------------|-----|
| B | Monitoring of Water quality in the village                                          | [ ] |
| C | Coordination and supervision of activities of ASHA                                  | [ ] |
| D | Proper maintenance of records and registers                                         | [ ] |
| E | Watch over unusual health events                                                    | [ ] |
| F | Coordinated services with AWWs, ASHA, Village Health and Sanitation Committee, PRIs | [ ] |

### 3. Manpower

| S.No. | Personnel                                                                                                                             | Existing     | Recommended                                                | Current Availability at Sub Centre (Indicate Numbers) | Remarks / Suggestions / Identified Gaps |
|-------|---------------------------------------------------------------------------------------------------------------------------------------|--------------|------------------------------------------------------------|-------------------------------------------------------|-----------------------------------------|
| 3.1.  | Health Worker (Female)                                                                                                                | 1            | 1 or 2 (Optional)                                          |                                                       |                                         |
| 3.2.  | Health Worker (Male)                                                                                                                  | 1            | 1 or 0 (optional; may be replaced by female health worker) |                                                       |                                         |
| 3.3.  | Voluntary worker to keep the Sub Centre clean and assisting ANM. She is paid by the ANM from her contingency fund @ Rs. 100 per month | 1 (optional) | 1 (optional)                                               |                                                       |                                         |

### 4. Physical Infrastructure

| S.No.      |                                                                                       | Availability at Subcenter | Remarks |
|------------|---------------------------------------------------------------------------------------|---------------------------|---------|
| <b>4.1</b> | <b>Location</b>                                                                       |                           |         |
| A          | Where is the subcenter located?                                                       |                           |         |
| (i)        | Within Village Locality                                                               |                           |         |
| (ii)       | Far from village locality                                                             |                           |         |
| B          | Is the subcenter easily accessible? (Yes <sub>1</sub> /No <sub>2</sub> )              |                           |         |
| C          | The distance of Sub Centre (in Km) from the nearest village in the coverage area      |                           |         |
| D          | Travel time to reach the Sub Centre from the nearest place in the coverage area       |                           |         |
| E          | The distance of Sub Centre (in Km) from the furthest village in the coverage area     |                           |         |
| F          | Travel time to reach the Sub Centre from the furthest place in the coverage area      |                           |         |
| G          | The distance of Sub Centre (in Km) from the PHC                                       |                           |         |
| H          | The distance of Sub Centre (in Km) from the CHC                                       |                           |         |
| <b>4.2</b> | <b>Building</b>                                                                       |                           |         |
| A          | Is a designated government building available for the Sub Centre? (Yes <sub>1</sub> / |                           |         |

|      |                                                                                                                                                     |  |  |
|------|-----------------------------------------------------------------------------------------------------------------------------------------------------|--|--|
|      | No <sub>2</sub> )                                                                                                                                   |  |  |
| B    | Area of the building (Total area in Sq. meters.)                                                                                                    |  |  |
| C    | What is the present stage of construction of the building                                                                                           |  |  |
| (i)  | Construction complete                                                                                                                               |  |  |
| (ii) | Construction incomplete                                                                                                                             |  |  |
| D    | Compound Wall / Fencing<br>1.All around<br>2.Partial<br>3.None                                                                                      |  |  |
| E    | Condition of floor<br>1. Floor in good condition<br>2. Floor coming off in some places<br>3. Floor coming off in many places or no proper flooring) |  |  |
| F    | Cleanliness<br>Good / Fair / Poor? (Observe)                                                                                                        |  |  |
| G    | Separate public utilities for males and females (Yes <sub>1</sub> /No <sub>2</sub> )                                                                |  |  |
| H    | Clinic Room                                                                                                                                         |  |  |
| I    | Examination room                                                                                                                                    |  |  |
| J    | Water supply                                                                                                                                        |  |  |
| (i)  | Source of water<br>1. Piped<br>2. Bore well/ hand pump / tube well<br>3. Well<br>4.Other (specify))                                                 |  |  |
| (ii) | Whether overhead tank and pump exist (Yes <sub>1</sub> / No <sub>2</sub> )                                                                          |  |  |
| K    | Regular electric supply available? (Yes <sub>1</sub> / No <sub>2</sub> )                                                                            |  |  |
| L    | Transport facility for movement of staff (Yes <sub>1</sub> / No <sub>2</sub> )                                                                      |  |  |
| M    | Residential facility for the staff                                                                                                                  |  |  |

## 5. Equipment

| S.No. | Equipment                           | Available at Sub center (Yes/No) | Remarks |
|-------|-------------------------------------|----------------------------------|---------|
| 1     | Weighing scale                      |                                  |         |
| 2     | Radiant warmer                      |                                  |         |
| 3     | Head circumference measurement tape |                                  |         |
| 4     | Respiratory rate timer              |                                  |         |
| 5     | Thermometer                         |                                  |         |
| 6     | Gloves (various sizes)              |                                  |         |
| 7     | Disposable bags and masks           |                                  |         |

## 6. Drugs

| S.No. | Drug                      | Available | Remarks |
|-------|---------------------------|-----------|---------|
| 1     | Paracetamol Tablets/Syrup |           |         |
| 2     | Iron Folic Acid tab       |           |         |
| 3     | Gentian violet            |           |         |

|    |                                 |  |  |
|----|---------------------------------|--|--|
| 4  | Oral rehydration solution       |  |  |
| 5  | Ampicillin tab                  |  |  |
| 6  | Zinc Sulphate Dispersible tab   |  |  |
| 7  | Gentamycin injection            |  |  |
| 8  | Amoxicillin tab                 |  |  |
| 9  | Sodium chloride (normal saline) |  |  |
| 10 | Vitamin A Suspension            |  |  |
| 11 | B-complex Tablet                |  |  |

**7. Records/Registers**

| S.No. | Name | Complete/Incomplete | Remarks |
|-------|------|---------------------|---------|
| 1.    |      |                     |         |
| 2.    |      |                     |         |
| 3.    |      |                     |         |
| 4.    |      |                     |         |
| 5.    |      |                     |         |

**8. Additional remarks:**
