# Supplementary material for: Management of possible serious bacterial infection in young infants closer to home when referral is not feasible: Lessons from implementation research in Himachal Pradesh, India
Source: PubMed Central journal article supplement (PMC7755274; doi:10.1371/journal.pone.0243724), 2020-12-22
Supplement: pone.0243724.s008.pdf [file pone.0243724.s008.pdf]

## Health Facility Survey: Primary Health Centre

### 1. Identification

|                                               |      |        |       |
|-----------------------------------------------|------|--------|-------|
| State:                                        |      |        |       |
| District:                                     |      |        |       |
| Block:                                        |      |        |       |
| Name of PHC:                                  |      |        |       |
| Date of Assessment:                           | Day: | Month: | Year: |
| Name and signature of person collecting data: |      |        |       |

### 2. Services

| S.No.      |                                                                                                        |                |                            |
|------------|--------------------------------------------------------------------------------------------------------|----------------|----------------------------|
| <b>2.1</b> | <b>Population covered (In numbers)</b>                                                                 |                |                            |
| <b>2.2</b> | <b>Assured services available (Yes<sub>1</sub>/No<sub>2</sub>)</b>                                     | <b>General</b> | <b>Infant &lt;2 months</b> |
| A          | OPD services                                                                                           | [ ]            | [ ]                        |
| B          | Number of beds available                                                                               | [ ]            | [ ]                        |
| C          | In-patient services                                                                                    | [ ]            | [ ]                        |
| D          | Emergency services (24hours)                                                                           | [ ]            | [ ]                        |
| <b>2.3</b> | <b>OPD Attendance during last one month</b>                                                            |                |                            |
| 2.3.1      | Male (Total)                                                                                           | [ ]            |                            |
| 2.3.2      | Female (Total)                                                                                         | [ ]            |                            |
| 2.3.3      | Infants                                                                                                | [ ]            |                            |
| A          | Age <2 months                                                                                          | [ ]            |                            |
| B          | Age 2 months - 1year                                                                                   | [ ]            |                            |
| <b>2.4</b> | <b>MCH Care including Family Planning</b>                                                              |                |                            |
| 2.4.1      | Service availability (Yes <sub>1</sub> / No <sub>2</sub> )                                             |                |                            |
| A          | Antenatal care                                                                                         | [ ]            |                            |
| B          | Intranatal care (24 - hour delivery services both normal and assisted)                                 | [ ]            |                            |
| C          | Post-natal care                                                                                        | [ ]            |                            |
| D          | New born Care                                                                                          | [ ]            |                            |
| E          | Child care including immunization                                                                      | [ ]            |                            |
| F          | Family Planning                                                                                        | [ ]            |                            |
| G          | MTP                                                                                                    | [ ]            |                            |
| H          | Management of RTI / STI                                                                                | [ ]            |                            |
| 2.4.2      | <b>Availability of specific services</b>                                                               |                |                            |
| A          | Are antenatal clinics organized by the PHC regularly?<br>(Yes <sub>1</sub> / No <sub>2</sub> )         | [ ]            |                            |
| B          | Are the low birth weight babies managed at the PHC?<br>(Yes <sub>1</sub> / No <sub>2</sub> )           | [ ]            |                            |
| C          | Is there a fixed immunization day?(Yes <sub>1</sub> / No <sub>2</sub> )                                | [ ]            |                            |
| D          | How is the vaccine received at PHC and distributed to Sub Centers?                                     |                |                            |
| E          | Is the treatment of children with pneumonia available at the PHC?(Yes <sub>1</sub> / No <sub>2</sub> ) | [ ]            |                            |

|            |                                                                                                                                          |     |
|------------|------------------------------------------------------------------------------------------------------------------------------------------|-----|
| F          | Is the management of children suffering from diarrhoea with severe dehydration done at the PHC?<br>(Yes <sub>1</sub> / No <sub>2</sub> ) | [ ] |
| G          | Is telemedicine facility available?(Yes <sub>1</sub> / No <sub>2</sub> )                                                                 | [ ] |
| (i)        | Timing of the service                                                                                                                    | [ ] |
| (ii)       | Frequency of use in last three months                                                                                                    | [ ] |
| H          | Is there a service for identification of sick infant with PSBI?<br>(Yes <sub>1</sub> / No <sub>2</sub> )                                 | [ ] |
| I          | Is simplified regime available and provided to patients with PSBI?(Yes <sub>1</sub> / No <sub>2</sub> )                                  | [ ] |
| <b>2.5</b> | <b>Monitoring and Supervision activities (Yes<sub>1</sub> / No<sub>2</sub>)</b>                                                          |     |
| 2.5.1      | Monitoring and supervision of activities of sub-centers through regular meetings / periodic visits, etc.                                 | [ ] |
| 2.5.2      | Monitoring of National Health Programs                                                                                                   | [ ] |
| 2.5.3      | Monitoring activities of ASHAs                                                                                                           | [ ] |
| 2.5.4      | Visits of Medical Officer to all sub-centers at least once in a month                                                                    | [ ] |
| 2.5.5      | Visits of Health Assistants (Male) and LHV to sub-centers once a week                                                                    | [ ] |

### 3. Physical Infrastructure

| S.No.      | Infrastructure                                                                                                                                                                   | Status in PHC | Remarks/Gaps identified |
|------------|----------------------------------------------------------------------------------------------------------------------------------------------------------------------------------|---------------|-------------------------|
| <b>3.1</b> | <b>Location of PHC</b>                                                                                                                                                           |               |                         |
| 3.1.1      | Within village                                                                                                                                                                   |               |                         |
| 3.1.2      | Far from village (specify distance in km)                                                                                                                                        |               |                         |
| 3.1.3      | Located in easily accessible area? (Yes/No)                                                                                                                                      |               |                         |
| 3.1.3      | Distance of PHC (in km) from the farthest village in coverage area.                                                                                                              |               |                         |
| 3.1.4      | Travel time (in minutes) to reach the PHC from farthest village in coverage area.                                                                                                |               |                         |
| 3.1.5      | Distance of PHC (in km) from the nearest village in coverage area.                                                                                                               |               |                         |
| 3.1.6      | Travel time (in minutes) to reach the PHC from nearest village in coverage area.                                                                                                 |               |                         |
| 3.1.7      | Distance of PHC (in km) from the CHC.                                                                                                                                            |               |                         |
| 3.1.8      | Distance of PHC (in km) from District Hospital.                                                                                                                                  |               |                         |
| <b>3.2</b> | <b>Building</b>                                                                                                                                                                  |               |                         |
| 3.2.1      | Designated Government building (Yes <sub>1</sub> / No <sub>2</sub> )                                                                                                             | [ ]           |                         |
| 3.2.2      | Other:<br>(Rented premises, other govt. building - specify.)                                                                                                                     |               |                         |
| 3.2.3      | State of construction<br>1. Complete<br>2. Incomplete                                                                                                                            | [ ]           |                         |
| 3.2.4      | Area of the building (sq. m)                                                                                                                                                     |               |                         |
| 3.2.5      | Condition of plaster on walls:<br>1. Well plastered with plaster intact everywhere<br>2. Plaster coming off in some places<br>3. Plaster coming off in many places or no plaster | [ ]           |                         |
| 3.2.6      | Condition of floor:<br>1. Floor in good condition<br>2. Floor coming off in some places                                                                                          | [ ]           |                         |

|            |                                                                                                                                                                  |     |  |
|------------|------------------------------------------------------------------------------------------------------------------------------------------------------------------|-----|--|
|            | 3. Floor coming off in many places or no proper flooring                                                                                                         |     |  |
| 3.2.7      | Cleanliness (Good <sub>1</sub> /Fair <sub>2</sub> /Poor <sub>3</sub> )                                                                                           |     |  |
| A          | OPD                                                                                                                                                              | [ ] |  |
| B          | Ward                                                                                                                                                             | [ ] |  |
| C          | Rooms                                                                                                                                                            | [ ] |  |
| D          | Toilets                                                                                                                                                          | [ ] |  |
| 3.2.8      | Residence quarters for MO/other staff available? (Yes/No)                                                                                                        | [ ] |  |
| 3.2.9      | Pharmacy for drug dispensing and drug storage (Yes/No)                                                                                                           | [ ] |  |
| 3.2.10     | Waiting room for patients (Yes/No)                                                                                                                               | [ ] |  |
| 3.2.11     | Emergency Room / Casualty (Yes/No)                                                                                                                               | [ ] |  |
| 3.2.12     | Laboratory (Yes/No)                                                                                                                                              | [ ] |  |
| 3.2.13     | Labour room available? (Yes/ No)                                                                                                                                 | [ ] |  |
| A          | If labour room is present, are deliveries carried out in the labour room?                                                                                        | [ ] |  |
| B          | If labour room is present but deliveries are not being conducted there, then what are the reasons for the same?                                                  |     |  |
| 3.2.14     | Separate wards for males and females (Yes/No)                                                                                                                    | [ ] |  |
| A          | No. of beds (male)                                                                                                                                               | [ ] |  |
| B          | No. of beds (female)                                                                                                                                             | [ ] |  |
| C          | Specific ward for children                                                                                                                                       | [ ] |  |
| D          | New born corner                                                                                                                                                  | [ ] |  |
| 3.2.15     | Separate public utilities for males and females (Yes/No)                                                                                                         | [ ] |  |
| 3.2.16     | Adequate no. of windows in the room for light and air in each room (Yes/No)                                                                                      | [ ] |  |
| 3.2.17     | Vehicle (ambulance/other vehicle) available? (Yes / No)                                                                                                          | [ ] |  |
| <b>3.3</b> | <b>Electricity</b>                                                                                                                                               |     |  |
| 3.3.1      | Is there electric line in all parts of the PHC?<br>1. In all parts<br>2. In some parts<br>3. None                                                                | [ ] |  |
| 3.3.2      | Regular Power Supply<br>1. Continuous Power Supply<br>2. Occasional power failure<br>3. Power cuts in summer only<br>4. Regular power cuts<br>5. No power supply | [ ] |  |
| 3.3.3      | Stand by facility (generator) available in working condition (Yes / No)                                                                                          | [ ] |  |
| <b>3.4</b> | <b>Water Supply</b><br>1. Piped<br>2. Bore well/ hand pump/tube well<br>3. Well<br>4. Other (specify)                                                            | [ ] |  |

#### 4. Manpower

| S.No.        | Personnel                                  | Current Availability at PHC (Yes <sub>1</sub> / No <sub>2</sub> ) | Working Hours and Days | Remarks / Suggestions / Identified Gaps (Provide duration of availability) |
|--------------|--------------------------------------------|-------------------------------------------------------------------|------------------------|----------------------------------------------------------------------------|
| 1            | Medical Officer                            | [ ]                                                               |                        |                                                                            |
| 2            | Pharmacist                                 | [ ]                                                               |                        |                                                                            |
| 3            | Nurse - Midwife (Staff Nurse)              | [ ]                                                               |                        |                                                                            |
| 4            | Health Worker (Female)                     | [ ]                                                               |                        |                                                                            |
| 5            | Health Educator                            | [ ]                                                               |                        |                                                                            |
| 6            | Health Assistant (One male and One female) | [ ]                                                               |                        |                                                                            |
| 7            | Clerks                                     | [ ]                                                               |                        |                                                                            |
| 8            | Laboratory Technician                      | [ ]                                                               |                        |                                                                            |
| 9            | Driver                                     | [ ]                                                               |                        |                                                                            |
| 10           | Class IV                                   | [ ]                                                               |                        |                                                                            |
| <b>Total</b> |                                            | [ ]                                                               |                        |                                                                            |

#### 5. Training of personnel during previous (full) year

| 5.1. | Available training for                                                                                                                      | Training provided (With duration) | Remarks |
|------|---------------------------------------------------------------------------------------------------------------------------------------------|-----------------------------------|---------|
| a.   | Health Worker (Female)                                                                                                                      |                                   |         |
| b.   | Health Worker (Male)                                                                                                                        |                                   |         |
| c.   | Medical Officer                                                                                                                             |                                   |         |
| d.   | Initial and periodic training of paramedics in treatment of minor ailments                                                                  |                                   |         |
| e.   | Training of ASHAs                                                                                                                           |                                   |         |
| f.   | Periodic training of Doctors through Continuing Medical Education, conferences, skill development training etc. on emergency obstetric care |                                   |         |
| g.   | Training of Health Workers in antenatal care and skilled birth attendance                                                                   |                                   |         |

#### 6. Essential Equipment

| Sr. No. | Equipment                                                                                                                                                                                  | Available | Functional | Remarks / Suggestions / Identified Gaps |
|---------|--------------------------------------------------------------------------------------------------------------------------------------------------------------------------------------------|-----------|------------|-----------------------------------------|
| 1       | Weighing scale                                                                                                                                                                             |           |            |                                         |
| 2       | Baby warmer/incubator                                                                                                                                                                      |           |            |                                         |
| 3       | Head circumference measurement tape                                                                                                                                                        |           |            |                                         |
| 4       | Respiratory rate timer                                                                                                                                                                     |           |            |                                         |
| 5       | Thermometer                                                                                                                                                                                |           |            |                                         |
| 6       | Gloves (various sizes)                                                                                                                                                                     |           |            |                                         |
| 7       | Disposable bags and masks                                                                                                                                                                  |           |            |                                         |
| 8       | Normal Delivery Kit                                                                                                                                                                        |           |            |                                         |
| 9       | Equipment for assisted vacuum delivery                                                                                                                                                     |           |            |                                         |
| 10      | Equipment for assisted forceps delivery                                                                                                                                                    |           |            |                                         |
| 11      | Standard Surgical Set (for minor procedures like episiotomies stitching)                                                                                                                   |           |            |                                         |
| 12      | Equipment for Manual Vacuum Aspiration                                                                                                                                                     |           |            |                                         |
| 13      | Equipment for New Born Care and Neonatal Resuscitation                                                                                                                                     |           |            |                                         |
| 14      | IUD insertion kit                                                                                                                                                                          |           |            |                                         |
| 15      | ILR/Deep Freezer                                                                                                                                                                           |           |            |                                         |
| 16      | Ice box                                                                                                                                                                                    |           |            |                                         |
| 17      | Radiant warmer for new born baby                                                                                                                                                           |           |            |                                         |
| 18      | Phototherapy unit                                                                                                                                                                          |           |            |                                         |
| 19      | Feeding tubes for baby                                                                                                                                                                     |           |            |                                         |
| 20      | Self-inflating bag and mask-neonatal size                                                                                                                                                  |           |            |                                         |
| 21      | Equipment for Eye care and vision testing: Tonometers (Schiotz), direct ophthalmoscope, illuminated vision testing drum, trial lens sets with trial frames, snellen and near vision charts |           |            |                                         |

## 7. Drugs

| S.No. | Drug                                                                                    | Availability | Remarks |
|-------|-----------------------------------------------------------------------------------------|--------------|---------|
| 1.    | <b>In the past 6 months has there been continuous supply and availability of drugs?</b> |              |         |
| 2.    | <b>How long does it take between medicine requisition request and stock delivery?</b>   |              |         |
| 3.    | <b>When is the request for restocking sent?</b>                                         |              |         |
| A     | Monthly basis                                                                           |              |         |
| B     | At low stock levels                                                                     |              |         |
| 4.    | <b>From where are the medicines procured from?</b>                                      |              |         |
| 5.    | <b>Essential Drugs Required:</b>                                                        |              |         |
| A     | Paracetamol Tablets/Syrup                                                               |              |         |
| B     | Oral rehydration solution                                                               |              |         |
| C     | Ampicillin tab                                                                          |              |         |
| D     | Zinc Sulphate Dispersible tab                                                           |              |         |
| E     | Gentamycin injection                                                                    |              |         |
| F     | Sodium chloride (normal saline)                                                         |              |         |
| G     | Albendazole                                                                             |              |         |
| H     | Aluminum Hydroxide                                                                      |              |         |
| I     | Amoxicillin                                                                             |              |         |
| J     | Calamine Lotion                                                                         |              |         |
| K     | Calcium Carbonate                                                                       |              |         |

|   |                               |  |  |
|---|-------------------------------|--|--|
| L | Chlorhexidine                 |  |  |
| M | Chlorpheniramine              |  |  |
| N | Chloramphenicol               |  |  |
| O | Diazepam – Rectal suppository |  |  |
| P | Dicyclomine                   |  |  |
| Q | Domperidone                   |  |  |
| R | Ferrous Sulfate + Folic Acid  |  |  |
| S | Furazolidone                  |  |  |
| T | Gentian Violet 1% solution    |  |  |
| U | Metronidazole                 |  |  |
| V | Miconazole 1% cream           |  |  |
| W | Primaquine                    |  |  |
| X | Sodium Bicarbonate            |  |  |
| Y | Vitamin A liquid              |  |  |
| Z | Vitamin B complex             |  |  |

### 8. Essential Laboratory Services

| Sr. No. | Service                                                   | Availability (Yes/No) | Comments/Remarks |
|---------|-----------------------------------------------------------|-----------------------|------------------|
| 1       | Routine urine, stool and blood tests                      |                       |                  |
| 2       | Blood grouping                                            |                       |                  |
| 3       | Bleeding time, clotting time                              |                       |                  |
| 4       | Diagnosis of RTI/STDs with wet mounting, grams stain etc. |                       |                  |
| 5       | Sputum testing for TB                                     |                       |                  |
| 6       | Blood smear examination for malaria parasite              |                       |                  |
| 7       | Rapid tests for pregnancy                                 |                       |                  |
| 8       | Rapid tests for HIV                                       |                       |                  |
| 9       | Others (specify)                                          |                       |                  |

### 9. Records/Registers Maintained

| S.No. | Name | Complete/Incomplete | Remarks |
|-------|------|---------------------|---------|
| 1.    |      |                     |         |
| 2.    |      |                     |         |
| 3.    |      |                     |         |
| 4.    |      |                     |         |
| 5.    |      |                     |         |

### 10. Additional remarks
