# Supplementary material for: Management of possible serious bacterial infection in young infants closer to home when referral is not feasible: Lessons from implementation research in Himachal Pradesh, India
Source: PubMed Central journal article supplement (PMC7755274; doi:10.1371/journal.pone.0243724), 2020-12-22
Supplement: pone.0243724.s010.pdf [file pone.0243724.s010.pdf]

**Implementation Research on management of Possible Serious Bacterial Infection in young infants where referral is not feasible through strengthening of existing Home Based newborn care program of the Government of India**

**BASELINE SURVEY  
MOTHER QUESTIONNAIRE**

*(Highlighted section not be asked directly)*

*Questions marked with \* to be collected for Himachal Pradesh only*

**Section I: Identification भाग-1: पहचान**

|      |                                                                                                                                                                                                                                               |     |                                                                          |
|------|-----------------------------------------------------------------------------------------------------------------------------------------------------------------------------------------------------------------------------------------------|-----|--------------------------------------------------------------------------|
| 1.1  | Site ID: Haryana <sub>1</sub> /Himachal Pradesh <sub>2</sub> /Maharashtra <sub>3</sub> /Uttar Pradesh <sub>4</sub> [ ]<br>साइट क्रमांक: हरियाणा <sub>1</sub> / हिमाचल प्रदेश <sub>2</sub> /महाराष्ट्र <sub>3</sub> /उत्तर प्रदेश <sub>4</sub> |     |                                                                          |
| 1.2  | District Name:<br>जनपद का नाम:                                                                                                                                                                                                                | 1.3 | Block Name:<br>ब्लाक का नाम:                                             |
| 1.4  | CHC Name:<br>सामुदायिक स्वास्थ्य केन्द्र नाम                                                                                                                                                                                                  | 1.5 | PHC Name:<br>प्राथमिक स्वास्थ्य केन्द्र नाम:                             |
| 1.6  | Sub Centre Name:<br>उप केन्द्र का नाम:                                                                                                                                                                                                        | 1.7 | Village Name:<br>गाँव का नाम:                                            |
| 1.8  | ASHA Name:<br>आशा का नाम:                                                                                                                                                                                                                     | 1.9 | ASHA Mobile Number:<br>आशा का मोबाइल नं०: [ ][ ][ ][ ][ ][ ][ ][ ][ ][ ] |
| 1.10 | MCTS ID of Mother : Available <sub>1</sub> /Not Available Today <sub>2</sub> माँ का एमसीटीएस क्रमांक उपलब्ध <sub>1</sub> /आज अनुपलब्ध <sub>2</sub> [ ]                                                                                        |     |                                                                          |
| 1.11 | MCTS ID of Mother: [ ][ ][ ][ ][ ][ ][ ][ ][ ][ ][ ][ ][ ][ ][ ][ ][ ][ ][ ][ ][ ][ ][ ]<br>माँ का एमसीटीएस क्रमांक:                                                                                                                          |     |                                                                          |
| 1.12 | MCTS ID of Child बच्चों का एमसीटीएस क्रमांक : Available <sub>1</sub> /Not Available Today <sub>2</sub> उपलब्ध <sub>1</sub> /आज अनुपलब्ध <sub>2</sub> [ ]                                                                                      |     |                                                                          |
| 1.13 | MCTS ID of Child : बच्चों का एमसीटीएस क्रमांक [ ][ ][ ][ ][ ][ ][ ][ ][ ][ ][ ][ ][ ][ ][ ][ ][ ][ ][ ][ ][ ][ ][ ]                                                                                                                           |     |                                                                          |

**Section 2: Socio Demographic Characteristics भाग-2: सामाजिक जनसांख्यिकीय विवरण**

| Bio-Social Profile of Family परिवार का जैव सामाजिक प्रारूप |                                                                                     |                                                                                                                                                                                                                                                                                                                                                                                                                       |
|------------------------------------------------------------|-------------------------------------------------------------------------------------|-----------------------------------------------------------------------------------------------------------------------------------------------------------------------------------------------------------------------------------------------------------------------------------------------------------------------------------------------------------------------------------------------------------------------|
| 2.1                                                        | Religion / धर्म                                                                     | Hindu <sub>1</sub> / Muslim <sub>2</sub> /Other <sub>3</sub> (specify) _____ [ ]<br>हिन्दू <sub>1</sub> /मुस्लिम <sub>2</sub> /अन्य <sub>3</sub> (उल्लेख करें).....                                                                                                                                                                                                                                                   |
| 2.2                                                        | Caste जाति                                                                          | General <sub>1</sub> /OBC <sub>2</sub> /SC <sub>3</sub> /ST <sub>4</sub> [ ]<br>सामान्य <sub>1</sub> /अन्य पिछड़ा वर्ग <sub>2</sub> /अनुसूचित जाति <sub>3</sub> / अनुसूचित जनजाति <sub>4</sub>                                                                                                                                                                                                                        |
| 2.3                                                        | Type of family परिवार का प्रकार                                                     | Nuclear <sub>1</sub> /Joint <sub>2</sub> [ ]<br>एकल <sub>1</sub> /संयुक्त <sub>2</sub>                                                                                                                                                                                                                                                                                                                                |
| 2.4                                                        | Number of family members परिवार के सदस्यों की संख्या [ ][ ]                         |                                                                                                                                                                                                                                                                                                                                                                                                                       |
| 2.5                                                        | Total family expenditure per month कुल पारिवारिक मासिक व्यय                         | (Write '999999' if not known)<br>(अगर नहीं पता तो '999999' लिखें) [ ][ ][ ][ ][ ][ ][ ][ ]                                                                                                                                                                                                                                                                                                                            |
| 2.6                                                        | Total family monthly saving कुल पारिवारिक मासिक बचत                                 | • Write '000000' in case of no monthly saving अगर कोई मासिक बचत नहीं तो '000000' लिखें [ ][ ][ ][ ][ ][ ][ ][ ]<br>• Write '999999' if unknown अगर पता नहीं तो '999999' लिखें                                                                                                                                                                                                                                         |
| 2.7                                                        | Total loan on family on date of interview कुल पारिवारिक ऋण साक्षात्कार के दिनांक तक | • Write '000000' in case of no loan लिखें '000000' अगर कोई कर्ज नहीं [ ][ ][ ][ ][ ][ ][ ][ ]<br>• Write '999999' if unknown अगर नहीं पता तो '999999' लिखें                                                                                                                                                                                                                                                           |
| Characteristics of Parents माता-पिता का विवरण              |                                                                                     |                                                                                                                                                                                                                                                                                                                                                                                                                       |
| 2.8                                                        | Age of Mother माता की उम्र                                                          | (completed years) (पूर्ण वर्षों में) [ ][ ]<br>Check Mother Child Protection (MCP) Card (एम०सी०पी० कार्ड के अनुसार)                                                                                                                                                                                                                                                                                                   |
| 2.9                                                        | Education of Mother (completed) माता की पूर्ण शिक्षा                                | Illiterate <sub>1</sub> /Primary level <sub>2</sub> /Middle school <sub>3</sub> /<br>Highschool <sub>4</sub> /Intermediate <sub>5</sub> /Graduate <sub>6</sub> /Postgraduate <sub>7</sub> /Professional <sub>8</sub> [ ]<br>अशिक्षित <sub>1</sub> /प्राथमिक <sub>2</sub> /माध्यमिक <sub>3</sub> /हाई स्कूल <sub>4</sub> /इंटरमीडिएट <sub>5</sub> /स्नातक <sub>6</sub> /परास्नातक <sub>7</sub> /व्यवसायिक <sub>8</sub> |

|                                                       |                                                                                                                          |                                                                                                                                                                                                                                                                                                                                                                                                                                |                                                                                                                                                                                                                                                                                                              |
|-------------------------------------------------------|--------------------------------------------------------------------------------------------------------------------------|--------------------------------------------------------------------------------------------------------------------------------------------------------------------------------------------------------------------------------------------------------------------------------------------------------------------------------------------------------------------------------------------------------------------------------|--------------------------------------------------------------------------------------------------------------------------------------------------------------------------------------------------------------------------------------------------------------------------------------------------------------|
| 2.10                                                  | Occupation of Mother<br>माता का व्यवसाय                                                                                  | Housewife <sub>1</sub> /Un-skilled worker <sub>2</sub> /Skilled worker <sub>3</sub> /Farmer <sub>4</sub> /Shop owner <sub>5</sub> /Clerical <sub>6</sub> /Professional <sub>7</sub><br>गृहणी <sub>1</sub> /अकुशलकारीगर <sub>2</sub> /कुशल कारीगर <sub>3</sub> /किसान <sub>4</sub> /दुकानदार <sub>5</sub> /लिपिक <sub>6</sub> /व्यवसायिक <sub>7</sub>                                                                           | [ ]                                                                                                                                                                                                                                                                                                          |
| 2.10.1*                                               | <b>If working outside</b>                                                                                                | <b>Number of hours spent away from home</b> घर से बाहर कितने घंटे।                                                                                                                                                                                                                                                                                                                                                             | [ ][ ]                                                                                                                                                                                                                                                                                                       |
| 2.11                                                  | Age of Father<br>पिता की उम्र                                                                                            | (completed years)                                                                                                                                                                                                                                                                                                                                                                                                              | (पूर्ण वर्षों में) [ ][ ]                                                                                                                                                                                                                                                                                    |
| 2.12                                                  | Education of<br>(completed)<br>पिता की पूर्ण शिक्षा                                                                      | Illiterate <sub>1</sub> /Primary level <sub>2</sub> /Middle School <sub>3</sub><br>/High School <sub>4</sub> /Intermediate <sub>5</sub> /Graduate <sub>6</sub> /Postgraduate <sub>7</sub> /Professional <sub>8</sub><br>अशिक्षित <sub>1</sub> /प्राथमिक <sub>2</sub> /माध्यमिक <sub>3</sub> /हाईस्कूल <sub>4</sub> /इण्टरमीडिएट <sub>5</sub> /स्नातक <sub>6</sub> /परास्नातक <sub>7</sub> /व्यवसायिक <sub>8</sub>              | [ ]                                                                                                                                                                                                                                                                                                          |
| 2.13                                                  | Occupation of Father<br>पिता का व्यवसाय                                                                                  | Unemployed <sub>1</sub> / Un-skilled worker <sub>2</sub> /Skilled worker <sub>3</sub> /Farmer <sub>4</sub> /Shop owner <sub>5</sub> /Clerical <sub>6</sub> /Professional <sub>7</sub><br>बेरोजगार <sub>1</sub> /अकुशलकारीगर <sub>2</sub> /कुशल कारीगर <sub>3</sub> /किसान <sub>4</sub> /दुकानदार <sub>5</sub> /लिपिक <sub>6</sub> /व्यवसायिक <sub>7</sub>                                                                      | [ ]                                                                                                                                                                                                                                                                                                          |
| <b>Details of Index Child चिन्हित बच्चों का विवरण</b> |                                                                                                                          |                                                                                                                                                                                                                                                                                                                                                                                                                                |                                                                                                                                                                                                                                                                                                              |
| 2.14                                                  | Age आयु                                                                                                                  |                                                                                                                                                                                                                                                                                                                                                                                                                                | दिन days [ ][ ]                                                                                                                                                                                                                                                                                              |
| 2.15                                                  | Gender लिंग                                                                                                              | Male <sub>1</sub> /Female <sub>2</sub> पुरुष <sub>1</sub> /महिला <sub>2</sub>                                                                                                                                                                                                                                                                                                                                                  | [ ]                                                                                                                                                                                                                                                                                                          |
| 2.16                                                  | Birth order<br>जन्म का क्रम                                                                                              |                                                                                                                                                                                                                                                                                                                                                                                                                                | [ ][ ]                                                                                                                                                                                                                                                                                                       |
| 2.17                                                  | Weight at birth जन्म के समय वजन<br>(Check Records –MCP Card)<br>(एम०सी०पी०कार्ड के अनुसार)                               |                                                                                                                                                                                                                                                                                                                                                                                                                                | (in grams) ग्राम में<br>[ ][ ][ ][ ]<br>(Write 9999 if not known)<br>(जानकारी प्राप्त न होने पर 9999 लिखें)<br>[ ]<br>Tick ✓ here when weight not available in MCP card and recorded as told by mother (सही का चिन्ह (✓) लगाये यदि वजन एम०सी०पी०सी० कार्ड में उपलब्ध नहीं है और माता द्वारा मौखिक बताया गया) |
| 2.18                                                  | Classify according to weight<br>(for office use only)<br>वजन के आधार पर वर्गीकरण (कार्यालय हेतु)                         | Assessment<br>Normal weight <sub>1</sub> /Low birth weight <sub>2</sub> /Very low birth weight <sub>3</sub> /no assessment <sub>9</sub><br>सामान्य वजन <sub>1</sub> /कम वजन <sub>2</sub> /बहुत कम वजन <sub>3</sub> /बहुत कम वजन <sub>4</sub> /मूल्यांकन नहीं <sub>9</sub>                                                                                                                                                      | [ ]                                                                                                                                                                                                                                                                                                          |
| 2.19                                                  | Gestational age गर्भ की अवधि<br>(Check Records –MCP Card) (एम०सी०पी० कार्ड के अनुसार)                                    | a. Date of LMP before pregnancy गर्भधारण से पूर्व मासिक की अंतिम तिथि<br>[ ][ ]/[ ][ ]/[ ][ ][ ]<br>dd mm yyyy<br>दिन माह वर्ष<br>(Write 99/99/9999 if not date known/not available)<br>(रिकार्ड उपलब्ध न होने पर 99/99/9999 लिखें)<br><br>b. Date of delivery डिलवरी की तिथि<br>[ ][ ]/[ ][ ]/[ ][ ][ ]<br>dd mm yyyy<br>दिन माह वर्ष<br><br>c. Gestational age (In Weeks)<br>(for office use only) (कार्यालय हेतु)<br>[ ][ ] | [ ][ ]                                                                                                                                                                                                                                                                                                       |
| 2.20                                                  | Classify gestational Age<br>गर्भावधि उम्र में वर्गीकृत (कार्यालय हेतु)<br>(for office use only)                          | Assessment मूल्यांकन<br>Term <sub>1</sub> /Preterm <sub>2</sub> /Post term <sub>3</sub> /No Assessment <sub>9</sub><br>समय से <sub>1</sub> /समयपूर्व <sub>2</sub> /समय पश्चात <sub>3</sub> /मूल्यांकन नहीं <sub>9</sub><br>...                                                                                                                                                                                                 | [ ]                                                                                                                                                                                                                                                                                                          |
| 2.21                                                  | What was mother's perception about the child at the time of birth?<br>जन्म के समय माँ की बच्चों के बारे में क्या राय थी? | Normal <sub>1</sub> /Weak <sub>2</sub> /Very weak <sub>3</sub><br>सामान्य <sub>1</sub> /कमजोर <sub>2</sub> /अत्यधिक कमजोर <sub>3</sub>                                                                                                                                                                                                                                                                                         | [ ]                                                                                                                                                                                                                                                                                                          |

**Section 3: Antenatal Care (ANC) in Index Neonate**

भाग-3 प्रसवपूर्व देखभाल (ANC) चिन्हित नवजात के सन्दर्भ में

**Pregnancy registration and ANC गर्भधारण का पंजीकरण और (ANC)**

|     |                                                                                                                                    |                                                               |     |
|-----|------------------------------------------------------------------------------------------------------------------------------------|---------------------------------------------------------------|-----|
| 3.1 | Was there any contact of mother with ASHA during antenatal period?<br>क्या गर्भावस्था के दौरान माँ की आशा से कोई मुलाकात हुयी थी ? | Yes <sub>1</sub> हाँ<br>No <sub>2</sub> नहीं                  | [ ] |
| 3.2 | Was the ANC registered?<br>क्या इस गर्भावस्था का प्रसव पूर्व देखभाल का पंजीकरण हुआ था?                                             | Yes <sub>1</sub> हाँ<br>No <sub>2</sub> नहीं (Q.3.6 पर जायें) | [ ] |

|                                                                                                                                                                                |                                                                                                                                                                                                                                        |                                                                                                                                                                                                                                                                                                                                                                                                 |                                   |                                                                                                                    |                                   |                                 |
|--------------------------------------------------------------------------------------------------------------------------------------------------------------------------------|----------------------------------------------------------------------------------------------------------------------------------------------------------------------------------------------------------------------------------------|-------------------------------------------------------------------------------------------------------------------------------------------------------------------------------------------------------------------------------------------------------------------------------------------------------------------------------------------------------------------------------------------------|-----------------------------------|--------------------------------------------------------------------------------------------------------------------|-----------------------------------|---------------------------------|
| 3.3                                                                                                                                                                            | What was the month of pregnancy at the time of registration?<br>पंजीकरण के समय गर्भावस्था का कौन सा माह था?                                                                                                                            |                                                                                                                                                                                                                                                                                                                                                                                                 |                                   |                                                                                                                    | [ ] माह                           |                                 |
| 3.4                                                                                                                                                                            | Where was the ANC registration done?<br>प्रसव पूर्व देखभाल का पंजीकरण कहाँ हुआ था?                                                                                                                                                     | At the village <sub>1</sub> / Sub-centre <sub>2</sub> /PHC <sub>3</sub> /<br>CHC <sub>4</sub> /Bal Mahila Chikatsalaya (BMC) <sub>5</sub> /<br>Other <sub>6</sub> Specify: _____<br>गाँव में <sub>1</sub> /उपकेन्द्र <sub>2</sub> /प्राथमिक स्वास्थ्य केन्द्र <sub>3</sub> /सामुदायिक स्वास्थ्य<br>केन्द्र <sub>4</sub> /बाल महिला चिकित्सालय <sub>5</sub> / अन्य <sub>6</sub> स्पष्ट करे _____ |                                   |                                                                                                                    |                                   | [ ]                             |
| 3.5                                                                                                                                                                            | Did mother receive any antenatal care during pregnancy of the index neonate from the place of registration?<br>जिस जगह माँ का पंजीकरण हुआ क्या वहाँ चिह्नित नवजात की गर्भावस्था के दौरान प्रसव पूर्व देखभाल दी गई?                     | Yes <sub>1</sub> हाँ<br>No <sub>2</sub> नहीं                                                                                                                                                                                                                                                                                                                                                    |                                   |                                                                                                                    |                                   | [ ]                             |
| 3.6                                                                                                                                                                            | Total no. of antenatal visits anywhere done by the mother<br>प्रसव पूर्व भ्रमणों की संख्या                                                                                                                                             |                                                                                                                                                                                                                                                                                                                                                                                                 |                                   |                                                                                                                    | [ ] [ ]                           |                                 |
| 3.6.1*                                                                                                                                                                         | <b>Total no. of antenatal visits in first trimester</b><br>गर्भावस्था के पहले तीन महीनों में कितनी बार प्रसव पूर्व जांच हुई                                                                                                            |                                                                                                                                                                                                                                                                                                                                                                                                 |                                   |                                                                                                                    | [ ]                               |                                 |
| 3.6.2*                                                                                                                                                                         | <b>Total no. of antenatal visits in second trimester</b><br>गर्भावस्था के दूसरे तीन महीनों में कितनी बार प्रसव पूर्व जांच हुई                                                                                                          |                                                                                                                                                                                                                                                                                                                                                                                                 |                                   |                                                                                                                    | [ ]                               |                                 |
| 3.6.3*                                                                                                                                                                         | <b>Total no. of antenatal visits in third trimester</b><br>गर्भावस्था के तीसरे तीन महीनों में कितनी बार प्रसव पूर्व जांच हुई                                                                                                           |                                                                                                                                                                                                                                                                                                                                                                                                 |                                   |                                                                                                                    | [ ]                               |                                 |
| <b>Counseling about newborn care and danger signs during antenatal/ postnatal period</b><br>प्रसवपूर्व/प्रसव पश्चात नवजात की देखभाल और खतरों के लक्षणों के सम्बन्ध में परामर्श |                                                                                                                                                                                                                                        |                                                                                                                                                                                                                                                                                                                                                                                                 |                                   |                                                                                                                    |                                   |                                 |
| 3.7                                                                                                                                                                            | Did you get counseling on newborn care during the antenatal visits?<br>क्या आपको नवजात की देखभाल हेतु प्रसव पूर्व परामर्श मिला था?                                                                                                     | Yes <sub>1</sub> हाँ<br>No <sub>2</sub> नहीं (go to 3.9)                                                                                                                                                                                                                                                                                                                                        |                                   |                                                                                                                    |                                   | [ ]                             |
| 3.8                                                                                                                                                                            | Who gave this counseling during antenatal period?<br>आपको प्रसव पूर्व परामर्श किसके द्वारा प्रदान किया गया?<br>(write all responses given)                                                                                             | ASHA <sub>1</sub> /ANM <sub>2</sub> /staff nurse <sub>3</sub> /government doctor <sub>4</sub> /<br>private doctor <sub>5</sub> / Other <sub>6</sub> Specify.....<br>आशा <sub>1</sub> /ए०एन०एम० <sub>2</sub> /स्टाफ नर्स <sub>3</sub> /सरकारी चिकित्सक <sub>4</sub> / निजी चिकित्सक <sub>5</sub> /अन्य कोई <sub>6</sub><br>स्पष्ट करें.....                                                      |                                   |                                                                                                                    |                                   | [ ]<br>[ ]<br>[ ]<br>[ ]        |
| 3.9                                                                                                                                                                            | Did you get counseling on newborn care during postnatal visits<br>क्या आपको प्रसव पश्चात नवजात की देखभाल के बारे में परामर्श मिला?                                                                                                     | Yes <sub>1</sub> हाँ<br>No <sub>2</sub> नहीं (go to 3.11.1)                                                                                                                                                                                                                                                                                                                                     |                                   |                                                                                                                    |                                   | [ ]                             |
| 3.10                                                                                                                                                                           | Who gave you this counseling during postnatal period?<br>आपको प्रसव पश्चात परामर्श किसके द्वारा प्रदान किया गया?<br>(write all responses given)                                                                                        | ASHA <sub>1</sub> /ANM <sub>2</sub> /staff nurse <sub>3</sub> /government doctor <sub>4</sub> /<br>private doctor <sub>5</sub> / Other <sub>6</sub><br>Specify.....<br>आशा <sub>1</sub> /ए०एन०एम० <sub>2</sub> /स्टाफ नर्स <sub>3</sub> /सरकारी चिकित्सक <sub>4</sub> /निजी चिकित्सक <sub>5</sub> /अन्य<br>कोई <sub>6</sub> /स्पष्ट करें। _____                                                 |                                   |                                                                                                                    |                                   | [ ]<br>[ ]<br>[ ]<br>[ ]<br>[ ] |
| 3.11                                                                                                                                                                           | What counseling on young infant care was given to you during the antenatal/postnatal visits?<br>निम्नलिखित बिन्दुओं में से किन-किन बिन्दुओं पर आपको प्रसवपूर्व/प्रसव पश्चात भ्रमण के दौरान शिशु की देखभाल के सम्बन्ध में परामर्श मिला? | <b>3.11.1 ANTENATAL</b><br>प्रसव पूर्व<br>मिली देखभाल के आगे सही का निशान✓<br>लगाये अन्यथा क्रॉस X का निशान लगाये                                                                                                                                                                                                                                                                               |                                   | <b>3.11.2 POSTNATAL</b><br>प्रसव पश्चात<br>मिली देखभाल के आगे सही का निशान✓<br>लगाये अन्यथा क्रॉस X का निशान लगाये |                                   |                                 |
|                                                                                                                                                                                |                                                                                                                                                                                                                                        | <i>Spontaneous</i><br>अपने आप बताया                                                                                                                                                                                                                                                                                                                                                             | <i>Prompted</i><br>पूछने पर बताया | <i>Spontaneous</i><br>अपने आप बताया                                                                                | <i>Prompted</i><br>पूछने पर बताया |                                 |
| a.                                                                                                                                                                             | Cord Care नाल की देखभाल                                                                                                                                                                                                                | [ ]                                                                                                                                                                                                                                                                                                                                                                                             | [ ]                               | [ ]                                                                                                                | [ ]                               |                                 |
| b.                                                                                                                                                                             | Eye Care आँखों की देखभाल                                                                                                                                                                                                               | [ ]                                                                                                                                                                                                                                                                                                                                                                                             | [ ]                               | [ ]                                                                                                                | [ ]                               |                                 |
| c.                                                                                                                                                                             | Breast Feeding स्तनपान                                                                                                                                                                                                                 | [ ]                                                                                                                                                                                                                                                                                                                                                                                             | [ ]                               | [ ]                                                                                                                | [ ]                               |                                 |
| d.                                                                                                                                                                             | Wrapping बच्चों को लपेटना                                                                                                                                                                                                              | [ ]                                                                                                                                                                                                                                                                                                                                                                                             | [ ]                               | [ ]                                                                                                                | [ ]                               |                                 |
| e.                                                                                                                                                                             | Skin to skin contact त्वचा से त्वचा का लगाव                                                                                                                                                                                            | [ ]                                                                                                                                                                                                                                                                                                                                                                                             | [ ]                               | [ ]                                                                                                                | [ ]                               |                                 |
| f.                                                                                                                                                                             | Bathing नहलाना                                                                                                                                                                                                                         | [ ]                                                                                                                                                                                                                                                                                                                                                                                             | [ ]                               | [ ]                                                                                                                | [ ]                               |                                 |
| g.                                                                                                                                                                             | Routine Immunization नियमित टीकाकरण                                                                                                                                                                                                    | [ ]                                                                                                                                                                                                                                                                                                                                                                                             | [ ]                               | [ ]                                                                                                                | [ ]                               |                                 |
| h.                                                                                                                                                                             | 102/108 Ambulance Service<br>102/108 एम्बुलेंस सेवा                                                                                                                                                                                    | [ ]                                                                                                                                                                                                                                                                                                                                                                                             | [ ]                               | [ ]                                                                                                                | [ ]                               |                                 |

|      |                                                                                                                                                                                                                                   |                                                                                                           |                                                                                                            |
|------|-----------------------------------------------------------------------------------------------------------------------------------------------------------------------------------------------------------------------------------|-----------------------------------------------------------------------------------------------------------|------------------------------------------------------------------------------------------------------------|
| 3.12 | What information was given on danger signs in newborn during the antenatal/postnatal visits?<br>क्या आपको प्रसव पूर्व/प्रसव पश्चात भ्रमणों के दौरान शिशु में खतरों के लक्षणों से सम्बन्धित निम्नलिखित में से कोई सूचना दी गयी थी? | <b>3.12.1 ANTENATAL प्रसव पूर्व</b><br>मिली देखभाल के आगे सही का निशान/ लगाये अन्यथा कास X का निशान लगाये | <b>3.12.2 POSTNATAL प्रसव पश्चात</b><br>मिली देखभाल के आगे सही का निशान/ लगाये अन्यथा कास X का निशान लगाये |
|      | a. Not able to feed since birth/stopped feeding well or not feeding at all जन्म से स्तनपान करने में असमर्थ/स्तनपान अच्छे से करना बंद कर दिया या बिलकुल भी स्तनपान नहीं कर रहा                                                     | [ ]                                                                                                       | [ ]                                                                                                        |
|      | b. Convulsions/ Seizures ऐठना/झटके                                                                                                                                                                                                | [ ]                                                                                                       | [ ]                                                                                                        |
|      | c. Lower Chest Movements (Severe Chest Indrawing) पसली धंसना                                                                                                                                                                      | [ ]                                                                                                       | [ ]                                                                                                        |
|      | d. Hot to touch छूने पर गर्म महसूस होना                                                                                                                                                                                           | [ ]                                                                                                       | [ ]                                                                                                        |
|      | e. Feels cold to touch छूने पर ठन्डा महसूस होना                                                                                                                                                                                   | [ ]                                                                                                       | [ ]                                                                                                        |
|      | f. Movement only when stimulated केवल उद्दीपन पर हिलना डुलना                                                                                                                                                                      | [ ]                                                                                                       | [ ]                                                                                                        |
|      | g. Fast Breathing (breaths 60/minute or more) तेज सांस लेना (सांस 60/प्रति मिनट और अधिक)                                                                                                                                          | [ ]                                                                                                       | [ ]                                                                                                        |
|      | h. Jaundice पीलिया                                                                                                                                                                                                                | [ ]                                                                                                       | [ ]                                                                                                        |
|      | i. Diarrhea दस्त                                                                                                                                                                                                                  | [ ]                                                                                                       | [ ]                                                                                                        |
|      | j. Pustules (10 or more) or one large focus of infection मवाद से भरे दाने (10 और अधिक) अथवा एक बड़ा फोड़ा                                                                                                                         | [ ]                                                                                                       | [ ]                                                                                                        |
|      | k. Grunting कराहना                                                                                                                                                                                                                | [ ]                                                                                                       | [ ]                                                                                                        |

**Section 4: Intra-natal and Post-natal Care भाग-4 प्रसव के दौरान व प्रसव के पश्चात देखभाल**

|                                                                              |                                                                                                                                                                                                                                        |                                                                                                                                                                                                                                                                                                                                     |
|------------------------------------------------------------------------------|----------------------------------------------------------------------------------------------------------------------------------------------------------------------------------------------------------------------------------------|-------------------------------------------------------------------------------------------------------------------------------------------------------------------------------------------------------------------------------------------------------------------------------------------------------------------------------------|
| 4.1                                                                          | Date of delivery ( <i>Check Records –MCP Card</i> )<br>प्रसव का दिनांक (एम०सी०पी० कार्ड को देखें)                                                                                                                                      | [ ][ ]/[ ][ ]/[ ][ ][ ][ ]<br>dd mm yyyy<br>दिन माह वर्ष                                                                                                                                                                                                                                                                            |
| 4.2                                                                          | Place of delivery<br>प्रसव का स्थान                                                                                                                                                                                                    | Home <sub>1</sub> (go to 4.5)<br>Govt health facility <sub>2</sub><br>Private health facility <sub>3</sub><br>Other <sub>4</sub> [ ]<br>Specify: _____<br>प्रसव का स्थान:<br>घर पर <sub>1</sub> (4.5 पर जाये)<br>सरकारी स्वास्थ्य केन्द्र <sub>2</sub><br>निजी स्वास्थ्य केन्द्र <sub>3</sub><br>अन्य <sub>4</sub> स्पष्ट करें..... |
| 4.3                                                                          | Duration of stay in health facility after delivery ( <i>in days</i> )<br>प्रसव के पश्चात स्वास्थ्य केन्द्र पर ठहरने की अवधि (दिनों में)                                                                                                | [ ][ ] days                                                                                                                                                                                                                                                                                                                         |
| 4.3.1*                                                                       | <b>What information or advice did you receive from the facility regarding care of newborn at the time of discharge</b><br>सुविधा केंद्र से छुट्टी के समय आपको नवजात की देखभाल के बारे में क्या जानकारी दी गयी                          |                                                                                                                                                                                                                                                                                                                                     |
| 4.4                                                                          | If, duration of stay in health facility <1 day ( <i>in hours</i> )(write 99 if not applicable)<br>यदि प्रसव के पश्चात एक दिन से कम ठहरा हो तो घंटों में बताये घंटे में (लिखें '99' यदि लागू नहीं)                                      | [ ][ ] hours                                                                                                                                                                                                                                                                                                                        |
| 4.5                                                                          | Mode of delivery: Normal vaginal delivery <sub>1</sub> /Assisted <sub>2</sub> /Caesarian section <sub>3</sub><br>प्रसव का प्रकार: सामान्य प्रसव <sub>1</sub> /सहायता प्राप्त <sub>2</sub> /शल्य क्रिया द्वारा <sub>3</sub>             | [ ]                                                                                                                                                                                                                                                                                                                                 |
| <b>ASHA Home Visit Related Information आशा के गृह भ्रमण से संबंधित सूचना</b> |                                                                                                                                                                                                                                        |                                                                                                                                                                                                                                                                                                                                     |
| 4.6                                                                          | Did you get information of home visit provision to you or your baby in the postnatal period through ASHA (within 42 days of birth)?<br>क्या आपको यह बताया गया था कि बच्चे के जन्म से 42 दिनों तक अलग-अलग समय पर आशा आपके घर आती रहेगी? | Yes <sub>1</sub> /हाँ <sub>1</sub> [ ]<br>No <sub>2</sub> /नहीं <sub>2</sub><br>(go to 4.8)                                                                                                                                                                                                                                         |

|                                                                                                          |                                                                                                                                                                                                                                                                                                                                                                                                                                                                                                                                                                                                                                                                                                        |                       |                       |                         |                         |                         |                         |                                                              |                                                              |
|----------------------------------------------------------------------------------------------------------|--------------------------------------------------------------------------------------------------------------------------------------------------------------------------------------------------------------------------------------------------------------------------------------------------------------------------------------------------------------------------------------------------------------------------------------------------------------------------------------------------------------------------------------------------------------------------------------------------------------------------------------------------------------------------------------------------------|-----------------------|-----------------------|-------------------------|-------------------------|-------------------------|-------------------------|--------------------------------------------------------------|--------------------------------------------------------------|
| 4.7                                                                                                      | Person who gave you this information: (write all responses given) [ ]<br>AWW <sub>1</sub> /ASHA <sub>2</sub> /ANM <sub>3</sub> /Doctor <sub>4</sub> /Other <sub>5</sub> specify..... [ ]<br>किस व्यक्ति के द्वारा आपको यह सूचना प्राप्त हुयी? [ ]<br>आँगनवाडी कार्यकर्त्री <sub>1</sub> /आशा <sub>2</sub> /एएनएम <sub>3</sub> /चिकित्सक <sub>4</sub> /अन्य <sub>5</sub> स्पष्ट करे..... [ ]                                                                                                                                                                                                                                                                                                            |                       |                       |                         |                         |                         |                         |                                                              |                                                              |
| 4.8                                                                                                      | How many HBNC visits are scheduled to be completed by ASHA for this index child as on date of interview? (to filled by the interviewer): साक्षात्कार की तिथि तक चिह्नित शिशु के लिए कितनी एचबीएनसी विजिट प्रस्तावित हैं (साक्षात्कारकर्ता द्वारा भरे जाने हेतु) [ ]                                                                                                                                                                                                                                                                                                                                                                                                                                    |                       |                       |                         |                         |                         |                         |                                                              |                                                              |
| 4.9                                                                                                      | How many of these HBNC visits have been made by ASHA for this child till the date of interview (If `No` visit was done write 0 ) उत्तरदाता के अनुसार साक्षात्कार की तिथि तक आशा द्वारा कितनी एचबीएनसी विजिट पूर्ण कर ली गयी। [ ]                                                                                                                                                                                                                                                                                                                                                                                                                                                                       |                       |                       |                         |                         |                         |                         |                                                              |                                                              |
| 4.10                                                                                                     | Documentation of home visits done by ASHA for the index infant चिह्नित बच्चों के लिए आशा द्वारा किए गए गृह भ्रमण की तालिका<br><ul style="list-style-type: none"> <li>• Tick <math>\checkmark</math> all visit done (किये गए सभी भ्रमण पर सही <math>\checkmark</math> करें)</li> <li>• Cross <math>\times</math> all visit not done (यदि सभी भ्रमण न किये गये तो क्रॉस <math>\times</math> करें)</li> <li>• Write 'NA' if the visits are not scheduled as per age child age (NA लिखें यदि भ्रमण आयु अनुसार सुनिश्चित नहीं हुआ)</li> <li>• HI if infant hospitalized (HI लिखें यदि बच्चा अस्पताल में भर्ती था)</li> <li>• HM if mother hospitalized (HM लिखें यदि माता अस्पताल में भर्ती थीं)</li> </ul> |                       |                       |                         |                         |                         |                         |                                                              |                                                              |
| <b>Day of ASHA visit</b><br>आशा भ्रमण का दिन                                                             | <b>Day 1</b><br>दिन 1                                                                                                                                                                                                                                                                                                                                                                                                                                                                                                                                                                                                                                                                                  | <b>Day 3</b><br>दिन 3 | <b>Day 7</b><br>दिन 7 | <b>Day 14</b><br>दिन 14 | <b>Day 21</b><br>दिन 21 | <b>Day 28</b><br>दिन 28 | <b>Day 42</b><br>दिन 42 | <b>Un-scheduled Visit1</b><br>अनिर्धारित भ्रमण1<br>दिन लिखें | <b>Un-scheduled Visit2</b><br>अनिर्धारित भ्रमण2<br>दिन लिखें |
| 4.10.1. Post natal Examination of mother<br>प्रसव पश्चात माता की जाँच                                    |                                                                                                                                                                                                                                                                                                                                                                                                                                                                                                                                                                                                                                                                                                        |                       |                       |                         |                         |                         |                         |                                                              |                                                              |
| 4.10.2. Examination of newborn<br>नवजात की जाँच                                                          |                                                                                                                                                                                                                                                                                                                                                                                                                                                                                                                                                                                                                                                                                                        |                       |                       |                         |                         |                         |                         |                                                              |                                                              |
| 4.10.3 Weight of Young Infant<br>बच्चों का वजन                                                           |                                                                                                                                                                                                                                                                                                                                                                                                                                                                                                                                                                                                                                                                                                        |                       |                       |                         |                         |                         |                         |                                                              |                                                              |
| 4.10.4 Temperature of Young Infant<br>बच्चों का तापमान                                                   |                                                                                                                                                                                                                                                                                                                                                                                                                                                                                                                                                                                                                                                                                                        |                       |                       |                         |                         |                         |                         |                                                              |                                                              |
| 4.10.5 Verbal enquiry related to young infant health<br>शिशु के स्वास्थ्य सम्बन्धित ली गयी मौखिक जानकारी |                                                                                                                                                                                                                                                                                                                                                                                                                                                                                                                                                                                                                                                                                                        |                       |                       |                         |                         |                         |                         |                                                              |                                                              |
| 4.10.6 Remarks if any: टिप्पणी यदि कोई है                                                                |                                                                                                                                                                                                                                                                                                                                                                                                                                                                                                                                                                                                                                                                                                        |                       |                       |                         |                         |                         |                         |                                                              |                                                              |

यदि कोई भी भ्रमण न हुआ हो तो अनुभाग 5 पर जायें।

|                                                                                                                                      |                                                                                                                                                                                                                                                                                                                                                                                                                                                                                                                                                                                                                                                         |
|--------------------------------------------------------------------------------------------------------------------------------------|---------------------------------------------------------------------------------------------------------------------------------------------------------------------------------------------------------------------------------------------------------------------------------------------------------------------------------------------------------------------------------------------------------------------------------------------------------------------------------------------------------------------------------------------------------------------------------------------------------------------------------------------------------|
| 4.11                                                                                                                                 | Did ASHA wash her hands with soap and water before examining your baby? क्या आपके बच्चों की जाँच के पहले आशा ने अपने हाथों को साबुन और पानी से साफ किया था? Yes <sub>1</sub> /No <sub>2</sub> हाँ <sub>1</sub> /नहीं <sub>2</sub> [ ]                                                                                                                                                                                                                                                                                                                                                                                                                   |
| 4.12                                                                                                                                 | What information did the ASHA give you during her <u>first</u> HBNC Home Visit? प्रथम HBNC गृह भ्रमण के दौरान आशा ने आपको क्या जानकारी दी?                                                                                                                                                                                                                                                                                                                                                                                                                                                                                                              |
| <b>4.12.1 On breast feeding</b><br>(Tick all responses given)<br>स्तनपान के बारे में (दिए गये सभी विकल्पों पर टिक $\checkmark$ करें) | <ul style="list-style-type: none"> <li>• Baby must be only breastfed and no other things should be given such as water, ghutti, honey etc..... [ ]<br/>शिशु को केवल स्तनपान करवाये तथा पानी, घुट्टी, शहद, आदि जैसी कोई और चीजें न दें</li> <li>• Any other thing given may cause diarrhea..... [ ]<br/>किसी अन्य चीज के देने से डायरिया हो सकता है</li> <li>• Other milks such as cow/goat has less iron that may cause anemia..... [ ]<br/>गाय/बकरी जैसे अन्य जानवर के दूध में आयरन कम होता है जिससे अनीमिया हो सकता है</li> <li>• Do not know/ No information given by ASHA..... [ ]<br/>पता नहीं/आशा के द्वारा कोई भी जानकारी नहीं दी गयी</li> </ul> |

|                                                                                                                                                                                            |                                                                                                                                                                                                                                                                                                                                                                                                                                                                                                                                                                                                                                                                       |                                                        |
|--------------------------------------------------------------------------------------------------------------------------------------------------------------------------------------------|-----------------------------------------------------------------------------------------------------------------------------------------------------------------------------------------------------------------------------------------------------------------------------------------------------------------------------------------------------------------------------------------------------------------------------------------------------------------------------------------------------------------------------------------------------------------------------------------------------------------------------------------------------------------------|--------------------------------------------------------|
| <p><b>4.12.2 On infant positioning during breast feeding</b><br/>(Tick all responses given)<br/>स्तनपान के समय शिशु की सही स्थिति के बारे में<br/>(दिए गये सभी विकल्पों पर टिक ✓ करें)</p> | <ul style="list-style-type: none"> <li>• Close to mother's body .....<br/>नवजात को माता के शरीर के नजदीक रखना</li> <li>• Facing Mother with nose opposite to nipple .....<br/>बच्चों का मुँह माता की ओर तथा नाक निप्पल की तरफ लगाये रखें</li> <li>• Hold the infant well supported .....<br/>बच्चों को अच्छे से पकड़कर सहारा देना</li> <li>• Infant head and body in straight line .....<br/>बच्चों का सिर और शरीर एक सीधी रेखा में रहे</li> <li>• Do not know/ No information given by ASHA .....<br/>पता नहीं/आशा द्वारा कोई जानकारी नहीं दी गई</li> </ul>                                                                                                          | <p>[ ]</p> <p>[ ]</p> <p>[ ]</p> <p>[ ]</p> <p>[ ]</p> |
| <p><b>4.12.3 On infant-breast attachment</b><br/>(Tick all responses given)<br/>माँ और बच्चों के स्तनपान के जुड़ाव के बारे में (दिए गये सभी विकल्पों पर टिक ✓ करें)</p>                    | <ul style="list-style-type: none"> <li>• Mother should touch her infant's lip with her nipple.....<br/>माँ को बच्चों के होठ को अपने निप्पल से स्पर्श करवाना चाहिए</li> <li>• Mother should wait until infant's mouth is open .....<br/>माँ बच्चों के मुँह खुलने का इंतजार करे।</li> <li>• Aim the infant's lower lip below the nipple .....<br/>ध्यान रखें नवजात का निचला होठ निप्पल के नीचे रहे।</li> <li>• Do not know/ No information given by ASHA .....<br/>पता नहीं/आशा द्वारा कोई जानकारी नहीं दी गई।</li> </ul>                                                                                                                                               | <p>[ ]</p> <p>[ ]</p> <p>[ ]</p> <p>[ ]</p>            |
| <p><b>4.12.4 On Frequency of breast feeding</b><br/>(Tick one option given)<br/>स्तनपान कितनी-कितनी देर पर कराना चाहिए (दिए गये सभी विकल्पों पर टिक ✓ करें)</p>                            | <ul style="list-style-type: none"> <li>• Every 2 hour .....<br/>प्रति 2 घंटे में</li> <li>• On demand .....<br/>बच्चों की माँग पर</li> <li>• Less than 8 times/day .....<br/>प्रतिदिन 8 बार से कम</li> <li>• More than or equal to 8 times/day .....<br/>प्रतिदिन 8 बार या उससे ज्यादा</li> <li>• Do not know/ No information given by ASHA .....<br/>पता नहीं/आशा द्वारा कोई जानकारी नहीं दी गई।</li> </ul>                                                                                                                                                                                                                                                          | <p>[ ]</p> <p>[ ]</p> <p>[ ]</p> <p>[ ]</p> <p>[ ]</p> |
| <p><b>4.12.5 Timing of first bath</b><br/>(Tick all responses given)<br/>प्रथम स्नान का समय (दिए गये सभी विकल्पों पर टिक ✓ करें)</p>                                                       | <ul style="list-style-type: none"> <li>• Two days after birth जन्म के दो दिन बाद .....</li> <li>• 7 days after birth जन्म के 7 दिन .....</li> <li>• Any other specify .....<br/>अन्य कोई स्पष्ट करें</li> <li>• Do not know/ No information given by ASHA .....<br/>पता नहीं/आशा द्वारा कोई जानकारी नहीं दी गई।</li> </ul>                                                                                                                                                                                                                                                                                                                                            | <p>[ ]</p> <p>[ ]</p> <p>[ ]</p> <p>[ ]</p>            |
| <p><b>4.12.6 On wrapping of baby</b><br/>(Tick all responses given)<br/>बच्चों को लपेटने का तरीका (दिए गये सभी विकल्पों पर टिक ✓ करें)</p>                                                 | <ul style="list-style-type: none"> <li>• The infant be completely covered as per the weather to maintain at optimum temperature .....<br/>बच्चों का सामान्य तापमान बनाए रखने के लिए, मौसम के अनुसार उसे पूरी तरह से लपेट कर रखें।</li> <li>• The infant be covered by cap and socks .....<br/>बच्चों को टोपा एवं मोजा पहनाकर रखें।</li> <li>• The infant should be wrapped by warm cloth .....<br/>बच्चों को गर्म कपड़ों से लपेटकर रखें।</li> <li>• The wrapping and clothes should be changed when wet .....<br/>गीला होने पर कपड़े बदलते रहे।</li> <li>• Do not know/ No information given by ASHA .....<br/>पता नहीं/आशा द्वारा कोई जानकारी नहीं दी गई।</li> </ul> | <p>[ ]</p> <p>[ ]</p> <p>[ ]</p> <p>[ ]</p> <p>[ ]</p> |
| <p><b>4.12.7 Skin to skin contact</b><br/>(Tick one option given)<br/>त्वचा से त्वचा का स्पर्श (दिए गये सभी विकल्पों पर टिक ✓ करें)</p>                                                    | <ul style="list-style-type: none"> <li>• The infant should be kept with skin to skin contact to keep baby warm.....<br/>बच्चों का तापमान बनाये रखने के लिए त्वचा से त्वचा का स्पर्श देते रहे।</li> <li>• Do not know/ No information given by ASHA .....<br/>पता नहीं/आशा द्वारा कोई जानकारी नहीं दी गई।</li> </ul>                                                                                                                                                                                                                                                                                                                                                   | <p>[ ]</p> <p>[ ]</p>                                  |
| <p><b>4.12.8 On cord care</b><br/>(Tick all responses given)<br/>नाल/नाभि की देखभाल (दिए गये सभी विकल्पों पर टिक ✓ करें)</p>                                                               | <ul style="list-style-type: none"> <li>• Nothing should be applied on cord .....<br/>नाभि के ऊपर कोई चीज नहीं लगायें।</li> <li>• Care of the cord should be taken till it dries and falls-off .....<br/>नाभि की देखभाल तब तक करें, जब तक की वह सूखकर झड़ न जायें।</li> <li>• Do not know/ No information given by ASHA .....<br/>पता नहीं/आशा द्वारा कोई जानकारी नहीं दी गई।</li> </ul>                                                                                                                                                                                                                                                                               | <p>[ ]</p> <p>[ ]</p> <p>[ ]</p>                       |

|                                                                                                                                                                                                              |                                                                                                                                                                                                                                                                                                                                                                                                                                                                                                                                                                                                                                                                                                                                                                                                                                                                                                                                                                                                                                                |                                                                                                                                     |
|--------------------------------------------------------------------------------------------------------------------------------------------------------------------------------------------------------------|------------------------------------------------------------------------------------------------------------------------------------------------------------------------------------------------------------------------------------------------------------------------------------------------------------------------------------------------------------------------------------------------------------------------------------------------------------------------------------------------------------------------------------------------------------------------------------------------------------------------------------------------------------------------------------------------------------------------------------------------------------------------------------------------------------------------------------------------------------------------------------------------------------------------------------------------------------------------------------------------------------------------------------------------|-------------------------------------------------------------------------------------------------------------------------------------|
| <p><b>4.12.9 On eye care</b><br/>(Tick all responses given)<br/>आंखों की देखभाल के लिए (दिए गये सभी विकल्पों पर टिक ✓ करें)</p>                                                                              | <ul style="list-style-type: none"> <li>• No 'kajal' or any other home remedies be applied on the eyes .....<br/>आंखों पर काजल या घरेलू चीजें न लगायें।</li> <li>• If any infection or 'pus' discharge is seen then contact to ANM/Asha and seek for adequate medication .....<br/>किसी भी प्रकार के संक्रमण एवं पस के रिसाव के देखे जाने पर ए0एन0एम0/आशा से सम्पर्क करें एवं उचित उपचार करवायें।</li> <li>• Do not know/ No information given by ASHA .....<br/>पता नहीं/आशा द्वारा कोई जानकारी नहीं दी गई।</li> </ul>                                                                                                                                                                                                                                                                                                                                                                                                                                                                                                                         | <p>[ ]</p> <p>[ ]</p> <p>[ ]</p>                                                                                                    |
| <p><b>4.12.10 Immunization</b><br/>(Tick all responses given)<br/>टीकाकरण (दिए गये सभी विकल्पों पर टिक ✓ करें)</p>                                                                                           | <ul style="list-style-type: none"> <li>• Regular immunization details would be provided from the time to time for immunization as per the program of the village .....<br/>गाँव के कार्यक्रम में अनुसार समय-समय पर नियमित टीकाकरण की जानकारी दी।</li> <li>• Immunization would be done by the ANM at a particular place or time.....<br/>टीकाकरण ए0एन0एम0 द्वारा निर्धारित स्थान एवं समय पर किया जायेगा।</li> <li>• Do not know/ No information given by ASHA .....<br/>पता नहीं/आशा द्वारा कोई जानकारी नहीं दी गई।</li> </ul>                                                                                                                                                                                                                                                                                                                                                                                                                                                                                                                 | <p>[ ]</p> <p>[ ]</p> <p>[ ]</p>                                                                                                    |
| <p><b>4.12.11 Hand washing</b><br/>(Tick all responses given)<br/>हाथ धोने की विधि(दिए गये सभी विकल्पों पर टिक ✓ करें)</p>                                                                                   | <ul style="list-style-type: none"> <li>• The Infant should be touched only after washing the hands with soap by anybody<br/>किसी को भी बच्चों को स्पर्श करने से पहले हाथों को साबुन से अच्छे से साफ करना चाहिए।</li> <li>• Avoid touching of the infant by any sick person<br/>किसी भी बीमार व्यक्ति को बच्चों का स्पर्श नहीं करना चाहिए।</li> <li>• Do not know/ No information given by ASHA<br/>पता नहीं/आशा द्वारा कोई जानकारी नहीं दी गई।</li> </ul>                                                                                                                                                                                                                                                                                                                                                                                                                                                                                                                                                                                      | <p>[ ]</p> <p>[ ]</p> <p>[ ]</p>                                                                                                    |
| <p><b>4.12.12 Danger sign in newborn</b> नवजात शिशु में खतरों के लक्षण<br/>(दिए गये सभी विकल्पों पर टिक ✓ करें)</p>                                                                                          | <ul style="list-style-type: none"> <li>• Not able to feed since birth/stopped feeding well or not feeding at all जन्म से स्तनपान नहीं कर पा रहा। आज की तारीख में पहले की अपेक्षा में स्तनपान कम कर दिया/बिल्कुल भी स्तनपान न करना</li> <li>• Convulsions/ seizures ऐंटना/आना .....</li> <li>• Lower Chest Movements (severe chest indrawing) पसली चलना/सीना धंसना .....</li> <li>• Hot to touch छूने पर गर्म महसूस होना .....</li> <li>• Feels cold to touch छूने पर ठंडा महसूस होना .....</li> <li>• Movement only when stimulated सिर्फ छूने पर बच्चों का हिलना-डुलना .....</li> <li>• Fast Breathing (breaths 60/minute of more) तेज-तेज साँसें चलना .....</li> <li>• Jaundice पीलिया .....</li> <li>• Diarrhea डायरिया/दस्त होना (पतली टट्टी आना) .....</li> <li>• Pustules (10 or more) or one large focus of infection .....<br/>10 या ज्यादा पस के दाने या एक बड़ा फोड़ा</li> <li>• Grunting कराहना/संक्रमण .....</li> <li>• Do not know/ No information given by ASHA .....<br/>पता नहीं/आशा द्वारा कोई जानकारी नहीं दी गई।</li> </ul> | <p>[ ]</p> |
| <p><b>4.12.13 What to do in case of identification of danger sign in newborn (in verbatim)</b> शिशु में गम्भीर बीमारी के लक्षण पाने पर क्या करना चाहिए, के लिए आशा द्वारा किया गया विवरण। (शब्दशः लिखें)</p> | <p><b>Translate to English (for office)</b></p>                                                                                                                                                                                                                                                                                                                                                                                                                                                                                                                                                                                                                                                                                                                                                                                                                                                                                                                                                                                                |                                                                                                                                     |

**Section 5: Breast Feeding Practices****भाग- 5 स्तनपान कराने का अभ्यास**

|     |                                                                                                                                                                                   |                                                                                                                                                                                                                                                                                                                |     |
|-----|-----------------------------------------------------------------------------------------------------------------------------------------------------------------------------------|----------------------------------------------------------------------------------------------------------------------------------------------------------------------------------------------------------------------------------------------------------------------------------------------------------------|-----|
| 5.1 | How soon after the birth you breastfed the baby? जन्म के कितने समय पश्चात आपने शिशु को स्तनपान कराया?                                                                             | Less than 1 hour <sub>1</sub> / 1-4 hours <sub>2</sub> / 4- 24 hours <sub>3</sub> / >24 hours <sub>4</sub> / Never <sub>5</sub><br>एक घंटे से कम <sub>1</sub> /1-4 घंटे <sub>2</sub> /4-24 घंटे <sub>3</sub> />24 घंटे <sub>4</sub> /कभी नहीं <sub>5</sub>                                                     | [ ] |
| 5.2 | If never breastfed than why? यदि कभी स्तनपान नहीं कराया तो क्यों? विवरण लिखें।<br>Note verbatim                                                                                   | -----<br>-----<br>-----<br><b>(English Translation)</b><br>-----<br>-----<br>-----                                                                                                                                                                                                                             |     |
| 5.3 | Did you give anything other than breast milk immediately after birth? जन्म के तुरन्त बाद क्या आपने शिशु को माँ के दूध के अतिरिक्त कुछ और दिया?                                    | Not given <sub>1</sub> / Honey or `ghutti` or jaggery <sub>2</sub> / Water <sub>3</sub> / Any other <sub>4</sub> (specify) _____<br>नहीं दिया <sub>1</sub> /शहद या घुट्टी या गुड़/पानी <sub>3</sub> /अन्य <sub>4</sub> उल्लेख करें.....                                                                        | [ ] |
| 5.4 | Did you give the baby the first milk? क्या आपने शिशु को अपना पहला पीला गाढ़ा दूध पिलाया?                                                                                          | Yes <sub>1</sub> हाँ <sub>1</sub> ( go to Q. 5.6)<br>No <sub>2</sub> नहीं <sub>2</sub>                                                                                                                                                                                                                         | [ ] |
| 5.5 | If NO, give reasons for it यदि नहीं, इसका कारण बतायें।                                                                                                                            | It is unsafe <sub>1</sub> / Due to social customs <sub>2</sub> / Advised to discard it <sub>3</sub> /Others <sub>4</sub> (specify) .....<br>यह असुरक्षित है <sub>1</sub> /सामाजिक रीति-रिवाज के कारण <sub>2</sub> /इसको फेंकने की सलाह दी गयी <sub>3</sub> / अन्य <sub>4</sub> उल्लेख करें.....                | [ ] |
| 5.6 | How frequently did you breastfeed your baby? कितने समय के अन्तराल पर आप अपने बच्चों को दूध पिलाती है?                                                                             | On demand <sub>1</sub> /Every 2 hours <sub>2</sub> / Less than 8 times per day <sub>3</sub> /More than or equal to 8 times per day <sub>4</sub><br>बच्चों की माग पर <sub>1</sub> / प्रति दो घंटे पर <sub>2</sub> /प्रतिदिन 8 बार से कम <sub>3</sub> /प्रति दिन 8 बार या उससे अधिक <sub>4</sub>                 | [ ] |
| 5.7 | Is the baby exclusively breastfed (not even water)? क्या आपने बच्चों को सिर्फ स्तनपान ही कराया? (पानी भी नहीं)                                                                    | Yes <sub>1</sub> हाँ <sub>1</sub><br>No <sub>2</sub> नहीं <sub>2</sub>                                                                                                                                                                                                                                         | [ ] |
| 5.8 | If baby is not being breastfed, then which method you are using to feed the baby? यदि बच्चों ने स्तनपान नहीं किया, तब बच्चे को आहार देने हेतु आप कौन सी विधि का प्रयोग कर रही है। | Spoon feeding <sub>1</sub> / Bottle feeding <sub>2</sub> /Others <sub>3</sub> specify _____/<br>Not applicable (as baby only breastfed) <sub>4</sub><br>चम्मच द्वारा <sub>1</sub> /बोतल द्वारा <sub>2</sub> /अन्य कोई <sub>3</sub> उल्लेख करें.....<br>/लागू नहीं (बच्चा केवल स्तनपान ही करता है) <sub>4</sub> | [ ] |
| 5.9 | What is the frequency of urination of baby? बच्चा कितने-कितने अन्तराल पर पेशाब करता है।                                                                                           | After every feed <sub>1</sub> / 1 – 4 times per day <sub>2</sub> / 5 – 10 times per day <sub>3</sub> /Other <sub>4</sub><br>Specify _____<br>प्रत्येक आहार के बाद <sub>1</sub> /प्रतिदिन 1-4 बार <sub>2</sub> /प्रतिदिन 5-10 बार <sub>3</sub> / अन्य कोई <sub>4</sub> उल्लेख करें.....                         | [ ] |

**Section 6: Experience of Serious Illness in Young Infants****भाग-6 चिन्हित नवजात शिशु में गंभीर बीमारी की पहचान**

|        |                                                                                                                             |                                                                                                                 |             |
|--------|-----------------------------------------------------------------------------------------------------------------------------|-----------------------------------------------------------------------------------------------------------------|-------------|
| 6.1    | Did your baby have any serious illness till date after birth? क्या आपके बच्चों को जन्म से लेकर अभी तक कोई गंभीर बीमारी हुई? | Yes <sub>1</sub> हाँ <sub>1</sub><br>No <sub>2</sub> नहीं <sub>2</sub> (end interview) साक्षात्कार समाप्त करें। | [ ]         |
| 6.2    | If yes, then on what day of life यदि हाँ, जन्म के कितने दिन बाद                                                             |                                                                                                                 | Day [ ][ ]  |
| 6.2.1* | Was the illness in the previous two weeks? क्या बीमारी पिछले दो हफ्तों में हुई थी                                           | If yes, fill section 7                                                                                          | [ ]         |
| 6.3    | What was total duration of illness? बीमारी की कुल अवधि क्या थी?                                                             |                                                                                                                 | Days [ ][ ] |





|       |
|-------|
| ..... |
| ..... |
| ..... |

6.7 **1<sup>st</sup> Person/Place of treatment** प्रथम व्यक्ति/स्थान जहां से उपचार लिया गया है

6.7.1 Person Consulted\*: किस व्यक्ति से सलाह ली गयी? (परामर्शदाता) [ ]

6.7.2 What did the consulted person do: Gave Treatment<sub>1</sub>(go to 6.7.4.)/Referred<sub>2</sub> (go to 6.7.3) [ ]  
सलाह देने वाले व्यक्ति ने क्या किया उपचार किया<sub>1</sub>(कृपया प्रश्न 6.7.4 पर जाये)/संदर्भित किया<sub>2</sub> (कृपया प्रश्न 6.7.3 पर जाये)

| 6.7.3 Details of Referral                                                                         | 6.7.4 Details of Treatment                                                                                                                                                                                                                                                                                                                                                                                                                                   |
|---------------------------------------------------------------------------------------------------|--------------------------------------------------------------------------------------------------------------------------------------------------------------------------------------------------------------------------------------------------------------------------------------------------------------------------------------------------------------------------------------------------------------------------------------------------------------|
| (a) Type of referred facility**:<br>संदर्भित केन्द्र का प्रकार [ ]                                | (a) Place where treatment was given**:<br>उपचार का स्थान [ ]                                                                                                                                                                                                                                                                                                                                                                                                 |
| (b) write name of the health facility<br>also<br>संदर्भित केन्द्र का नाम भी दें<br>.....<br>..... | (b) Treatment type: Inpatient <sub>1</sub> / Outpatient <sub>2</sub> /Not applicable <sub>3</sub> [ ]<br>उपचार का तरीका: अन्तः रोगी <sub>1</sub> /बाह्य रोगी <sub>2</sub> /लागू नहीं <sub>3</sub>                                                                                                                                                                                                                                                            |
|                                                                                                   | (c) Give the details of the treatment: उपचार का पूर्ण विवरण दें।<br>(also write diagnosis as on discharge ticket in case of inpatient admission)<br>(अन्तः रोगी डिस्चार्ज टिकट पर लिखी गयी बीमारी भी लिखें)<br>.....<br>.....<br>.....                                                                                                                                                                                                                       |
|                                                                                                   | (d) Total duration of treatment at this place: उपचार की अवधि days [ ][ ]                                                                                                                                                                                                                                                                                                                                                                                     |
|                                                                                                   | (e) Outcome of treatment: उपचार का परिणाम [ ]<br>Completely cured <sub>1</sub> (If cured, go to Q. 6.10) /Not cured <sub>2</sub> / Died <sub>3</sub> (go to Q. 6.10)/<br>Treatment continues till date <sub>4</sub> (go to Q. 6.10)<br>पूर्ण रूप से स्वस्थ हुआ <sub>1</sub> (यदि स्वस्थ हुआ तो प्रश्न 6.10 पर जाये)/स्वस्थ नहीं हुआ <sub>2</sub> /मृत्यु हो गयी <sub>3</sub> (प्रश्न 6.10 पर जाये)/अभी तक उपचार चल रहा है <sub>4</sub> (प्रश्न 6.10 पर जाये) |

6.8 **2<sup>nd</sup> Person/Place of treatment** दूसरा व्यक्ति/स्थान जहां से उपचार लिया गया है।

6.8.1 Person Consulted\*: किस व्यक्ति से सलाह ली गयी? (परामर्शदाता) [ ]

6.8.2 What did the consulted person do: Gave Treatment<sub>1</sub>(give to 6.8.4. /Referred<sub>2</sub> (go to 6.8.3) [ ]  
सलाह देने वाले व्यक्ति ने क्या किया उपचार किया<sub>1</sub>/संदर्भित किया

| 6.8.3 Details of Referral                                                                      | 6.8.4 Details of Treatment                                                                                                                                                                                                                                                                                                                                                                                                                                       |
|------------------------------------------------------------------------------------------------|------------------------------------------------------------------------------------------------------------------------------------------------------------------------------------------------------------------------------------------------------------------------------------------------------------------------------------------------------------------------------------------------------------------------------------------------------------------|
| (a) Type of referred facility**:<br>संदर्भित केन्द्र का प्रकार [ ]                             | (a) Place where treatment was given**:<br>उपचार का स्थान [ ]                                                                                                                                                                                                                                                                                                                                                                                                     |
| (b) write name of the health facility<br>also संदर्भित केन्द्र का नाम भी दें<br>.....<br>..... | (b) Treatment type: Inpatient <sub>1</sub> / Outpatient <sub>2</sub> /Not applicable <sub>3</sub> [ ]<br>उपचार का तरीका: अन्तः रोगी <sub>1</sub> /बाह्य रोगी <sub>2</sub> /लागू नहीं <sub>3</sub>                                                                                                                                                                                                                                                                |
|                                                                                                | (c) Give the details of the treatment: उपचार का पूर्ण विवरण दें।<br>(also write diagnosis as on discharge ticket in case of inpatient admission)<br>(अन्तः रोगी डिस्चार्ज टिकट पर लिखी गयी बीमारी भी लिखें)<br>.....<br>.....<br>.....                                                                                                                                                                                                                           |
|                                                                                                | (d) Total duration of treatment at this place: उपचार की अवधि days [ ][ ]                                                                                                                                                                                                                                                                                                                                                                                         |
|                                                                                                | (e) Outcome of treatment: उपचार का परिणाम [ ]<br>Completely cured <sub>1</sub> (If cured, go to Q. 6.10) /Not cured <sub>2</sub> / Died <sub>3</sub> (move to Q. 6.10)/<br>Treatment continues till date <sub>4</sub> (move to Q. 6.10)<br>पूर्ण रूप से स्वस्थ हुआ <sub>1</sub> (यदि स्वस्थ हुआ तो प्रश्न 6.10 पर जाये)/स्वस्थ नहीं हुआ <sub>2</sub> /मृत्यु हो गयी <sub>3</sub> (प्रश्न 6.10 पर जाये)/अभी तक उपचार चल रहा है <sub>4</sub> (प्रश्न 6.10 पर जाये) |

|                                                                                                                                                                                                                              |                                                                                                                                                                                                                                                                                                                                                                                                                                                               |
|------------------------------------------------------------------------------------------------------------------------------------------------------------------------------------------------------------------------------|---------------------------------------------------------------------------------------------------------------------------------------------------------------------------------------------------------------------------------------------------------------------------------------------------------------------------------------------------------------------------------------------------------------------------------------------------------------|
| <b>6.9 3<sup>rd</sup> Person/Place of treatment</b> तृतीय व्यक्ति/स्थान जहां से उपचार लिया गया है                                                                                                                            |                                                                                                                                                                                                                                                                                                                                                                                                                                                               |
| 6.9.1 Person Consulted*: किस व्यक्ति से सलाह ली गयी? (परामर्शदाता)                                                                                                                                                           | [ ]                                                                                                                                                                                                                                                                                                                                                                                                                                                           |
| 6.9.2 What did the consulted person do: Gave Treatment <sub>1</sub> (give to 6.9.4 <sub>1</sub> /Referred <sub>2</sub> (go to 6.9.3) सलाह देने वाले व्यक्ति ने क्या किया उपचार किया <sub>1</sub> /संदर्भित किया <sub>2</sub> | [ ]                                                                                                                                                                                                                                                                                                                                                                                                                                                           |
| <b>6.9.3 Details of Referral</b>                                                                                                                                                                                             | <b>6.9.4 Details of Treatment</b>                                                                                                                                                                                                                                                                                                                                                                                                                             |
| Give details of the referred facility**:<br>संदर्भित केन्द्र का पूर्ण विवरण दें। [ ]<br>write name of the health facility also<br>संदर्भित केन्द्र का नाम भी दें<br>.....<br>.....                                           | (a) Place where treatment was given***: उपचार का स्थान [ ]                                                                                                                                                                                                                                                                                                                                                                                                    |
|                                                                                                                                                                                                                              | (b) Treatment type: Inpatient <sub>1</sub> / Outpatient <sub>2</sub> /Not applicable <sub>3</sub><br>उपचार का तरीका: अन्तः रोगी <sub>1</sub> /बाह्य रोगी <sub>2</sub> /लागू नहीं <sub>3</sub> [ ]                                                                                                                                                                                                                                                             |
|                                                                                                                                                                                                                              | (c) Give the details of the treatment: उपचार का पूर्ण विवरण दें।<br>(also write diagnosis as on discharge ticket in case of inpatient admission) (अन्तः रोगी डिस्चार्ज टिकट पर लिखी गयी बीमारी भी लिखें)<br>.....<br>.....                                                                                                                                                                                                                                    |
|                                                                                                                                                                                                                              | (d) Total duration of treatment at this place: <b>days</b> [ ][ ]<br>इस स्थान पर उपचार की कुल अवधि: (दिनों में)                                                                                                                                                                                                                                                                                                                                               |
|                                                                                                                                                                                                                              | (e) Outcome of treatment: उपचार का परिणाम [ ]<br>Completely cured <sub>1</sub> (If cured, go to Q. 6.10) /Not cured <sub>2</sub> / Died <sub>3</sub> (move to Q. 6.10)/ Treatment continues till date <sub>4</sub> (move to Q. 6.10)<br>पूर्ण रूप से स्वस्थ हुआ <sub>1</sub> (यदि स्वस्थ हुआ तो प्रश्न 6.10 पर जाये)/स्वस्थ नहीं हुआ <sub>2</sub> /मृत्यु हो गयी <sub>3</sub> (प्रश्न 6.10 पर जाये)/अभी तक उपचार चल रहा है <sub>4</sub> (प्रश्न 6.10 पर जाये) |
| 6.10 Total Duration of treatment (indays) उपचार की कुल समयावधि (दिनों में)                                                                                                                                                   | [ ][ ][ ]                                                                                                                                                                                                                                                                                                                                                                                                                                                     |
| 6.11 Total approximate out of pocket money spent on treatment (INR) उपचार में कुल खर्च हुई अनुमानित धनराशि                                                                                                                   | [ ][ ][ ][ ][ ]                                                                                                                                                                                                                                                                                                                                                                                                                                               |
| 6.12 Did you use transport service to seek care for sick young infant? क्या आपने बीमार शिशु के उपचार हेतु परिवहन सुविधाओं का उपयोग किया?                                                                                     | Yes <sub>1</sub> हाँ [ ]<br>No <sub>2</sub> नहीं <sub>2</sub> (end interview) (साक्षात्कार समाप्त) [ ]                                                                                                                                                                                                                                                                                                                                                        |
| 6.13 Which transport did you use to seek helath care for sick infant? आपने अपने शिशु की स्वास्थ्य देखभाल के लिए कौन से वाहन का इस्तेमाल किया?                                                                                | Ambulance service 102 <sub>1</sub> / Ambulance service 108 <sub>2</sub> /Personal Vehicle <sub>3</sub> /<br>Private vehicle-Village <sub>4</sub> /Paid Vehicle/Taxi <sub>5</sub><br>एम्बुलेंस सुविधा 102 <sub>1</sub> /एम्बुलेंस सुविधा 108 <sub>2</sub> /व्यक्तिगत वाहन <sub>3</sub> /<br>गाँव का व्यक्तिगत वाहन <sub>4</sub> / खर्च पर वाहन/टैक्सी <sub>5</sub> [ ]                                                                                         |

|                                                                                                                                                                                                                                                       |                                                                                                                                                                                                                                                                                                                                                                                                                    |
|-------------------------------------------------------------------------------------------------------------------------------------------------------------------------------------------------------------------------------------------------------|--------------------------------------------------------------------------------------------------------------------------------------------------------------------------------------------------------------------------------------------------------------------------------------------------------------------------------------------------------------------------------------------------------------------|
| <b>Person consulted *</b><br>सलाह देने वाला व्यक्ति (परामर्शदाता)                                                                                                                                                                                     | <b>Place of treatment **/Referred Facility**</b><br>चिकित्सा का स्थान/संदर्भित केन्द्र                                                                                                                                                                                                                                                                                                                             |
| ASHA <sub>1</sub> /ANM <sub>2</sub> / AWW <sub>3</sub> /Private Doctor <sub>4</sub> /Village Based Doctor <sub>5</sub> /Faith Healer <sub>6</sub> / government doctor <sub>7</sub> /Self <sub>8</sub> /Any other <sub>9</sub> specify .....           | Home <sub>1</sub> /PHC <sub>2</sub> /CHC <sub>3</sub> /District Hospital <sub>4</sub> /<br>Medical College <sub>5</sub> /Private Hospital <sub>6</sub> /Home & Hospitalboth <sub>7</sub> घर <sub>1</sub> /प्राथमिक स्वास्थ्य केन्द्र <sub>2</sub> /सामुदायिक स्वास्थ्य केन्द्र <sub>3</sub> /जिला चिकित्सालय <sub>4</sub> /मेडिकल कालेज <sub>5</sub> /निजी अस्पताल <sub>6</sub> /घर एवं अस्पताल दोनों <sub>7</sub> |
| आशा <sub>1</sub> /एनएनएएम <sub>2</sub> /आंगनवाडी कार्यकर्त्री <sub>3</sub> /निजी चिकित्सक <sub>4</sub> /गाँव का चिकित्सक <sub>5</sub> /झाड़-फूक करने वाला <sub>6</sub> /सरकारी चिकित्सक <sub>7</sub> /स्वयं द्वारा <sub>8</sub> /अन्य स्पष्ट करें, .. |                                                                                                                                                                                                                                                                                                                                                                                                                    |

## Section 7\*: To be filled if response to question 6.2.1 is yes अगर 6.2.1 का जवाब हाँ हैं तो भरें

|       |                                                                                                                                                                                                                                                                                                                                                                                                                           |                                                                                                                                                                                                        |
|-------|---------------------------------------------------------------------------------------------------------------------------------------------------------------------------------------------------------------------------------------------------------------------------------------------------------------------------------------------------------------------------------------------------------------------------|--------------------------------------------------------------------------------------------------------------------------------------------------------------------------------------------------------|
| 7.1.  | <i>How much did you spend in the treatment of this episode (in Rs). Fill only those boxes that are applicable with amount spent. Fill 0000 in others. [Prompt for each]</i><br><i>आपने इस बीमारी के ईलाज के लिए कितना पैसा खर्चा</i>                                                                                                                                                                                      |                                                                                                                                                                                                        |
| 7.2.  | <i>Consultation (the fees paid to the source of care).....</i><br><i>परामर्श का कितना शुल्क देना पड़ा</i>                                                                                                                                                                                                                                                                                                                 | <input type="text"/> <input type="text"/> <input type="text"/> <input type="text"/>                                                                                                                    |
| 7.3.  | <i>Dispensing (include costs of medicines dispensed by the source).....</i><br><i>ईलाज करने की जगह पे दी हुई दवाइयों का खर्चा</i>                                                                                                                                                                                                                                                                                         | <input type="text"/> <input type="text"/> <input type="text"/> <input type="text"/>                                                                                                                    |
| 7.4.  | <i>Purchase of drugs (cost incurred to purchase drugs from the chemist or other source).....</i><br><i>दवाइयां खरीदने का कितना खर्चा हुआ</i>                                                                                                                                                                                                                                                                              | <input type="text"/> <input type="text"/> <input type="text"/> <input type="text"/>                                                                                                                    |
| 7.5.  | <i>Special food purchased (fruits, juice etc.).....</i><br><i>कोई खास खाना खरीदा</i>                                                                                                                                                                                                                                                                                                                                      | <input type="text"/> <input type="text"/> <input type="text"/> <input type="text"/>                                                                                                                    |
| 7.6.  | <i>Transportation (round trip cost paid for taking to the source of care).....</i><br><i>आने जाने का कितना खर्चा हुआ</i>                                                                                                                                                                                                                                                                                                  | <input type="text"/> <input type="text"/> <input type="text"/> <input type="text"/>                                                                                                                    |
| 7.7.  | <i>Admission/hospitalization cost.....</i><br><i>हॉस्पिटल में भर्ती होने का खर्च</i>                                                                                                                                                                                                                                                                                                                                      | <input type="text"/> <input type="text"/> <input type="text"/> <input type="text"/>                                                                                                                    |
| 7.8.  | <i>Did you (or spouse) take time off from work due to this illness</i><br><i>.....</i><br><i>क्या आपने (या आपके पति) ने काम से समय लिया इस बीमारी की वजह से</i>                                                                                                                                                                                                                                                           | <input type="checkbox"/>                                                                                                                                                                               |
| 7.9.  | <i>If yes, how much wages did you lose because of this absence from work.....</i><br><i>अगर हाँ, तोह आपने कितनी बगार खोई, काम पे न जाके</i>                                                                                                                                                                                                                                                                               | <input type="text"/> <input type="text"/> <input type="text"/> <input type="text"/>                                                                                                                    |
| 7.10. | <i>Did you or other family members have to stay at a place away from home.....</i><br><i>क्या आपको या परिवार वालों को कहीं घर से दूर रहना पड़ा</i><br><i>If yes, how much did you have to pay for the stay.....</i><br><i>अगर हाँ, तोह आपको कितने पैसे देने पड़े</i><br><i>How much did you have to spend on food and other other expenses during this stay.....</i><br><i>आपका खाने या अन्य चीजों पे कितना खर्चा हुआ</i> | <input type="checkbox"/><br><input type="text"/> <input type="text"/> <input type="text"/> <input type="text"/><br><input type="text"/> <input type="text"/> <input type="text"/> <input type="text"/> |
| 7.11. | <i>Other costs, specify.....</i><br><i>कोई और खर्च</i>                                                                                                                                                                                                                                                                                                                                                                    | <input type="text"/> <input type="text"/> <input type="text"/> <input type="text"/>                                                                                                                    |

| Interview Details |                                                                                                                           |
|-------------------|---------------------------------------------------------------------------------------------------------------------------|
| 1.                | <b>Interviewer Name</b><br>साक्षात्कारकर्ता का नाम<br>.....<br>(Name in capital letters) नाम अंग्रेजी के बड़े अक्षरों में |
| 2.                | <b>Signature Interviewer</b><br>साक्षात्कारकर्ता का हस्ताक्षर                                                             |
| 3.                | <b>Date of interview</b><br>साक्षात्कार की तिथि<br>[ ][ ]/[ ][ ]/[ ][ ]<br>dd mm yyyy<br>दिन माह वर्ष                     |
| 4.                | <b>Supervisor Name</b> पर्यवेक्षक का नाम<br>.....<br>(Name in capital letters) नाम अंग्रेजी के बड़े अक्षरों में           |
| 5.                | <b>Signature of Supervisor</b> पर्यवेक्षक का हस्ताक्षर                                                                    |
| 6.                | <b>Date of validation:</b><br>[ ][ ]/[ ][ ]/[ ][ ]<br>dd mm yyyy<br>दिन माह वर्ष                                          |
| 7.                | <b>Data Entry Operator:</b><br>[ ][ ] (Initial of name only) केवल नाम का प्रथम अक्षर                                      |
| 8.                | <b>Signature Data entry operator</b><br>डाटा एन्ट्री आपरेटर का हस्ताक्षर                                                  |
| 9.                | <b>Date of Data Entry</b><br>डाटा एन्ट्री की तिथि<br>[ ][ ]/[ ][ ]/[ ][ ][ ]<br>dd mm yyyy<br>दिन माह वर्ष                |

**Annexure****Section 8:****8.1: List all live births (Chronologically)**

सभी जीवित जन्मों की सूची (कालानुक्रमिक)

| Child number<br>बच्चे का क्रम | When was the child born (year)<br>बच्चे का जन्म कब हुआ (साल में) | Place of delivery(Home <sup>1</sup> / Private Institution <sup>2</sup> /Govt Institution <sup>3</sup> /Transit <sup>4</sup> )<br>प्रसव का स्थान (घर <sup>1</sup> / निजी संस्थान <sup>2</sup> /सरकारी संस्थान <sup>3</sup> / रास्ते में <sup>4</sup> ) | Immunization Status (Fully Immunized for age <sup>1</sup> /Not Immunized <sup>2</sup> )<br>टीकाकरण स्थिति (पूरी तरह से उम्र के लिए प्रतिरक्षित <sup>1</sup> / प्रतिरक्षित नहीं <sup>2</sup> ) | Living on day of interview (Yes/No)<br>बच्चा साक्षात्कार के दिन जीवित है (हां/नहीं) | Age (today/at death) If less than 1 year then please specify the age in months<br>आयु (आज / मृत्यु पर) यदि 1 वर्ष से कम हो तो कृपया महीनों में उम्र लिखें | If dead, Place of death (Home <sup>1</sup> / Private Institution <sup>2</sup> / Govt. Institution <sup>3</sup> /Transit <sup>4</sup> )<br>अगर मृत, मृत्यु का स्थान (घर <sup>1</sup> / निजी संस्थान/ सरकारी संस्थान <sup>2</sup> / रास्ते में <sup>3</sup> ) | If dead, Cause of death if known<br>अगर मृत, मृत्यु का कारण | If died following an illness, after how many days<br>यदि बीमारी के बाद मृत्यु हो गई है, तो कितने दिन बाद |
|-------------------------------|------------------------------------------------------------------|-------------------------------------------------------------------------------------------------------------------------------------------------------------------------------------------------------------------------------------------------------|-----------------------------------------------------------------------------------------------------------------------------------------------------------------------------------------------|-------------------------------------------------------------------------------------|-----------------------------------------------------------------------------------------------------------------------------------------------------------|-------------------------------------------------------------------------------------------------------------------------------------------------------------------------------------------------------------------------------------------------------------|-------------------------------------------------------------|----------------------------------------------------------------------------------------------------------|
| 1                             |                                                                  |                                                                                                                                                                                                                                                       |                                                                                                                                                                                               |                                                                                     |                                                                                                                                                           |                                                                                                                                                                                                                                                             |                                                             |                                                                                                          |
| 2                             |                                                                  |                                                                                                                                                                                                                                                       |                                                                                                                                                                                               |                                                                                     |                                                                                                                                                           |                                                                                                                                                                                                                                                             |                                                             |                                                                                                          |
| 3                             |                                                                  |                                                                                                                                                                                                                                                       |                                                                                                                                                                                               |                                                                                     |                                                                                                                                                           |                                                                                                                                                                                                                                                             |                                                             |                                                                                                          |
| 4                             |                                                                  |                                                                                                                                                                                                                                                       |                                                                                                                                                                                               |                                                                                     |                                                                                                                                                           |                                                                                                                                                                                                                                                             |                                                             |                                                                                                          |
| 5                             |                                                                  |                                                                                                                                                                                                                                                       |                                                                                                                                                                                               |                                                                                     |                                                                                                                                                           |                                                                                                                                                                                                                                                             |                                                             |                                                                                                          |
