# Supplementary material for: Management of possible serious bacterial infection in young infants closer to home when referral is not feasible: Lessons from implementation research in Himachal Pradesh, India
Source: PubMed Central journal article supplement (PMC7755274; doi:10.1371/journal.pone.0243724), 2020-12-22
Supplement: pone.0243724.s012.pdf [file pone.0243724.s012.pdf]

|       |                                    |                                                                                                                                                                                                                                                                                                                                                                                                                             |               |
|-------|------------------------------------|-----------------------------------------------------------------------------------------------------------------------------------------------------------------------------------------------------------------------------------------------------------------------------------------------------------------------------------------------------------------------------------------------------------------------------|---------------|
| 3.7.1 | <i>If working outside home:</i>    | <i>Number of hours spent away from home.</i>                                                                                                                                                                                                                                                                                                                                                                                | [ ]           |
| 3.8   | Age of Father (in completed years) |                                                                                                                                                                                                                                                                                                                                                                                                                             | [ ] [ ] years |
| 3.9   | Education of Father (completed)    | Illiterate <sub>1</sub> / Primary level <sub>2</sub> / Middle school <sub>3</sub> / Highschool <sub>4</sub> / Intermediate <sub>5</sub> / Graduate <sub>6</sub> / Postgraduate <sub>7</sub> / Professional <sub>8</sub><br>अशिक्षित <sub>1</sub> / प्राथमिक <sub>2</sub> / माध्यमिक <sub>3</sub> / हाईस्कूल <sub>4</sub> / इण्टरमीडिएट <sub>5</sub> / स्नातक <sub>6</sub> / परास्नातक <sub>7</sub> / व्यवसायिक <sub>8</sub> | [ ]           |
| 3.10  | Occupation of Father               | Unemployed <sub>1</sub> / Un-skilled worker <sub>2</sub> / Skilled worker <sub>3</sub> / Farmer <sub>4</sub> / Shop owner <sub>5</sub> / Clerical <sub>6</sub> / Professional <sub>7</sub><br>बेरोजगार <sub>1</sub> / अकुशल कारीगर <sub>2</sub> / कुशल कारीगर <sub>3</sub> / किसान <sub>4</sub> / दुकानदार <sub>5</sub> / लिपिक <sub>6</sub> / व्यवसायिक <sub>7</sub>                                                       | [ ]           |
| 3.11  | Age of index child (< 1 year)      |                                                                                                                                                                                                                                                                                                                                                                                                                             | Days [ ] [ ]  |
| 3.12  | Gender                             | Male <sub>1</sub> / Female <sub>2</sub>                                                                                                                                                                                                                                                                                                                                                                                     | [ ]           |
| 3.13  | Number of Living Sibling           |                                                                                                                                                                                                                                                                                                                                                                                                                             | [ ] [ ]       |
| 3.14  | Birth order                        |                                                                                                                                                                                                                                                                                                                                                                                                                             | [ ] [ ]       |

**Section 4: In-depth Interview** गहन साक्षात्कार**Q.1 Can you tell what are the symptoms of serious illness in young infants?**

क्या आप बता सकते हैं शिशुओं में गम्भीर बीमारी के लक्षण क्या हैं?

| Probe<br>पूछें                                                                                                            | Write verbatim<br>कथन को लिखें | (Coding)<br>(For office use only)<br>कोड (आफिस कार्य हेत) |
|---------------------------------------------------------------------------------------------------------------------------|--------------------------------|-----------------------------------------------------------|
| a. Feeding related symptoms<br>आहार सम्बंधी लक्षण                                                                         |                                |                                                           |
| b. Body temperature<br>शरीर का तापमान                                                                                     |                                |                                                           |
| c. Movement of infants<br>(voluntarily or when stimulated)<br>शिशुओं की शारीरिक गतिविधि (स्वेच्छा से या हिलाने डुलाने पर) |                                |                                                           |
| d. Breathing (fast/chest indrawing)<br>सांस (तेज/पसली धंसना)                                                              |                                |                                                           |
| e. Abnormal movements<br>/Seizures/<br>Convulsions<br>असमान्य गतिविधि/झटके/ऐटन                                            |                                |                                                           |
| f. Change in skin color<br>त्वचा का रंग में बदलाव                                                                         |                                |                                                           |
| g. Any other<br>अन्य                                                                                                      |                                |                                                           |

**Q.2 Are any of the symptoms told by you more significant:**

क्या आपके द्वारा बताये गये लक्षणों में से कोई ज्यादा महत्वपूर्ण है:

| Probe<br>पूछें                                                                                                                      | Write verbatim<br>कथन को लिखें | (Coding)<br>(For office use only)<br>केवल कार्यालय प्रयोग हेतु |
|-------------------------------------------------------------------------------------------------------------------------------------|--------------------------------|----------------------------------------------------------------|
| a. In first 6 days?<br>प्रथम 6 दिनों में                                                                                            |                                |                                                                |
| b. In first 28 days?<br>प्रथम 28 दिनों में                                                                                          |                                |                                                                |
| c. In 28-59 days?<br>28 से 59 दिनों के अंदर                                                                                         |                                |                                                                |
| d. Among those children who<br>are small at birth (< 2.5 kg)?<br>जन्म से कम वजन वाले बच्चों में<br>(< 2.5 kg)                       |                                |                                                                |
| e. Among those children who<br>are born in hospital/home?<br>अस्पताल/घर पर जन्म लेने वाले बच्चों में                                |                                |                                                                |
| f. Among those children who<br>are born before 37 weeks of<br>gestation?<br>गर्भधारण के 37 हफ्ते पूर्व जन्म लेने वाले<br>बच्चों में |                                |                                                                |
| g. Among those children who<br>are not exclusively breast<br>fed?<br>सिर्फ स्तनपान न करने वाले बच्चों में                           |                                |                                                                |

**Q. 3 Is yellow discoloration of skin a sign to seek medical care? Explain.** Yes/No/Don't know (Probe: Within 24 hours/when palms and soles are yellow)

क्या त्वचा का पीला पड़ना चिकित्सीय देखभाल की जरूरत का लक्षण है। स्पष्ट करें ? हाँ/नहीं/नहीं पता (पूछें: 24 घण्टों के अंदर जब हथेली/तलवे का रंग पीला हो )

(Write verbatim): \_\_\_\_\_

कथन लिखें:.....

**Q.4 Information on stools in newborns/ young Infants:**

नवजात शिशु/शिशुओं में मल की जानकारी:

| Probe<br>पूछें                                                                                                                                                                                                                                                                                                                          | Write verbatim<br>कथन लिखें | For office use only<br>कार्यालय प्रयोग हेतु |
|-----------------------------------------------------------------------------------------------------------------------------------------------------------------------------------------------------------------------------------------------------------------------------------------------------------------------------------------|-----------------------------|---------------------------------------------|
| a. How many times do young infants pass stools/day (in relation with feed)?<br>दो माह से छोटे बच्चे पूरे दिन में कितनी बार मल करते हैं।                                                                                                                                                                                                 |                             |                                             |
| b. Is it related to feeding<br>क्या यह आहार से सम्बंधित है?                                                                                                                                                                                                                                                                             |                             |                                             |
| c. What is the consistency of stools of breast feeding infants?<br>मां के दूध का सेवन करने वाले बच्चों में किस प्रकार का मल होता है?                                                                                                                                                                                                    |                             |                                             |
| d. Is it different in those not breastfed?<br>क्या यह स्तनपान न करने वाले बच्चों से अलग है?                                                                                                                                                                                                                                             |                             |                                             |
| e. When will you seek care for diarrhea in an infant?<br>डायरिया से ग्रसित दो माह से छोटे बच्चे को आप अस्पताल कब दिखाने ले जाएंगी?<br>(Probe: consistency of stools, frequency of stools, movement of infant, sunken eyes, loose skin etc.)<br>(पूछें: मल का प्रकार/मल की आवृत्ति, नवजात की गतिविधियाँ, धंसी हुई आंखें, ढीली त्वचा आदि) |                             |                                             |

**Q.5. Can infants get skin/mouth/eyes infections?**

क्या 2 माह से छोटे बच्चों में त्वचा/मुँह/आँखों से सम्बन्धित संक्रमण हो सकता है?

| Probe<br>पूछें                                                                                                                                                                           | Write verbatim<br>कथन लिखें | For office use only<br>कार्यालय प्रयोग हेतु |
|------------------------------------------------------------------------------------------------------------------------------------------------------------------------------------------|-----------------------------|---------------------------------------------|
| Skin Related<br>त्वचा सम्बंधी<br>a. Skin pustules<br>त्वचा में मवाद युक्त दाने<br>b. Umbilicus draining pus<br>नाभी से मवाद का रिसाव<br>c. Umbilicus with boil (s)<br>नाभी पर फोड़ा होना |                             |                                             |

|                                                                                                                                                            |  |  |
|------------------------------------------------------------------------------------------------------------------------------------------------------------|--|--|
| Eye Related<br>आंख सम्बंधी<br>a. Eyes draining pus<br>आंखों से कीचड़ आना                                                                                   |  |  |
| Oral cavity Related<br>मुख सम्बंधी<br>a. Tongue having white patches<br>जीभ पर सफेद चकत्ते<br>b. Any other patch in mouth<br>मुख में अन्य प्रकार के चकत्ते |  |  |

### Q.6 When will you consider that the infant is not feeding well?

आप यह कब तय करेंगे कि बच्चा ठीक तरह से आहार ग्रहण नहीं कर पा रहा है?

Probes: Sucking, Feeds number of times/day, Sleeping after the feeds, Hungry after feeds

पूछें : मां का दूध पीना, दिन में कितनी बार पीला है, दूध पीने के बाद सो जाता है, पेट खाली रहता है।

### Section 6.1\*: Breast Feeding Practices

भाग- 6.1 स्तनपान कराने का व्यवहार

|       |                                                                                                                                                |                                                                                                                                                                                                                                                                                                  |     |
|-------|------------------------------------------------------------------------------------------------------------------------------------------------|--------------------------------------------------------------------------------------------------------------------------------------------------------------------------------------------------------------------------------------------------------------------------------------------------|-----|
| 6.1.1 | How soon after the birth you breastfed the baby? जन्म के कितने समय पश्चात आपने शिशु को स्तनपान कराया?                                          | Less than 1 hour <sub>1</sub> / 1-4 hours <sub>2</sub> / 4- 24 hours <sub>3</sub> / >24 hours <sub>4</sub> / Never <sub>5</sub><br>एक घंटे से कम <sub>1</sub> /1-4 घंटे <sub>2</sub> /4-24 घंटे <sub>3</sub> / > 24 घंटे <sub>4</sub> /कभी नहीं <sub>5</sub>                                     | [ ] |
| 6.1.2 | If never breastfed than why? यदि कभी स्तनपान नहीं कराया तो क्यों? विवरण लिखें।<br>Note verbatim                                                | -----<br>-----<br><b>(English Translation)</b><br>-----<br>-----                                                                                                                                                                                                                                 |     |
| 6.1.3 | Did you give anything other than breast milk immediately after birth? जन्म के तुरन्त बाद क्या आपने शिशु को माँ के दूध के अतिरिक्त कुछ और दिया? | Not given <sub>1</sub> / Honey or `ghutti` or jaggery <sub>2</sub> / Water <sub>3</sub> / Any other <sub>4</sub> (specify) _____<br>नहीं दिया <sub>1</sub> /शहद या घुट्टी या गुड़/पानी <sub>3</sub> /अन्य <sub>4</sub> उल्लेख करें.....                                                          | [ ] |
| 6.1.4 | Did you give the baby the first milk? क्या आपने शिशु को अपना पहला पीला गाढ़ा दूध पिलाया?                                                       | Yes <sub>1</sub> हाँ ( go to Q. 5.6)<br>No <sub>2</sub> नहीं                                                                                                                                                                                                                                     | [ ] |
| 6.1.5 | If NO, give reasons for it यदि नहीं, इसका कारण बतायें।                                                                                         | It is unsafe <sub>1</sub> / Due to social customs <sub>2</sub> / Advised to discard it <sub>3</sub> /Others <sub>4</sub> (specify) .....<br>यह असुरक्षित है <sub>1</sub> /सामाजिक रीति-रिवाज के कारण <sub>2</sub> /इसको फेंकने की सलाह दी गयी <sub>3</sub> / अन्य <sub>4</sub> उल्लेख करें.....  | [ ] |
| 6.1.6 | How frequently did you breastfeed your baby? कितने समय के अन्तराल पर आप अपने बच्चे को दूध पिलाती है?                                           | On demand <sub>1</sub> /Every 2 hours <sub>2</sub> / Less than 8 times per day <sub>3</sub> /More than or equal to 8 times per day <sub>4</sub><br>बच्चों की मांग पर <sub>1</sub> / प्रति दो घंटों पर <sub>2</sub> /प्रतिदिन 8 बार से कम <sub>3</sub> /प्रति दिन 8 बार या उससे अधिक <sub>4</sub> | [ ] |
| 6.1.7 | Is the baby exclusively breastfed (not even water)? क्या आपने बच्चे को सिर्फ स्तनपान ही कराया? (पानी भी नहीं)                                  | Yes <sub>1</sub> हाँ<br>No <sub>2</sub> नहीं                                                                                                                                                                                                                                                     | [ ] |

|       |                                                                                                                                                                                  |                                                                                                                                                                                                                                                                                                                 |     |
|-------|----------------------------------------------------------------------------------------------------------------------------------------------------------------------------------|-----------------------------------------------------------------------------------------------------------------------------------------------------------------------------------------------------------------------------------------------------------------------------------------------------------------|-----|
| 6.1.8 | If baby is not being breastfed, then which method you are using to feed the baby? यदि बच्चे ने स्तनपान नहीं किया, तब बच्चे को आहार देने हेतु आप कौन सी विधि का प्रयोग कर रही है। | Spoon feeding <sub>1</sub> / Bottle feeding <sub>2</sub> /Others <sub>3</sub> specify _____ /<br>Not applicable (as baby only breastfed) <sub>4</sub><br>चम्मच द्वारा <sub>1</sub> /बोतल द्वारा <sub>2</sub> /अन्य कोई <sub>3</sub> उल्लेख करें.....<br>/लागू नहीं (बच्चा केवल स्तनपान ही करता है) <sub>4</sub> | [ ] |
| 6.1.9 | What is the frequency of urination of baby? बच्चा कितने-कितने अन्तराल पर पेशाब करता है।                                                                                          | After every feed <sub>1</sub> / 1 – 4 times per day <sub>2</sub> / 5 – 10 times per day <sub>3</sub> /Other <sub>4</sub> Specify _____<br>प्रत्येक आहार के बाद <sub>1</sub> /प्रतिदिन 1-4 बार <sub>2</sub> /प्रतिदिन 5-10 बार <sub>3</sub> / अन्य कोई <sub>4</sub> उल्लेख करें.....                             | [ ] |

| 6.2* | Which feeds has the infant had in the previous 24 hours?<br>पिछले 24 घंटे में शिशु ने क्या खाया                                  | Yes<br>हाँ | No<br>नहि                    | Don't<br>Know<br>पता नहीं | How many times?<br>कितनी बार |
|------|----------------------------------------------------------------------------------------------------------------------------------|------------|------------------------------|---------------------------|------------------------------|
| A    | Breastmilk स्तनपान                                                                                                               | [ ]        | [ ]                          | [ ]                       |                              |
| B    | Bottle Feed बोतल का दूध                                                                                                          | [ ]        | [ ]                          | [ ]                       |                              |
| C    | Top Milk ऊपर का दूध                                                                                                              | [ ]        | [ ]                          | [ ]                       |                              |
| D    | Plain Water सादा पानी                                                                                                            | [ ]        | [ ]                          | [ ]                       |                              |
| E    | Juice or juice drinks जूस                                                                                                        | [ ]        | [ ]                          | [ ]                       |                              |
| F    | Yogurt दही                                                                                                                       | [ ]        | [ ]                          | [ ]                       |                              |
| G    | Formula feed दब्बे का दूध                                                                                                        | [ ]        | [ ]                          | [ ]                       |                              |
| H    | Any other liquids? कोई और पीने की चीज                                                                                            | [ ]        | [ ]                          | [ ]                       |                              |
| 6.3* | Has the infant been fed expressed breastmilk?<br>क्या बच्चे को माँ का दूध निकाल कर पिलाया है                                     |            |                              |                           |                              |
| 6.4* | How many times has the infant fed in the past 24 hours?<br>पिछले 24 घंटे में शिशु को कितनी बार कुच दिया                          |            |                              |                           |                              |
| 6.5* | Has the infant been given any medicines or vitamins in 24 hours?<br>क्या शिशु को पिछले 24 घंटे में कोई दवाई दी                   |            |                              |                           |                              |
| 6.6* | If an infant has feeding problem who can you go to for advice?<br>अगर शिशु को दूध पीने में दिक्कत हो तोह किसके पास लेके जाते हैं |            | Spontaneous<br>अपने आप बताया |                           | Prompted<br>पूछने पे बताया   |
| A    | Elders in family परिवार में बड़े बुजुर्ग                                                                                         |            | [ ]                          |                           | [ ]                          |
| B    | Elders in village गाँव में बड़े                                                                                                  |            | [ ]                          |                           | [ ]                          |
| C    | ASHA आशा                                                                                                                         |            | [ ]                          |                           | [ ]                          |
| D    | ANM अणु एन एम                                                                                                                    |            | [ ]                          |                           | [ ]                          |
| E    | Doctor चिकित्सक                                                                                                                  |            | [ ]                          |                           | [ ]                          |
| F    | Other (Specify) कोई और (उल्लिखित करें)                                                                                           |            | [ ]                          |                           | [ ]                          |

## Q.7 From whom did you get information about symptoms of sickness in young infants?

(Tick all that apply)

नवजात में बीमारी के लक्षणों की जानकारी आपको किन स्रोतों से प्राप्त हुई?

|                                                                      |                                                                                                                                                                  |                                                                                                                                                                                     |
|----------------------------------------------------------------------|------------------------------------------------------------------------------------------------------------------------------------------------------------------|-------------------------------------------------------------------------------------------------------------------------------------------------------------------------------------|
| Seen a similar case in neighborhood<br>पड़ोस में इसी तरह का केस देखा |                                                                                                                                                                  | [ ]                                                                                                                                                                                 |
| 1.                                                                   | Had a similar case in family<br>a. Any of the previous child of her own<br>स्वयं का पहले का बच्चा<br>b. Any other child in family<br>परिवार में अन्य दूसरा बच्चा | [ ]<br>[ ]                                                                                                                                                                          |
| 2.                                                                   | Got information through :<br>(multiple options)<br>सूचना किसके द्वारा प्राप्त हुई (बहुविकल्पीय)                                                                  | 1. ASHA आशा [ ]<br>2. ANM एनएम [ ]<br>3. Doctor चिकित्सक [ ]<br>4. Media मीडिया [ ]<br>5. Index/other infant sick<br>चिन्हित/ अन्य बीमार नवजात शिशु [ ]<br>6. Any other<br>अन्य [ ] |
| 3*                                                                   | Have you contacted ASHA for any illness in the infant? (Yes / No)<br>क्या आप बीमारी के लिये आशा को मिलते हैं                                                     | [ ]                                                                                                                                                                                 |
| A                                                                    | If yes, how many times?<br>अगर हाँ तो कितनी बार                                                                                                                  | [ ]                                                                                                                                                                                 |
| 4*                                                                   | Have you met the ANM for the infant? (Yes / No)<br>क्या शिशु के लिये ए एन एम से मिले                                                                             | [ ]                                                                                                                                                                                 |
| A                                                                    | If yes, how many times?<br>अगर हाँ तो कितनी बार                                                                                                                  | [ ]                                                                                                                                                                                 |
| B                                                                    | How many of these visits were for an illness in the infant?<br>इन में से कितनी बारी शिशु की बीमारी के लिये गये                                                   | [ ]                                                                                                                                                                                 |

## Q.8 Does ASHA come to examine mother and young infant at home?

क्या आशा माँ एवं नवजात शिशु की जाँच हेतु घर आती है।

|                     |     |
|---------------------|-----|
| Yes हाँ             | [ ] |
| No नहीं             | [ ] |
| Don't know पता नहीं | [ ] |

|                                                                                     |                          |
|-------------------------------------------------------------------------------------|--------------------------|
| If yes, यदि हाँ                                                                     | Write verbatim कथन लिखें |
| a. What does she do?<br>वह क्या करती है?                                            |                          |
| b. Do you know how many times/when?<br>क्या आपको पता है कि कितनी बार आयी और कब आयी? |                          |

## Q.9 If a young infant gets sick, what should be done?

यदि शिशु बीमार पड़ता है, क्या करना चाहिए?

|                                           |                                                                                                                           |                                             |
|-------------------------------------------|---------------------------------------------------------------------------------------------------------------------------|---------------------------------------------|
| Possible Options<br>सम्भावित विकल्प       | If so then for what symptoms, when, why?<br>यदि ऐसा है तो कौन से लक्षण में, कब एवं क्यों?<br>(Write verbatim) (कथन लिखें) | For office use only<br>कार्यालय प्रयोग हेतु |
| a. Wait and watch<br>इंतजार करें और देखें |                                                                                                                           |                                             |

|                                                                            |  |  |
|----------------------------------------------------------------------------|--|--|
| b. Call or visit ASHA/ANM<br>आशा अथवा ए0एन0एम0 को बुलायेंगे<br>या दिखाएंगे |  |  |
| c. Take to Government hospital<br>सरकारी अस्पताल ले जाएंगे                 |  |  |
| d. Take to private hospital<br>निजी अस्पताल ले जायेंगे                     |  |  |
| e. Take to RMP<br>गांव के चिकित्सक के पास जाएंगे।                          |  |  |
| f. Any other, Specify<br>अन्य कोई, स्पष्ट करें                             |  |  |

|                                                                         |                                                               |
|-------------------------------------------------------------------------|---------------------------------------------------------------|
| 1. Date of Interview: [ ] [ ] / [ ] [ ] / [ ] [ ] [ ] [ ]<br>dd mm yyyy |                                                               |
| 2. Start Time: [ ] [ ] [ ] [ ]<br>(24 Hour format)                      | 3. End time of Interview: [ ] [ ] [ ] [ ]<br>(24 Hour format) |
| 4. Place of Interview: _____<br>Coding (for office use) _____           |                                                               |
| 5. Interviewer Signature: _____                                         | 6. Supervisor Signature: _____                                |
| 7. Name Interviewer (Initials only): [ ] [ ]                            | 8. Name Supervisor (Initials only): [ ] [ ]                   |
| Staff code: [ ] [ ]                                                     | Staff code: [ ] [ ]                                           |

|                                                                                                                                           | Reflections                                                                                                                                                            |
|-------------------------------------------------------------------------------------------------------------------------------------------|------------------------------------------------------------------------------------------------------------------------------------------------------------------------|
| Reflection on interview<br>(Comment on Body Language, Reliability, Unsaid Information, Self deductions beyond verbal communications etc.) |                                                                                                                                                                        |
| Level of Co-operation<br>(Scale 1 – 5)                                                                                                    | (Mark at the appropriate level)<br>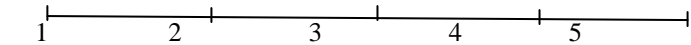<br>(Not co-operative) (Extremely co-operative) |
| Number of Interruptions during interview with reasons                                                                                     |                                                                                                                                                                        |



**Annexure**

Q10: List all live births (Chronologically)

सभी जीवित जन्मों की सूची (कालानुक्रमिक)

| Child number<br>बच्चे का क्रम | When was the child born (year)<br>बच्चे का जन्म कब हुआ (साल में) | Place of delivery(Home <sup>1</sup> / Private Institution <sup>2</sup> /Govt Institution <sup>3</sup> / Transit <sup>4</sup> )<br>प्रसव का स्थान (घर <sup>1</sup> / निजी संस्थान <sup>2</sup> /सरकारी संस्थान <sup>3</sup> / रास्ते में <sup>4</sup> ) | Immunization Status (Fully Immunized for age <sup>1</sup> /Not Immunized <sup>2</sup> )<br>टीकाकरण स्थिति (पूरी तरह से उम्र के लिए प्रतिरक्षित <sup>1</sup> / प्रतिरक्षित नहीं <sup>2</sup> ) | Living on day of interview (Yes/No)<br>बच्चा साक्षात्कार के दिन जीवित है (हां/नहीं) | Age (today/at death) If less than 1 year then please specify the age in months<br>आयु (आज / मृत्यु पर) यदि 1 वर्ष से कम हो तो कृपया महीनों में उम्र लिखें | If dead, Place of death (Home <sup>1</sup> / Private Institution <sup>2</sup> / Govt. Institution <sup>3</sup> / Transit <sup>4</sup> )<br>अगर मृत, मृत्यु का स्थान (घर <sup>1</sup> / निजी संस्थान/ सरकारी संस्थान <sup>2</sup> / रास्ते में <sup>3</sup> ) | If dead, Cause of death if known<br>अगर मृत, मृत्यु का कारण | If died following an illness, after how many days<br>यदि बीमारी के बाद मृत्यु हो गई है, तो कितने दिन बाद |
|-------------------------------|------------------------------------------------------------------|--------------------------------------------------------------------------------------------------------------------------------------------------------------------------------------------------------------------------------------------------------|-----------------------------------------------------------------------------------------------------------------------------------------------------------------------------------------------|-------------------------------------------------------------------------------------|-----------------------------------------------------------------------------------------------------------------------------------------------------------|--------------------------------------------------------------------------------------------------------------------------------------------------------------------------------------------------------------------------------------------------------------|-------------------------------------------------------------|----------------------------------------------------------------------------------------------------------|
| 1                             |                                                                  |                                                                                                                                                                                                                                                        |                                                                                                                                                                                               |                                                                                     |                                                                                                                                                           |                                                                                                                                                                                                                                                              |                                                             |                                                                                                          |
| 2                             |                                                                  |                                                                                                                                                                                                                                                        |                                                                                                                                                                                               |                                                                                     |                                                                                                                                                           |                                                                                                                                                                                                                                                              |                                                             |                                                                                                          |
| 3                             |                                                                  |                                                                                                                                                                                                                                                        |                                                                                                                                                                                               |                                                                                     |                                                                                                                                                           |                                                                                                                                                                                                                                                              |                                                             |                                                                                                          |
| 4                             |                                                                  |                                                                                                                                                                                                                                                        |                                                                                                                                                                                               |                                                                                     |                                                                                                                                                           |                                                                                                                                                                                                                                                              |                                                             |                                                                                                          |
| 5                             |                                                                  |                                                                                                                                                                                                                                                        |                                                                                                                                                                                               |                                                                                     |                                                                                                                                                           |                                                                                                                                                                                                                                                              |                                                             |                                                                                                          |
